# Supplementary material for: Burden of chronic diseases associated with periodontal diseases: a retrospective cohort study using UK primary care data
Source: PubMed Central journal article supplement — BMJ Open. 2021 Dec 19;11(12):e048296. doi: 10.1136/bmjopen-2020-048296 (PMC8689170; doi:10.1136/bmjopen-2020-048296), 2021-12-19
Supplement: bmjopen-2020-048296.draft_revisions.pdf [file bmjopen-2020-048296.draft_revisions.pdf]

# BMJ Open

BMJ Open is committed to open peer review. As part of this commitment we make the peer review history of every article we publish publicly available.

When an article is published we post the peer reviewers' comments and the authors' responses online. We also post the versions of the paper that were used during peer review. These are the versions that the peer review comments apply to.

The versions of the paper that follow are the versions that were submitted during the peer review process. They are not the versions of record or the final published versions. They should not be cited or distributed as the published version of this manuscript.

BMJ Open is an open access journal and the full, final, typeset and author-corrected version of record of the manuscript is available on our site with no access controls, subscription charges or pay-per-view fees (<http://bmjopen.bmj.com>).

If you have any questions on BMJ Open's open peer review process please email [info.bmjopen@bmj.com](mailto:info.bmjopen@bmj.com)

# BMJ Open

## The burden of chronic diseases associated with periodontal diseases: A retrospective cohort study using UK primary care data

|                               |                                                                                                                                                                                                                                                                                                                                                                                                                                                                                                                                                                                                                                                                                                                                                                                                                                                                                                                                                                                                                                                                                        |
|-------------------------------|----------------------------------------------------------------------------------------------------------------------------------------------------------------------------------------------------------------------------------------------------------------------------------------------------------------------------------------------------------------------------------------------------------------------------------------------------------------------------------------------------------------------------------------------------------------------------------------------------------------------------------------------------------------------------------------------------------------------------------------------------------------------------------------------------------------------------------------------------------------------------------------------------------------------------------------------------------------------------------------------------------------------------------------------------------------------------------------|
| Journal:                      | <i>BMJ Open</i>                                                                                                                                                                                                                                                                                                                                                                                                                                                                                                                                                                                                                                                                                                                                                                                                                                                                                                                                                                                                                                                                        |
| Manuscript ID                 | bmjopen-2020-048296                                                                                                                                                                                                                                                                                                                                                                                                                                                                                                                                                                                                                                                                                                                                                                                                                                                                                                                                                                                                                                                                    |
| Article Type:                 | Original research                                                                                                                                                                                                                                                                                                                                                                                                                                                                                                                                                                                                                                                                                                                                                                                                                                                                                                                                                                                                                                                                      |
| Date Submitted by the Author: | 22-Dec-2020                                                                                                                                                                                                                                                                                                                                                                                                                                                                                                                                                                                                                                                                                                                                                                                                                                                                                                                                                                                                                                                                            |
| Complete List of Authors:     | Zemedikun, Dawit; University of Birmingham, Institute of Applied Health Research<br>Chandan, Joht; University of Birmingham College of Medical and Dental Sciences, Institute of Applied Health Research<br>Raindi, Devan; Birmingham Dental Hospital<br>Rajgor, Amarkumar; Newcastle University School of Clinical Medical Sciences<br>Gokhale, Krishna; University of Birmingham<br>Thomas, Tom; University of Oxford, Kennedy Institute of Rheumatology<br>Falahee, Marie; University of Birmingham College of Medical and Dental Sciences, Institute of Inflammation and Ageing<br>DE PABLO, Paola; University of Birmingham College of Medical and Dental Sciences, Rheumatology, College of Medical & Dental Sciences<br>Lord, Janet; University of Birmingham College of Medical and Dental Sciences, MRC Centre for Immune Regulation<br>Raza, Karim; University of Birmingham College of Medical and Dental Sciences, College of Medical and Dental Sciences<br>Nirantharakumar, Krishnarajah; University of Birmingham College of Medical and Dental Sciences, Public Health |
| Keywords:                     | EPIDEMIOLOGY, Health informatics < BIOTECHNOLOGY & BIOINFORMATICS, ORAL MEDICINE, PUBLIC HEALTH                                                                                                                                                                                                                                                                                                                                                                                                                                                                                                                                                                                                                                                                                                                                                                                                                                                                                                                                                                                        |
|                               |                                                                                                                                                                                                                                                                                                                                                                                                                                                                                                                                                                                                                                                                                                                                                                                                                                                                                                                                                                                                                                                                                        |

SCHOLARONE™  
Manuscripts

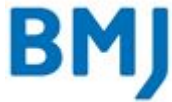

I, the Submitting Author has the right to grant and does grant on behalf of all authors of the Work (as defined in the below author licence), an exclusive licence and/or a non-exclusive licence for contributions from authors who are: i) UK Crown employees; ii) where BMJ has agreed a CC-BY licence shall apply, and/or iii) in accordance with the terms applicable for US Federal Government officers or employees acting as part of their official duties; on a worldwide, perpetual, irrevocable, royalty-free basis to BMJ Publishing Group Ltd ("BMJ") its licensees and where the relevant Journal is co-owned by BMJ to the co-owners of the Journal, to publish the Work in this journal and any other BMJ products and to exploit all rights, as set out in our [licence](#).

The Submitting Author accepts and understands that any supply made under these terms is made by BMJ to the Submitting Author unless you are acting as an employee on behalf of your employer or a postgraduate student of an affiliated institution which is paying any applicable article publishing charge ("APC") for Open Access articles. Where the Submitting Author wishes to make the Work available on an Open Access basis (and intends to pay the relevant APC), the terms of reuse of such Open Access shall be governed by a Creative Commons licence – details of these licences and which [Creative Commons](#) licence will apply to this Work are set out in our licence referred to above.

Other than as permitted in any relevant BMJ Author's Self Archiving Policies, I confirm this Work has not been accepted for publication elsewhere, is not being considered for publication elsewhere and does not duplicate material already published. I confirm all authors consent to publication of this Work and authorise the granting of this licence.

# The burden of chronic diseases associated with periodontal diseases: A retrospective cohort study using UK primary care data

**Running Title:** The association between chronic disease and periodontal diseases

**Author Names:**

Dawit T Zemedikun<sup>1\*</sup>, Joht Singh Chandan<sup>1,2\*</sup>, Devan Raindi<sup>3</sup>, Amarkumar Dhirajlal Rajgor<sup>4,5</sup>, Krishna Margadhmane Gokhale<sup>1</sup>, Tom Thomas<sup>6</sup>, Maria Falahee<sup>7</sup>, Paola De Pablo<sup>7</sup>, Janet M Lord<sup>7</sup>, Karim Raza<sup>7,8,9^</sup>, Krishnarajah Nirantharakumar<sup>1^</sup>

1 Institute of Applied Health Research, University of Birmingham, Birmingham, UK

2 Warwick Medical School, University of Warwick, Coventry, UK

3 Birmingham Dental Hospital, Birmingham, UK

4 The Newcastle Upon Tyne Hospitals NHS Foundation Trust, Newcastle, UK

5 Population Health Sciences, Newcastle University, Framlington Place, Newcastle upon Tyne, UK

6 Kennedy Institute of Rheumatology, University of Oxford, UK

7 Institute of Inflammation and Ageing, University of Birmingham, Birmingham, UK

8 Sandwell and West Birmingham NHS Trust, Birmingham UK

9 Research into Inflammatory Arthritis Centre Versus Arthritis and MRC- Versus Arthritis Centre for Musculoskeletal Ageing Research, University of Birmingham

\*Joint first author

^ Joint senior author

Corresponding author:

Dr Joht Singh Chandan

[Joht.chandan@nhs.net](mailto:Joht.chandan@nhs.net)

07535712715

1  
2  
3  
4  
5  
6  
7 **Word count: 3884**

8  
9 **Conflict of interest:** None

10  
11 **Contribution statement:** DTZ, JSC, KN and KR conceived the idea for the study. DTZ and JSC  
12 conducted the statistical analysis. DTZ and JSC drafted the report with input from all co-  
13 authors. All authors reviewed and approved the final manuscript.

14  
15 **Funding and acknowledgments:** This paper represents independent research part funded  
16 by the MRC Versus Arthritis Centre for Musculoskeletal Ageing Research. K Raza and JM  
17 Lord are supported by the NIHR Birmingham Biomedical Research Centre. The views  
18 expressed are those of the author(s) and not necessarily those of the NIHR or the  
19 Department of Health and Social Care. Professor Thomas Dietrich kindly also reviewed and  
20 commented on a finalised copy of the manuscript.

21  
22 **Data sharing:** The full data-set and statistical analysis code are available from author JSC  
23 (joht.chandan@nhs.net).

24  
25 **Patient and public involvement:** No patients were actively involved in setting the research  
26 question, outcome measures nor involved in the design of the study. Patients were not  
27 involved in interpretation or write up of the results, nor are there plans for the results to be  
28 disseminated to the patient community affected by this research.

29  
30 **Ethics approval:** Anonymised data were used throughout the study provided by the data  
31 provider to the University of Birmingham. Studies using IMRD-UK database have had initial  
32 ethical approval from the NHS South-East Multicentre Research Ethics Committee, subject  
33 to prior independent scientific review. The Scientific Review Committee (IQVIA) approved  
34 the study protocol (SRC Reference Number: SRC20THIN036).

35  
36 **Transparency statement:** The lead author (the manuscript's guarantor) affirms that this  
37 manuscript is an honest, accurate, and transparent account of the study being reported;  
38 that no important aspects of the study have been omitted; and that any discrepancies from  
39 the study as planned (and, if relevant, registered) have been explained.

## ABSTRACT

**Objectives:** To identify the association between periodontal diseases (gingivitis and periodontitis) and chronic diseases including cardiovascular disease, cardiometabolic disease, autoimmune disease and mental ill health.

**Design:** Retrospective cohort study.

**Setting:** UK primary care database (IQVIA Medical Research Data-UK) between 1<sup>st</sup> January 1995 and 1<sup>st</sup> January 2019.

**Participants:** 64,379 adult patients with a general practitioner recorded diagnosis of periodontal disease (exposed patients) were matched to 251,161 unexposed patients by age, sex, deprivation, and registration date.

**Main outcome measures:** Effect sizes for various chronic diseases are presented as adjusted odds ratios (aOR) and adjusted hazard ratios (aHR) with confidence intervals (CI).

**Results:** The average age at cohort entry was 45 years and the median follow-up was 3.4 years. At study entry, the exposed cohort had an increased likelihood of having a diagnosis of cardiovascular disease (aOR 1.43; 95% CI 1.38-1.48), cardiometabolic disease (aOR 1.16; 95% CI 1.13-1.19), autoimmune disease (aOR 1.33; 95% CI 1.28-1.37), and mental ill health (aOR 1.79; 95% CI 1.75-1.83) compared to the unexposed group. During follow-up of individuals without pre-existing outcomes of interest, the exposed group had an increased risk of developing cardiovascular disease (HR 1.18; 95% CI 1.13-1.23), cardiometabolic disease (HR 1.07; 95% CI 1.03-1.10), autoimmune disease (HR 1.33; 95% CI 1.26-1.40), and mental ill health (HR 1.37; 95% CI 1.33-1.42) compared to the unexposed group.

**Conclusions:** Periodontal diseases are very common; therefore, an increased risk of other chronic diseases represents a substantial public health burden. It is imperative that preventative approaches, including those aimed at preventing and detecting gingival

1  
2  
3 inflammation and its associated consequences, and improved communication between  
4 medical and dental teams, are implemented to reduce the risk of ill health.  
5  
6  
7

8 **Keywords:** oral health; gingivitis; periodontitis; epidemiology; chronic disease  
9

10 **Strengths and limitations:**  
11

- 12  
13 • Periodontal diseases including gingivitis and periodontitis are highly prevalent  
14 inflammatory conditions and lead to substantive morbidity, however studying  
15 their epidemiology in a general practice dataset had yet to be conducted prior to this  
16 study  
17  
18 • We found that those with a diagnosis of periodontal diseases had an increased risk  
19 of developing cardiovascular disease, cardiometabolic disease, autoimmune disease  
20 with similar effect sizes seen in validated smaller cohorts  
21  
22 • This was the first study to explore and quantify the association between mental ill  
23 health and periodontal diseases  
24  
25 • Despite the vast cohort size and medical implications of periodontal diseases, this  
26 study also highlights an important need for improved communication between  
27 dentists and general practitioners as to the health and wellbeing of their shared  
28 patients  
29  
30  
31  
32  
33  
34  
35  
36  
37  
38  
39  
40  
41  
42  
43  
44  
45  
46  
47  
48  
49  
50  
51  
52  
53  
54  
55  
56  
57  
58  
59  
60

## INTRODUCTION

Poor oral health is extremely common and is frequently characterised by chronic inflammation.<sup>1</sup> Advanced stages manifest as periodontitis where there is irreversible damage to local bone and tissue.<sup>2</sup> Earlier stages include gingivitis, a reversible inflammation of the gingiva initiated by dental plaque.<sup>2</sup> This spectrum from gingivitis to periodontitis, is widely termed 'periodontal diseases'.<sup>2,3</sup> Although, the exact aetiological mechanisms have yet to be fully elucidated, the development of a dysbiotic microbial biofilm, overactivation of inflammatory pathways and genetic susceptibility are all implicated.<sup>2,4-6</sup>

Progressive periodontal disease leads to a reduction in quality of life (QoL) due to problems relating with mastication (due to tooth loss), aesthetics (due to gum recession) and verbal communication.<sup>2,7,8</sup> Periodontal disease also results in a systemic pro-inflammatory state which in itself is implicated in the aetiology of chronic diseases including cardiovascular disease (CVD), cardiometabolic disease (CMD), mental ill health (MIH) and autoimmune disease (AID), each of which are highly prevalent and potentially preventable causes of global morbidity and mortality.<sup>1,9-17</sup> Therefore, a high prevalence of periodontal disease could translate to a substantial burden of morbidity and associated mortality.

Epidemiological data have demonstrated associations between periodontitis and all-cause mortality in Western European males (aHR 1.57; 95% CI 1.04-2.36).<sup>18</sup> Although, this relationship could be explained through activation of a pro-inflammatory state, there is a lack of robust epidemiological evidence as many of these chronic diseases share similar pathogenic pathways, often mediated by lifestyle factors including smoking and socioeconomic status.<sup>2,19-22</sup>

The association between periodontal disease and CVD is one of the more commonly researched. In 2012, the American Heart Association highlighted that, despite the literature supporting an association between periodontitis and atherosclerotic disease independent of known confounders, due to methodological limitations of available observational studies they were not able to confirm a causal relationship.<sup>23</sup> Existing studies are limited by an inability to distinguish reverse causality or account for recall bias (case-control or cross sectional designs), absence of adequate confounder control, lack of generalisability to other



1  
2  
3 populations and heterogeneity in definitions of exposure and outcomes.<sup>23–25</sup> A 2019 joint  
4 workshop held between the European Federation of Periodontology (EFP) and World Heart  
5 Federation (WHF) confirmed robust evidence for positive associations between  
6  
7 periodontitis and cardiovascular/cerebrovascular disease including an increased risk of first  
8  
9 cardiac or cerebrovascular event in patients with severe periodontitis.<sup>26</sup>  
10  
11  
12

13 A recent review from the US Centre for Disease Control (CDC) assessed the relationships  
14 between periodontal disease and other chronic diseases suggested that after CVD, the next  
15 most frequent association with periodontal disease was with levels of type 2 diabetes  
16 mellitus (T2DM) control. Emerging randomised trials suggest that treatment of periodontal  
17 disease reduces Hba1c levels in patients with diabetes<sup>27–29</sup>.<sup>28</sup> However, there is limited  
18 evidence exploring the risk of T2DM subsequent to periodontal disease and further  
19 investigation is needed.<sup>30</sup> Existing evidence suggests an association with autoimmune  
20 diseases such as rheumatoid arthritis (RA) and Sjogren's syndrome (SS), however, this is yet  
21 to be validated in longitudinal cohort datasets accounting for important covariates.<sup>31–33</sup> Few  
22 studies have explored the association between periodontal disease and subsequent mental  
23 ill health though a bi-directional mechanism relating to inflammation, psychosocial effects  
24 and the impact of psychopharmacological therapies has been proposed.<sup>34,35</sup>  
25  
26  
27  
28  
29  
30  
31  
32  
33  
34  
35

36 It is important to strengthen understanding of the link between oral health and chronic  
37 diseases as cost-effective dental interventions are available that could be preventive,  
38 reducing the subsequent public health burden of disease.<sup>2</sup> Therefore, we have conducted  
39 the first retrospective cohort study using a large medical dataset to explore the association  
40 between poor oral health and a range of chronic diseases including CVD, CMD, MIH and  
41  
42  
43  
44  
45  
46 AID.  
47  
48

## 49 **METHODS**

### 50 51 52 53 **Study design and data source**

54  
55  
56  
57 This study is a population based, retrospective open cohort study utilising IQVIA Medical  
58 Research Data (IMRD-UK), previously known as The Health Improvement Network (THIN)  
59  
60

1  
2  
3 database. The study period was set between 1st January 1995 and 1st January 2019. An  
4 open cohort study allows patients to enter and exit the study at different time points, with  
5 each patient only contributing person years of follow-up from the time of cohort entry  
6 (index date) to the time they leave the cohort (exit date).  
7  
8  
9

10  
11 During this study period, the database consisted of pseudo-anonymised electronic medical  
12 records of more than 15 million patients derived from 787 general practices using the Vision  
13 software system. The database is representative of the UK population in terms of  
14 demographic structure and prevalence of key comorbidities.<sup>36</sup> Symptoms, examinations,  
15 and diagnoses in THIN are recorded using a hierarchical clinical coding system called Read  
16 codes.<sup>37</sup> To improve data quality and reduce under-recording of events, general practices  
17 were included 12 months following instalment of electronic practice records or from the  
18 practice's acceptable mortality recording date.<sup>38,39</sup> A total of 8,618,829 patients were  
19 eligible to contribute during the study period. The data extraction and cohort selection was  
20 facilitated using the data extraction for epidemiological research (DExtER) tool.<sup>40</sup>  
21  
22  
23  
24  
25  
26  
27  
28  
29  
30

## 31 **Exposure and outcome definition**

32  
33  
34 The purpose of this study was to compare exposed patients (those with a GP recorded code  
35 of a periodontal disease, defined as either gingivitis or periodontitis) to unexposed patients  
36 (those without such codes) and then calculate their risk of developing chronic diseases  
37 defined through Read codes. The chronic disease outcomes were categorised as: CVD (CVD  
38 composite measure; heart failure (HF), ischaemic heart disease (HF), stroke/transient-  
39 ischaemic attack (TIA), peripheral vascular disease (PVD)), and vascular dementia (VD)),  
40 CMD (CMD composite measure; type 2 diabetes mellitus (T2DM), and hypertension (HTN)),  
41 AID (AID composite measure; type 1 diabetes mellitus (T1DM), rheumatoid arthritis (RA),  
42 systemic lupus erythematosus (SLE), Sjogren's syndrome (SS), vitiligo, psoriasis, pernicious  
43 anaemia (PA), inflammatory bowel disease (IBD), coeliac disease (CD), autoimmune  
44 thyroiditis (AT), and scleroderma), and MIH (MIH composite; depression, anxiety and  
45 serious mental illness (SMI). In addition, this study examined the odds ratio of having any  
46 chronic disease at the point of cohort entry (baseline) between the exposed and unexposed  
47 groups.  
48  
49  
50  
51  
52  
53  
54  
55  
56  
57  
58  
59  
60

1  
2  
3 Codes relating to exposure and outcomes were selected with the assistance of general  
4 practitioners, public health doctors and a periodontal specialist. Although, the IMRD-UK  
5 (previously named the THIN database) has been previously used to examine oral disorders  
6 such as temporomandibular joint disorders,<sup>41,42</sup> exposure code lists relating to gingivitis and  
7 periodontitis have never been previously validated. Outcome code lists included in this  
8 study have been used extensively in previously published work using the same database and  
9 many of the conditions included feature in the Quality Outcomes Framework.<sup>43-51</sup> Read  
10 code lists relating to exposure terms are provided in appendix (**eTable 1**).

### 19 **Selection of unexposed group**

23 Each exposed patient was matched with up to four unexposed control patients from the  
24 remaining sample of patients in the dataset, who had no previously documented code  
25 relating to exposure. Controls were taken from a pool from eligible patients registered at a  
26 general practice within the same country of the UK and were matched by age at index date  
27 (+/- one year), sex, Townsend deprivation index<sup>52</sup> and registration date (+/- 12 months).

### 33 **Follow-up period**

37 The index date for those in the exposed group was the date of the first Read code relating to  
38 exposure or when they became eligible to enter the study for those with a previous history  
39 of exposure (prevalent cases). Patients aged 18 years or older were eligible for entry into  
40 the cohort, therefore those who had the exposure of interest at an earlier age would enter  
41 the study as a prevalent case. To mitigate immortality time bias,<sup>53</sup> the same index date was  
42 assigned to the corresponding unexposed patient. The follow-up period for each patient  
43 was from the index date until the exit date. Exit date was defined as the earliest of the  
44 following end dates: study end date, last date of data collection from a given general  
45 practice, date patient transferred from general practice, date of death or date the outcome  
46 of interest occurred.

## Statistical analysis

Categorical baseline data were described using proportions and continuous data described using means with standard deviations (sd). Missing data are highlighted in relevant baseline characteristic tables. Missing covariate data were treated as a separate missing category and included in the final analysis. Co-variables considered in our modelling were selected due to their independent relationship with the outcome of interest or to remove any residual confounding. These included: age, sex, body mass index (BMI), Townsend deprivation index (measured in quintiles), smoking status and ethnicity.

To describe the prevalence of chronic disease at baseline, we used logistic regression to estimate unadjusted odds ratio (OR) and adjusted OR (aOR), following adjustment for key covariates. To calculate an incidence rate ((IR) per 1000 person-years) for each of the outcomes of interest, patients with pre-existing chronic disease were excluded to ensure the IR reflected outcomes which occurred following cohort entry. Cox regression accounting for person years of follow-up was then used to calculate a hazard ratio (HR) for each outcome of interest during the study period. Following adjustment for the co-variables, we calculated and presented an adjusted HR (aHR). ORs and HRs are presented with 95% confidence intervals with statistical significance set at  $p < 0.05$ .

An initial sensitivity analysis was conducted, isolating incident only cases (where the exposure occurred during the study period) compared to their respective controls. Throughout this paper we use the term periodontal disease to reflect the continuum from gingivitis to periodontitis though we conducted a second sensitivity analysis to examine if the outcomes differed when only examining cases with recorded periodontitis and their respective controls (exclusion of patients with a record of gingivitis and their respective controls). Stata version 15.1 SE software (StataCorp 2017) was used to conduct all analyses.

## Patient and public involvement

No patients were actively involved in setting the research question, outcome measures nor involved in the design of the study. Patients were not involved in interpretation or write up

of the results, nor are there plans for the results to be disseminated to the patient community affected by this research.

## RESULTS

### Study characteristics

Of the eligible patients during the study period, we identified 64,379 patients with a recorded history of a periodontal disease, of whom 60,995 had gingivitis and 3,384 had periodontitis, who were matched to 251,161 unexposed patients. The median follow-up was similar in the two groups (exposed: 3.3 years, and unexposed: 3.5 years). The mean age at cohort entry was 44 years and 43% of the cohort were male. Due to matching, smoking status (30% current smokers) and deprivation levels were similar between the groups. Additionally, BMI and ethnicity (despite 56% missing data) profiles were similar between the groups. Further details can be seen in **Table 1**.

**Table 1: Baseline characteristics of the study population**

|                               | Primary cohort   |                    |
|-------------------------------|------------------|--------------------|
|                               | Exposed<br>n (%) | Unexposed<br>n (%) |
| All                           | (n=64,379)       | (n=251,161)        |
| Sex (Male)                    | 27699 (43.02)    | 107977 (42.99)     |
| Age at index date             | 45.66 (19.12)    | 45.40 (18.97)      |
| Age categories                |                  |                    |
| 18 - 24 years                 | 10680 (16.59)    | 42204 (16.80)      |
| 25 - 34 years                 | 11266 (17.50)    | 44556 (17.74)      |
| 35 - 44 years                 | 10895 (16.92)    | 42641 (16.98)      |
| 45 - 54 years                 | 10186 (15.82)    | 39795 (15.84)      |
| 55 - 64 years                 | 8917 (13.85)     | 34621 (13.78)      |
| 65 - 74 years                 | 6900 (10.72)     | 26649 (10.61)      |
| 75 & overs                    | 5535 (8.60)      | 20695 (8.24)       |
| BMI                           | 26.29 (5.64)     | 26.27 (5.51)       |
| BMI Categories                |                  |                    |
| Under/Normal weight (18.5-25) | 23743 (36.88)    | 91020 (36.24)      |

|                    |               |                |
|--------------------|---------------|----------------|
| Overweight (25-30) | 16044 (24.92) | 63782 (25.39)  |
| Obese (>30)        | 10857 (16.86) | 40589 (16.16)  |
| Missing            | 13735 (21.33) | 55770 (22.20)  |
| Townsend quintiles |               |                |
| 1 (Least deprived) | 11548 (17.94) | 42631 (16.97)  |
| 2                  | 10868 (16.88) | 38909 (15.49)  |
| 3                  | 12216 (18.98) | 43494 (17.32)  |
| 4                  | 12005 (18.65) | 41440 (16.50)  |
| 5 (Most deprived)  | 9610 (14.93)  | 30831 (12.28)  |
| Missing            | 8132 (12.63)  | 53856 (21.44)  |
| Smoking categories |               |                |
| Non-smoker         | 29100 (45.20) | 114513 (45.59) |
| Smoker             | 19279 (29.95) | 75155 (29.92)  |
| Ex-smoker          | 11107 (17.25) | 42647 (16.98)  |
| Missing            | 4893 (7.60)   | 18846 (7.50)   |
| Ethnicity          |               |                |
| Caucasian          | 24327 (37.79) | 96169 (38.29)  |
| Mixed race         | 477 (0.74)    | 1860 (0.74)    |
| Other              | 215 (0.33)    | 925 (0.37)     |
| Black              | 937 (1.46)    | 2951 (1.17)    |
| South Asian        | 2512 (3.90)   | 4340 (1.73)    |
| Missing            | 35911 (55.78) | 144916 (57.70) |

## Chronic disease at cohort entry

At cohort entry there were 6,355 patients (9.9%) in the exposed group who had a diagnosis of CVD compared to 18,594 (7.4%) in the unexposed group. Following adjustment for co-variables this translated to an aOR of 1.43 (95% CI 1.38-1.48). When examining CMD, 12,321 patients (19.1%) in the exposed group had a diagnosis of CMD at cohort entry compared to 42,828 (17.1%) in the unexposed group. This translated into an aOR of 1.16 (95% CI 1.13-1.19), and the association with the presence of T2DM (aOR 1.23; 95% CI 1.18-1.28) was notable. With AID, 5,265 patients (8.2%) in the exposed group had a diagnosis of AID at cohort entry compared to 15,690 (6.3%) in the unexposed group equating to an aOR of 1.33 (95% CI 1.28-1.37). Lastly, MIH was seen to have the greatest odds ratio (aOR 1.79; 95% CI 1.75-1.83) with periodontal disease at cohort entry with 19,142 patients (29.7%) in the exposed group who had a diagnosis of AID at cohort entry compared to 48,998 (19.5%) in the unexposed group. Further results can be seen in **Table 2** and **Figure 1**.

1  
2  
3  
4  
5  
6  
7  
8  
9  
10  
11  
12  
13  
14  
15  
16  
17  
18  
19  
20  
21  
22  
23  
24  
25  
26  
27  
28  
29  
30  
31  
32  
33  
34  
35  
36  
37  
38  
39  
40  
41  
42  
43  
44  
45  
46  
47  
48  
49  
50  
51  
52  
53  
54  
55  
56  
57  
58  
59  
60

For peer review only

**Table 2: Risk of chronic diseases at baseline in patients exposed and unexposed to periodontal diseases**

|                                                     | All cardiovascular disease |               | Heart failure               |                | Ischaemic heart disease  |               | Stroke/transient-ischaemic attack |                | Peripheral vascular disease |               |
|-----------------------------------------------------|----------------------------|---------------|-----------------------------|----------------|--------------------------|---------------|-----------------------------------|----------------|-----------------------------|---------------|
|                                                     | Exposed                    | Unexposed     | Exposed                     | Unexposed      | Exposed                  | Unexposed     | Exposed                           | Unexposed      | Exposed                     | Unexposed     |
| Total number of patients                            | 64,379                     | 251,161       | 64,379                      | 251,161        | 64,379                   | 251,161       | 64,379                            | 251,161        | 64,379                      | 251,161       |
| Number of patients with condition at baseline, n(%) | 6,355 (9.87)               | 18,594 (7.40) | 977 (1.52)                  | 2,608 (1.04)   | 3,963 (6.16)             | 11,759 (4.68) | 2,161 (3.36)                      | 6,154 (2.45)   | 860 (1.34)                  | 2,345 (0.93)  |
| OR (95% CI)*                                        | 1.37 (1.33-1.41)           |               | 1.47 (1.36-1.58)            |                | 1.34 (1.29-1.39)         |               | 1.38 (1.32-1.45)                  |                | 1.44 (1.33-1.55)            |               |
| P value                                             | p<0.01                     |               | p<0.01                      |                | p<0.01                   |               | p<0.01                            |                | p<0.01                      |               |
| aOR (95% CI)**                                      | 1.43 (1.38-1.48)           |               | 1.43 (1.32-1.54)            |                | 1.34 (1.28-1.39)         |               | 1.36 (1.29-1.44)                  |                | 1.37 (1.26-1.49)            |               |
| P value                                             | p<0.01                     |               | p<0.01                      |                | p<0.01                   |               | p<0.01                            |                | p<0.01                      |               |
|                                                     | Vascular dementia          |               | All cardiometabolic disease |                | Type 2 diabetes mellitus |               | Hypertension                      |                | All autoimmune conditions   |               |
|                                                     | Exposed                    | Unexposed     | Exposed                     | Unexposed      | Exposed                  | Unexposed     | Exposed                           | Unexposed      | Exposed                     | Unexposed     |
| Total number of patients                            | 64,379                     | 251,161       | 64,379                      | 251,161        | 64,379                   | 251,161       | 64,379                            | 251,161        | 64,379                      | 251,161       |
| Number of patients with condition at baseline, n(%) | 146 (0.23)                 | 363 (0.14)    | 12,321 (19.14)              | 42,828 (17.05) | 3,432 (5.33)             | 10,342 (4.12) | 10,841 (16.84)                    | 38,649 (15.39) | 5,265 (8.18)                | 15,690 (6.25) |
| OR (95% CI)*                                        | 1.57 (1.30-1.90)           |               | 1.15 (1.13-1.18)            |                | 1.31 (1.26-1.36)         |               | 1.11 (1.09-1.14)                  |                | 1.34 (1.29-1.38)            |               |
| P value                                             | p<0.01                     |               | p<0.01                      |                | p<0.01                   |               | p<0.01                            |                | p<0.01                      |               |
| aOR (95% CI)**                                      | 1.47 (1.20-1.79)           |               | 1.16 (1.13-1.19)            |                | 1.23 (1.18-1.28)         |               | 1.11 (1.08-1.15)                  |                | 1.33 (1.28-1.37)            |               |
| P value                                             | p<0.01                     |               | p<0.01                      |                | p<0.01                   |               | p<0.01                            |                | p<0.01                      |               |



|                                                     | Type 1 diabetes mellitus |              | Rheumatoid arthritis         |              | Systemic lupus erythematosus |              | Sjogren          |            | Vitiligo               |            |
|-----------------------------------------------------|--------------------------|--------------|------------------------------|--------------|------------------------------|--------------|------------------|------------|------------------------|------------|
|                                                     | Exposed                  | Unexposed    | Exposed                      | Unexposed    | Exposed                      | Unexposed    | Exposed          | Unexposed  | Exposed                | Unexposed  |
| Total number of patients                            | 64,379                   | 251,161      | 64,379                       | 251,161      | 64,379                       | 251,161      | 64,379           | 251,161    | 64,379                 | 251,161    |
| Number of patients with condition at baseline, n(%) | 591 (0.92)               | 1,473 (0.59) | 656 (1.02)                   | 1,786 (0.71) | 164 (0.25)                   | 346 (0.14)   | 103 (0.16)       | 189 (0.08) | 239 (0.37)             | 629 (0.25) |
| OR (95% CI)*                                        | 1.57 (1.43-1.73)         |              | 1.44 (1.31-1.57)             |              | 1.85 (1.54-2.23)             |              | 2.13 (1.67-2.71) |            | 1.48 (1.28-1.72)       |            |
| P value                                             | p<0.01                   |              | p<0.01                       |              | p<0.01                       |              | p<0.01           |            | p<0.01                 |            |
| aOR (95% CI)**                                      | 1.55 (1.41-1.71)         |              | 1.39 (1.27-1.53)             |              | 1.79 (1.48-2.16)             |              | 1.99 (1.56-2.54) |            | 1.40 (1.20-1.62)       |            |
| P value                                             | p<0.01                   |              | p<0.01                       |              | p<0.01                       |              | p<0.01           |            | p<0.01                 |            |
|                                                     | Psoriasis                |              | Pernicious anaemia           |              | Inflammatory bowel disease   |              | Coeliac          |            | Autoimmune thyroiditis |            |
|                                                     | Exposed                  | Unexposed    | Exposed                      | Unexposed    | Exposed                      | Unexposed    | Exposed          | Unexposed  | Exposed                | Unexposed  |
| Total number of patients                            | 64,379                   | 251,161      | 64,379                       | 251,161      | 64,379                       | 251,161      | 64,379           | 251,161    | 64,379                 | 251,161    |
| Number of patients with condition at baseline, n(%) | 2,615 (4.06)             | 8,105 (3.23) | 231 (0.36)                   | 738 (0.29)   | 560 (0.87)                   | 1,767 (0.70) | 206 (0.32)       | 576 (0.23) | 209 (0.32)             | 721 (0.29) |
| OR (95% CI)*                                        | 1.27 (1.21-1.33)         |              | 1.22 (1.05-1.42)             |              | 1.24 (1.13-1.36)             |              | 1.40 (1.19-1.64) |            | 1.13 (0.97-1.32)       |            |
| P value                                             | p<0.01                   |              | p<0.01                       |              | p<0.01                       |              | p<0.01           |            | p=0.12                 |            |
| aOR (95% CI)**                                      | 1.27 (1.21-1.33)         |              | 1.16 (1.00-1.35)             |              | 1.24 (1.12-1.36)             |              | 1.40 (1.19-1.65) |            | 1.12 (0.96-1.31)       |            |
| P value                                             | p<0.01                   |              | p=0.05                       |              | p<0.01                       |              | p<0.01           |            | p=0.16                 |            |
|                                                     | Scleroderma              |              | All mental health conditions |              | Depression                   |              | Anxiety          |            | Severe mental illness  |            |
|                                                     | Exposed                  | Unexposed    | Exposed                      | Unexposed    | Exposed                      | Unexposed    | Exposed          | Unexposed  | Exposed                | Unexposed  |

1  
2  
3  
4  
5  
6  
7  
8  
9  
10  
11  
12  
13  
14  
15  
16  
17  
18  
19  
20  
21  
22  
23  
24  
25  
26  
27  
28  
29  
30  
31  
32  
33  
34  
35  
36  
37  
38  
39  
40  
41  
42  
43  
44  
45  
46

|                                                     |                  |           |                  |                |                  |                |                  |               |                  |              |
|-----------------------------------------------------|------------------|-----------|------------------|----------------|------------------|----------------|------------------|---------------|------------------|--------------|
| Total number of patients                            | 64,379           | 251,161   | 64,379           | 251,161        | 64,379           | 251,161        | 64,379           | 251,161       | 64,379           | 251,161      |
| Number of patients with condition at baseline, n(%) | 42 (0.07)        | 94 (0.04) | 19,142 (29.73)   | 48,998 (19.51) | 13,496 (20.96)   | 34,415 (13.70) | 9,623 (14.95)    | 22,093 (8.80) | 1,242 (1.93)     | 2,905 (1.16) |
| OR (95% CI)*                                        | 1.74 (1.21-2.51) |           | 1.75 (1.71-1.78) |                | 1.67 (1.63-1.71) |                | 1.82 (1.78-1.87) |               | 1.68 (1.57-1.80) |              |
| P value                                             | p<0.01           |           | p<0.01           |                | p<0.01           |                | p<0.01           |               | p<0.01           |              |
| aOR (95% CI)**                                      | 1.69 (1.17-2.44) |           | 1.79 (1.75-1.83) |                | 1.69 (1.65-1.73) |                | 1.83 (1.79-1.88) |               | 1.66 (1.55-1.77) |              |
| P value                                             | p<0.01           |           | p<0.01           |                | p<0.01           |                | p<0.01           |               | p<0.01           |              |

\* Unadjusted odds ratio, OR: odds ratio, aOR: adjusted odds ratio  
 \*\* Adjusted odds ratio: adjusted for age, sex, body mass index, Townsend deprivation index, smoking status and ethnicity at baseline

## The risk of developing subsequent chronic disease

During the study period there were 3,104 (5.4%) new diagnoses of CVD in the exposed cohort equating to an IR of 8.2 per 1000 person-years compared to 7.3 per 1000 person-years (10,439 (4.5%) new recorded diagnoses) in the unexposed cohort. This translated to an aHR of 1.18 (95% CI 1.13-1.23). When examining CMD, there were 5,005 (9.6%) new diagnoses of CMD in the exposed cohort equating to an IR of 15.5 per 1000 person-years compared to 14.6 per 1000 person-years (17,822 (8.6%) new recorded diagnoses) in the unexposed cohort. Ultimately this translated into an aHR of 1.07 (95% CI 1.03-1.10) where the risk was highest for the development of T2DM (aHR 1.26; 95% CI 1.21-1.32). When examining AID, there were 1,945 (3.3%) new diagnoses of AID in the exposed cohort equating to an IR of 5.8 per 1000 person-years compared to 4.3 per 1000 person-years (5,674 (2.4%) new recorded diagnoses) in the unexposed cohort. This translated into an aHR of 1.33 (95% CI 1.26-1.40). Finally, with MIH, there were 5,296 (11.7%) new diagnoses of MIH in the exposed cohort relating to an IR of 19.2 per 1000 person-years compared to 14.2 per 1000 person-years (16,758 (8.3%) new recorded diagnoses) in the unexposed cohort. This translated into an aHR of 1.37 (95% CI 1.33-1.42). Further details can be seen on **Table 3 and Figure 2.**

**Table 3: Risk of subsequent development of chronic diseases in patients exposed and unexposed to periodontal diseases**

|                            | All cardiovascular disease |                  | Heart failure               |                  | Ischaemic heart disease  |                  | Stroke/transient-ischaemic attack |                  | Peripheral vascular disease |                  |
|----------------------------|----------------------------|------------------|-----------------------------|------------------|--------------------------|------------------|-----------------------------------|------------------|-----------------------------|------------------|
|                            | Exposed                    | Unexposed        | Exposed                     | Unexposed        | Exposed                  | Unexposed        | Exposed                           | Unexposed        | Exposed                     | Unexposed        |
| Number of patients         | 58,024                     | 232,567          | 63,402                      | 248,553          | 60,416                   | 239,402          | 62,218                            | 245,007          | 63,519                      | 248,816          |
| Number of outcomes, n(%)   | 3,104 (5.35)               | 10,439 (4.49)    | 906 (1.43)                  | 2,913 (1.17)     | 1,535 (2.54)             | 4,821 (2.01)     | 1,524 (2.45)                      | 4,956 (2.02)     | 615 (0.97)                  | 1,716 (0.69)     |
| Person-years               | 379,982                    | 1,433,611        | 423,176                     | 1,560,448        | 398,431                  | 1,489,663        | 413,659                           | 1,531,088        | 422,593                     | 1,560,781        |
| IR (per 1000 person-years) | 8.17                       | 7.28             | 2.14                        | 1.87             | 3.85                     | 3.24             | 3.68                              | 3.24             | 1.46                        | 1.1              |
| Follow-up, Median(IQR)     | 5.49 (2.36-9.85)           | 5.00 (2.07-9.33) | 5.62 (2.45-10.10)           | 5.15 (2.14-9.51) | 5.52 (2.39-9.95)         | 5.08 (2.11-9.42) | 5.59 (2.44-10.04)                 | 5.11 (2.12-9.46) | 5.59 (2.43-10.05)           | 5.14 (2.14-9.50) |
| HR (95% CI)*               | 1.12 (1.07-1.16)           |                  | 1.14 (1.06-1.23)            |                  | 1.19 (1.12-1.26)         |                  | 1.13 (1.07-1.20)                  |                  | 1.32 (1.20-1.45)            |                  |
| P value                    | p<0.01                     |                  | p<0.01                      |                  | p<0.01                   |                  | p<0.01                            |                  | p<0.01                      |                  |
| aHR (95% CI)**             | 1.18 (1.13-1.23)           |                  | 1.15 (1.07-1.24)            |                  | 1.22 (1.16-1.30)         |                  | 1.16 (1.10-1.23)                  |                  | 1.32 (1.20-1.45)            |                  |
| P value                    | p<0.01                     |                  | p<0.01                      |                  | p<0.01                   |                  | p<0.01                            |                  | p<0.01                      |                  |
|                            | Vascular dementia          |                  | All cardiometabolic disease |                  | Type 2 diabetes mellitus |                  | Hypertension                      |                  | All autoimmune conditions   |                  |
|                            | Exposed                    | Unexposed        | Exposed                     | Unexposed        | Exposed                  | Unexposed        | Exposed                           | Unexposed        | Exposed                     | Unexposed        |
| Number of patients         | 64,233                     | 250,798          | 52,058                      | 208,333          | 60,947                   | 240,819          | 53,538                            | 212,512          | 59,114                      | 235,471          |
| Number of outcomes, n(%)   | 262 (0.41)                 | 849 (0.34)       | 5,005 (9.61)                | 17,822 (8.55)    | 2,654 (4.35)             | 7,762 (3.22)     | 4,146 (7.74)                      | 15,340 (7.22)    | 1,945 (3.29)                | 5,674 (2.41)     |
| Person-years               | 429,726                    | 1,578,418        | 323,472                     | 1,218,325        | 397,557                  | 1,486,326        | 335,761                           | 1,252,770        | 334,525                     | 1,325,645        |
| IR (per 1000 person-years) | 0.61                       | 0.54             | 15.47                       | 14.63            | 6.68                     | 5.22             | 12.35                             | 12.24            | 5.81                        | 4.28             |
| Follow-up, Median(IQR)     | 5.63 (2.46-10.12)          | 5.17 (2.15-9.51) | 5.10 (2.16-9.38)            | 4.61 (1.90-8.82) | 5.44 (2.34-9.83)         | 5.01 (2.08-9.34) | 5.16 (2.19-9.48)                  | 4.67 (1.92-8.89) | 4.34 (1.73-8.60)            | 4.34 (1.73-8.54) |

1  
2  
3  
4  
5  
6  
7  
8  
9  
10  
11  
12  
13  
14  
15  
16  
17  
18  
19  
20  
21  
22  
23  
24  
25  
26  
27  
28  
29  
30  
31  
32  
33  
34  
35  
36  
37  
38  
39  
40  
41  
42  
43  
44  
45  
46

|                |                  |                  |                  |                  |                  |
|----------------|------------------|------------------|------------------|------------------|------------------|
| HR (95% CI)*   | 1.12 (0.97-1.29) | 1.05 (1.02-1.09) | 1.27 (1.22-1.33) | 1.01 (0.97-1.04) | 1.34 (1.28-1.41) |
| P value        | p=0.11           | p<0.01           | p<0.01           | p=0.73           | p<0.01           |
| aHR (95% CI)** | 1.12 (0.97-1.29) | 1.07 (1.03-1.10) | 1.26 (1.21-1.32) | 1.02 (0.98-1.05) | 1.33 (1.26-1.40) |
| P value        | p=0.12           | p<0.01           | p<0.01           | p=0.33           | p<0.01           |

|                            | Type 1 diabetes mellitus |                  | Rheumatoid arthritis |                  | Systemic lupus erythematosus |                  | Sjogren           |                  | Vitiligo          |                  |
|----------------------------|--------------------------|------------------|----------------------|------------------|------------------------------|------------------|-------------------|------------------|-------------------|------------------|
|                            | Exposed                  | Unexposed        | Exposed              | Unexposed        | Exposed                      | Unexposed        | Exposed           | Unexposed        | Exposed           | Unexposed        |
| Number of patients         | 63,788                   | 249,688          | 63,723               | 249,375          | 64,215                       | 250,815          | 64,276            | 250,972          | 64,140            | 250,532          |
| Number of outcomes, n(%)   | 144 (0.23)               | 283 (0.11)       | 298 (0.47)           | 819 (0.33)       | 75 (0.12)                    | 143 (0.06)       | 77 (0.12)         | 109 (0.04)       | 115 (0.18)        | 293 (0.12)       |
| Person-years               | 425,877                  | 1,570,752        | 425,066              | 1,565,997        | 429,121                      | 1,578,247        | 429,555           | 1,579,238        | 428,400           | 1,575,663        |
| IR (per 1000 person-years) | 0.34                     | 0.18             | 0.7                  | 0.52             | 0.17                         | 0.09             | 0.18              | 0.07             | 0.27              | 0.19             |
| Follow-up, Median(IQR)     | 5.62 (2.45-10.10)        | 5.16 (2.15-9.51) | 5.61 (2.45-10.08)    | 5.15 (2.14-9.51) | 5.62 (2.45-10.11)            | 5.17 (2.15-9.51) | 5.63 (2.46-10.10) | 5.17 (2.15-9.51) | 5.62 (2.45-10.10) | 5.16 (2.15-9.51) |
| HR (95% CI)*               | 1.89 (1.55-2.32)         |                  | 1.33 (1.17-1.52)     |                  | 1.93 (1.46-2.56)             |                  | 2.58 (1.92-3.45)  |                  | 1.45 (1.17-1.80)  |                  |
| P value                    | p<0.01                   |                  | p<0.01               |                  | p<0.01                       |                  | p<0.01            |                  | p<0.01            |                  |
| aHR (95% CI)**             | 1.80 (1.47-2.20)         |                  | 1.33 (1.16-1.52)     |                  | 1.93 (1.46-2.56)             |                  | 2.51 (1.87-3.38)  |                  | 1.37 (1.10-1.71)  |                  |
| P value                    | p<0.01                   |                  | p<0.01               |                  | p<0.01                       |                  | p<0.01            |                  | p<0.01            |                  |

|                            | Psoriasis  |              | Pernicious anaemia |            | Inflammatory bowel disease |            | Coeliac    |            | Autoimmune thyroiditis |            |
|----------------------------|------------|--------------|--------------------|------------|----------------------------|------------|------------|------------|------------------------|------------|
|                            | Exposed    | Unexposed    | Exposed            | Unexposed  | Exposed                    | Unexposed  | Exposed    | Unexposed  | Exposed                | Unexposed  |
| Number of patients         | 61,764     | 243,056      | 64,148             | 250,423    | 63,819                     | 249,394    | 64,173     | 250,585    | 64,170                 | 250,440    |
| Number of outcomes, n(%)   | 892 (1.44) | 2,799 (1.15) | 156 (0.24)         | 463 (0.18) | 228 (0.36)                 | 667 (0.27) | 121 (0.19) | 334 (0.13) | 99 (0.15)              | 298 (0.12) |
| Person-years               | 408,643    | 1,514,347    | 428,404            | 1,574,721  | 425,814                    | 1,566,813  | 428,547    | 1,575,926  | 428,443                | 1,574,813  |
| IR (per 1000 person-years) | 2.18       | 1.85         | 0.36               | 0.29       | 0.54                       | 0.43       | 0.28       | 0.21       | 0.23                   | 0.19       |

|                            |                    |                  |                                     |                  |                   |                  |                   |                  |                              |                  |
|----------------------------|--------------------|------------------|-------------------------------------|------------------|-------------------|------------------|-------------------|------------------|------------------------------|------------------|
| Follow-up, Median(IQR)     | 5.55 (2.42-9.98)   | 5.09 (2.11-9.44) | 5.62 (2.46-10.10)                   | 5.16 (2.15-9.51) | 5.61 (2.45-10.09) | 5.15 (2.14-9.51) | 5.62 (2.45-10.10) | 5.16 (2.15-9.51) | 5.62 (2.45-10.09)            | 5.16 (2.15-9.51) |
| HR (95% CI)*               | 1.18 (1.10-1.27)   |                  | 1.24 (1.03-1.48)                    |                  | 1.26 (1.08-1.46)  |                  | 1.33 (1.08-1.64)  |                  | 1.22 (0.97-1.53)             |                  |
| P value                    | p<0.01             |                  | p=0.02                              |                  | p<0.01            |                  | p<0.01            |                  | p=0.08                       |                  |
| aHR (95% CI)**             | 1.17 (1.09-1.27)   |                  | 1.23 (1.02-1.47)                    |                  | 1.25 (1.08-1.46)  |                  | 1.33 (1.08-1.64)  |                  | 1.19 (0.95-1.50)             |                  |
| P value                    | p<0.01             |                  | p=0.03                              |                  | p<0.01            |                  | p<0.01            |                  | p=0.13                       |                  |
|                            | <b>Scleroderma</b> |                  | <b>All mental health conditions</b> |                  | <b>Depression</b> |                  | <b>Anxiety</b>    |                  | <b>Severe mental illness</b> |                  |
|                            | Exposed            | Unexposed        | Exposed                             | Unexposed        | Exposed           | Unexposed        | Exposed           | Unexposed        | Exposed                      | Unexposed        |
| Number of patients         | 64,337             | 251,067          | 45,237                              | 202,163          | 50,883            | 216,746          | 54,756            | 229,068          | 63,137                       | 248,256          |
| Number of outcomes, n(%)   | 16 (0.02)          | 45 (0.02)        | 5,296 (11.71)                       | 16,758 (8.29)    | 4,197 (8.25)      | 12,706 (5.86)    | 3,331 (6.08)      | 9,230 (4.03)     | 400 (0.63)                   | 925 (0.37)       |
| Person-years               | 430,156            | 1,580,157        | 275,375                             | 1,184,298        | 318,974           | 1,299,096        | 345,927           | 1,386,791        | 421,760                      | 1,561,193        |
| IR (per 1000 person-years) | 0.04               | 0.03             | 19.23                               | 14.15            | 13.16             | 9.78             | 9.63              | 6.66             | 0.95                         | 0.59             |
| Follow-up, Median(IQR)     | 5.63 (2.46-10.11)  | 5.17 (2.15-9.51) | 4.93 (2.08-9.21)                    | 4.61 (1.89-8.87) | 5.14 (2.19-9.48)  | 4.77 (1.96-9.10) | 5.23 (2.23-9.53)  | 4.88 (2.02-9.17) | 5.62 (2.46-10.10)            | 5.16 (2.14-9.51) |
| HR (95% CI)*               | 1.30 (0.74-2.31)   |                  | 1.36 (1.32-1.41)                    |                  | 1.35 (1.31-1.40)  |                  | 1.45 (1.39-1.51)  |                  | 1.61 (1.43-1.81)             |                  |
| P value                    | p=0.36             |                  | p<0.01                              |                  | p<0.01            |                  | p<0.01            |                  | p<0.01                       |                  |
| aHR (95% CI)**             | 1.32 (0.75-2.35)   |                  | 1.37 (1.33-1.42)                    |                  | 1.36 (1.31-1.41)  |                  | 1.44 (1.38-1.50)  |                  | 1.59 (1.41-1.79)             |                  |
| P value                    | p=0.34             |                  | p<0.01                              |                  | p<0.01            |                  | p<0.01            |                  | p<0.01                       |                  |

\* Unadjusted hazard ratio, IR: incidence rate, HR: hazard ratio, aHR: adjusted hazard ratio

\*\* Adjusted hazard ratio: adjusted for age, sex, body mass index, Townsend deprivation index, smoking status and ethnicity at baseline

## Sensitivity analysis: Incident only cohort

Of the total exposed cohort, 31,968 (49.7% of total exposed cohort) patients had an exposure code entered during the study period (incident cohort) and were matched to 126,278 (50.3% of total unexposed cohort) unexposed cohort (baseline characteristics in **eTable 2**). The median follow-up in this cohort was 3.4 years. The average age was 49 years, 43% of cohort were male and the proportion of obese patients, current smokers and deprivation quintiles were similar with the primary analysis.

In the incident only sensitivity analysis, the odds ratio of having chronic disease were similar to the primary cohort. There was an increased aOR of having CVD (1.42; 95% CI 1.36-1.49), CMD (1.14; 95% CI 1.10-1.19), AID (1.26; 95% CI 1.21-1.32) and MIH (1.71; 95% CI 1.66-1.76). Further details in appendix (**eTable 3**). When examining subsequent disease outcomes, there also remained an increased risk (described as an aHR) of developing CVD (1.17; 95% CI 1.10-1.24), CMD (1.07; 95% CI 1.02-1.12), AID (1.48; 95% CI 1.37-1.59) and MIH (1.47; 95% CI 1.40-1.53). Further details in appendix (**eTable 4**).

## Sensitivity analysis: Periodontitis only cohort

When restricting the analysis to only those with periodontitis, the exposed cohort of 3,384 patients (5.3% of the total exposed group) were matched to 12,893 patients (5.1% of the unexposed group). The median follow-up in this cohort was 3.6 years. The average age was 48 years, 46% of cohort were male and the proportion of other baseline characteristics were also similar to the primary analysis. Further details in appendix (**eTable 5**).

In this analysis, the odds ratio of having chronic disease were similar to the primary cohort. There was an increased aOR of having CVD (1.50; 95% CI 1.30-1.74), CMD (1.19; 95% CI 1.06-1.34), AID (1.32; 95% CI 1.15-1.52) and MIH (1.63; 95% CI 1.49-1.78). Further details can be seen in appendix (**eTable 6**). When examining subsequent disease outcomes, an increased risk (aHR) remained for developing CVD (1.31; 95% CI 1.12-1.52) and MIH (1.33; 95% CI 1.16-1.52) but not for CMD (0.96; 95% CI 0.85-1.10) and AID (1.21; 95% CI 0.96-1.51). Further details demonstrated in appendix (**eTable 7**).

## DISCUSSION

### Summary of key results

To our knowledge, this is the first attempt to synthesise data exploring the relationship between periodontal diseases and the development of chronic disease in a UK retrospective cohort derived from medical records. Our study demonstrates that the presence of a GP recorded diagnosis of a periodontal disease is associated with an 18%, 7% (Although 26% risk of T2DM), 33% and 37% increased risk of CVD, CMD, AID and MIH respectively. This risk persisted when analysing patients who were diagnosed with a periodontal disease during the study period. However, in patients specifically with periodontitis, this risk was not evident for CMD or AID.

### Results in context of current literature

To date, research evaluating the association between periodontal diseases and systemic health has focussed on periodontitis, rather than gingivitis, due to the more extensive inflammatory process and thus the potential for greater systemic effects.

This study concurs with the extensive literature highlighting the association of atherosclerotic diseases with periodontal disease. Humphrey et al, demonstrated a risk ratio of 1.24 (95 % CI 1.01 – 1.51) of a CVD/CHD event in the presence of periodontitis.<sup>54</sup> More recently a systematic review by Dietrich et al, demonstrated there was an increased risk of CVD when considering various periodontal disease measures ranging from probing pocket depth measurements to radiographic assessments of bone levels.<sup>55</sup> For those studies where severe periodontitis was the exposure, the associations with ACVD were stronger than in our study. This may be due to limitations in our coding, whereby we were unable to classify the severity of periodontitis.



1  
2  
3 There are several potential mechanisms explaining the increase in atherosclerosis in  
4 patients with periodontitis. Firstly, transient bacteraemia in patients with periodontitis may  
5 be pathogenic.<sup>56</sup> Furthermore, periodontitis patients have elevated circulating levels of pro-  
6 inflammatory mediators implicated in atherosclerosis.<sup>57</sup> There is robust evidence that  
7 treatment of periodontitis improves markers of systemic inflammation and surrogate  
8 markers of CVD risk such as flow-mediated dilatation.<sup>58,59</sup>

9  
10  
11  
12  
13  
14  
15 T2DM demonstrates a bi-directional relationship with periodontitis i.e. poorly controlled  
16 diabetes is a risk factor for periodontitis and periodontitis itself impacts the diabetes disease  
17 process. A systematic review commissioned by the International Diabetes Federation and  
18 EFP<sup>60</sup> concluded that individuals with periodontitis have a greater risk of developing T2DM  
19 with a HR 1.19–1.33 which is in agreement with the increased aHR demonstrated in this  
20 study. Literature also exists investigating the impact of periodontal therapy on diabetic  
21 outcomes. A recent review demonstrates reductions in HbA1c (-0.40% at 3 months)  
22 following periodontal therapy.<sup>61</sup> Evidence suggests appropriate targeted screening in dental  
23 settings may successfully identify cases of undiagnosed diabetes.<sup>62,63</sup> Within the UK there is  
24 a drive to utilise the dental team in identifying and managing T2DM, evident by the recent  
25 publication of the NHS England Commissioning Standard '*Dental Care for People with*  
26 *Diabetes*'.<sup>64</sup> This document proposes a formalised pathway between general medical  
27 practitioner and dentist upon diagnosis of T2DM.

28  
29  
30  
31  
32  
33  
34  
35  
36  
37  
38  
39  
40 Whilst the evidence base for T2DM is long established, there is limited evidence that Type 1  
41 Diabetes (T1DM) demonstrates a similar relationship. Systematic reviews conducted in 2013  
42 and 2018 were unable to find any studies that met eligibility criteria investigating the  
43 association between periodontal health and T1DM.<sup>60,65</sup> The reason for this may be that the  
44 age of periodontal disease diagnosis is typically much older than the age of T1DM diagnosis  
45 which limits the available data to answer such a question. Our study suggests an increased  
46 risk for incident Type 1 Diabetes in patients with a periodontal disease (aHR 1.80; CI 1.47-  
47 2.20) but was not clearly evident when considering only those patients with periodontitis  
48 (aHR 1.62; CI 0.70-3.76).

49  
50  
51  
52  
53  
54  
55  
56  
57  
58  
59  
60  
The mechanisms connecting mental health with periodontal inflammation include both  
behavioural and immunological. Existing literature focuses on depression and anxiety as risk

1  
2  
3 factors for periodontitis. Individuals under increased stress may reduce health promoting  
4 behaviours (e.g. optimal oral hygiene practices) and instead be driven towards detrimental  
5 health behaviours (e.g. smoking). The research linking depression as a risk factor for  
6 periodontitis has been contradictory.<sup>66</sup>  
7  
8  
9

10  
11 Conversely, studies assessing mental health outcomes consequent upon periodontal  
12 diseases are sparse. Potential mechanisms underlying such a relation include psychological  
13 mechanisms with outcomes of periodontal diseases (e.g. halitosis, loss of teeth, drifting of  
14 teeth) impacting negatively on social and functional aspects of life, thus impacting on mood.  
15 One study utilised the well-established EuroQoL questionnaire to review oral health in  
16 relation to anxiety/depression. In 10% of individuals with increased probing pocket depth  
17 ( $\geq 6$ mm) anxiety/depression was experienced 25% of the time.<sup>67</sup> Our study demonstrates a  
18 significantly increased risk of all mental health illnesses in patients with a periodontal  
19 disease (aOR 1.79; CI 1.75-1.83) and an increased risk of developing a mental health  
20 condition (aHR 1.37; CI 1.33-1.42). Whilst severe mental illness in particular did not  
21 demonstrate a significant increase in the incident only analysis of the periodontitis cohort,  
22 we found that individuals with periodontitis have a 37% increased risk of developing  
23 anxiety. Furthermore, within the same periodontitis cohort there was a significantly higher  
24 risk of developing depression (aHR 1.29; CI 1.11-1.50). This provides further evidence for the  
25 potential psychosocial impact of periodontal diseases and an issue that is under-reported in  
26 the literature.  
27  
28  
29  
30  
31  
32  
33  
34  
35  
36  
37  
38  
39  
40  
41

42 Of the autoimmune conditions included within our analysis, the one most frequently  
43 reported in the context of periodontitis is RA. A number of mechanisms have been proposed  
44 linking the periodontium with the progression of RA. For example *P. gingivalis*, expresses  
45 peptidyl arginine deiminases (PADs), which drive protein citrullination. Exposure to  
46 citrullinated proteins in periodontitis patients may then lead to the generation of anti-  
47 citrullinated protein antibodies (ACPA), stimulating a systemic autoimmune response  
48 characteristic of RA.<sup>33</sup> A study analysing the third US National Health and Nutrition  
49 Examination Survey (NHANES III) identified that individuals with RA were more likely to  
50 present with both periodontitis (OR 1.82; CI 1.04 – 3.20) and edentulism (OR 2.27; CI 1.56 –  
51 3.31).<sup>68</sup> Our data support an association between periodontal diseases and development of  
52  
53  
54  
55  
56  
57  
58  
59  
60

1  
2  
3 RA. For periodontitis alone, the increased risk of RA at baseline approached significance,  
4 although no significant risk was identified for subsequent development of RA. This may be  
5 attributed to the low number of outcomes during this subset analysis and is in agreement  
6 with a previous study based on the Taiwanese National Health Insurance Research Database  
7 (NHIRD).<sup>69</sup> The Taiwanese study also demonstrated an increased risk of developing Sjogren's  
8 syndrome in patients with chronic periodontitis (CP) (HR 1.87; CI 1.64 – 2.13.)<sup>70</sup> Our study  
9 also demonstrates an increased risk of developing Sjogren's syndrome with periodontal  
10 diseases in general (HR 2.51; CI 1.87-3.38), with the periodontitis only cohort showing a  
11 substantial increased hazard ratio; however, the low number of outcomes means that the  
12 results must be interpreted with caution (aHR 6.67; CI 1.66-26.86).  
13  
14  
15  
16  
17  
18  
19  
20  
21  
22

## 23 Limitations

24  
25  
26 The primary limitation is that the validity of the results rely upon the accuracy of  
27 documentation by the healthcare professionals contributing to the dataset. To date, the  
28 accuracy of oral health read codes in primary care datasets have not been validated<sup>71</sup>.  
29 However, it is important to highlight that in the UK GPs are not usually the professionals  
30 responsible for diagnosing periodontal disease and this is typically identified by dental  
31 practitioners based on a clinical examination. Periodontal Read codes are thus likely to be  
32 inputted following receipt of clinical letters from dental healthcare professional, though GP  
33 diagnosis and self-report are also possibilities. Overall, it is likely that there is under  
34 recording of periodontal diseases in this data set i.e. it is likely that patients with a  
35 periodontal disease are not recorded as having it. Therefore, it is possible our findings may  
36 not reflect the true effect size and are likely to be an underestimate. On the other hand,  
37 selective recording of severe periodontal disease might have led to an overestimation of the  
38 true effect size.  
39  
40  
41  
42  
43  
44  
45  
46  
47  
48  
49  
50

## 51 Conclusion

52  
53  
54 In conclusion, this study demonstrates that periodontal diseases (including gingivitis and  
55 periodontitis) are associated with an increased risk of developing cardiovascular,  
56 cardiometabolic, autoimmune diseases and mental ill health. With this in mind, it is  
57  
58  
59  
60

1  
2  
3 important to highlight patients with periodontal diseases and to tackle risk factors to  
4 prevent the development and progression of such conditions. An important implication of  
5 our findings is the need for effective communication between dental and other health care  
6 professionals to ensure patients obtain an effective treatment plan targeting both oral and  
7 extra-oral health to improve current health and reduce the risk of future ill health.  
8  
9  
10  
11  
12  
13  
14  
15  
16  
17  
18  
19  
20  
21  
22  
23  
24

## 25 Figure legends

26  
27  
28  
29  
30 **Figure 1: Forest plots showing odds ratios at baseline for chronic diseases in patients**  
31 **exposed to periodontal diseases compared to unexposed patients**

32  
33  
34 **Figure 2: Forest plots showing hazard ratios for subsequent development of chronic**  
35 **diseases in patients exposed to periodontal diseases compared with unexposed patients.**  
36  
37  
38  
39

## 40 References

- 41  
42  
43  
44 1 GBD 2017 Disease and Injury Incidence and Prevalence Collaborators SL, Abate D,  
45 Abate KH, Abay SM, Abbafati C, Abbasi N *et al*. Global, regional, and national  
46 incidence, prevalence, and years lived with disability for 354 diseases and injuries for  
47 195 countries and territories, 1990-2017: a systematic analysis for the Global Burden  
48 of Disease Study 2017. *Lancet (London, England)* 2018; **392**: 1789–1858.  
49  
50  
51 2 Kinane DF, Stathopoulou PG, Papapanou PN. Periodontal diseases. *Nat. Rev. Dis.*  
52 *Prim.* 2017; **3**: 1–14.  
53  
54 3 Centers for Disease Control and Prevention. Periodontal Disease.  
55 2013.<https://www.cdc.gov/oralhealth/conditions/periodontal-disease.html> (accessed  
56 30 Sep2020).  
57  
58  
59  
60

- 1  
2  
3  
4 4 Mombelli A, Casagni F, Madianos PN. Can presence or absence of periodontal  
5 pathogens distinguish between subjects with chronic and aggressive periodontitis? A  
6 systematic review. *J. Clin. Periodontol.* 2002; **29**: 10–21.  
7  
8 5 Kinane DF, Demuth DR, Gorr SU, Hajishengallis GN, Martin MH. Human variability in  
9 innate immunity. *Periodontol 2000* 2007; **45**: 14–34.  
10  
11 6 Hajishengallis G, Lamont RJ. Beyond the red complex and into more complexity: The  
12 polymicrobial synergy and dysbiosis (PSD) model of periodontal disease etiology. *Mol*  
13 *Oral Microbiol* 2012; **27**: 409–419.  
14  
15  
16 7 Gift HC, Reisine ST, Larach DC. The social impact of dental problems and visits. *Am J*  
17 *Public Health* 1992; **82**: 1663–1668.  
18  
19 8 Slade GD. *Measuring Oral Health and Quality of Life*. 1997.  
20  
21 9 Miller AH, Raison CL. The role of inflammation in depression: From evolutionary  
22 imperative to modern treatment target. *Nat. Rev. Immunol.* 2016; **16**: 22–34.  
23  
24  
25 10 Dantzer R, O'Connor JC, Lawson MA, Kelley KW. Inflammation-associated depression:  
26 From serotonin to kynurenine. *Psychoneuroendocrinology.* 2011; **36**: 426–436.  
27  
28 11 Fan X, Goff DC, Henderson DC. Inflammation and schizophrenia. *Expert Rev.*  
29 *Neurother.* 2007; **7**: 789–796.  
30  
31  
32 12 Calle MC, Fernandez ML. Inflammation and type 2 diabetes. *Diabetes Metab.* 2012;  
33 **38**: 183–191.  
34  
35  
36 13 Berg AH, Scherer PE. Adipose tissue, inflammation, and cardiovascular disease. *Circ.*  
37 *Res.* 2005; **96**: 939–949.  
38  
39 14 GBD 2017 Causes of Death Collaborators GA, Abate D, Abate KH, Abay SM, Abbafati  
40 C, Abbasi N *et al.* Global, regional, and national age-sex-specific mortality for 282  
41 causes of death in 195 countries and territories, 1980-2017: a systematic analysis for  
42 the Global Burden of Disease Study 2017. *Lancet (London, England)* 2018; **392**: 1736–  
43 1788.  
44  
45  
46 15 Postolache TT, Makkar H, Wadhawan A, Dagdag A, Reynolds MA, Merchant AT.  
47 Periodontal, metabolic, and cardiovascular disease: Exploring the role of  
48 inflammation and mental health. *Pteridines.* 2018; **29**: 124–163.  
49  
50  
51 16 Chandan JS, Thomas T. The impact of inflammatory bowel disease on oral health. *Br*  
52 *Dent J* 2017; **222**: 549–553.  
53  
54 17 Thomas T, Chandan JS. Multidisciplinary management: Inflammatory bowel disease.  
55 *Br. Dent. J.* 2017; **222**: 4–5.  
56  
57 18 Linden GJ, Linden K, Yarnell J, Evans A, Kee F, Patterson CC. All-cause mortality and  
58 periodontitis in 60-70-year-old men: a prospective cohort study. *J Clin Periodontol*  
59  
60

- 2012; **39**: 940–946.
- 19 Kinane DF, Chestnutt IG. Smoking and Periodontal Disease. *Crit Rev Oral Biol Med* 2000; **11**: 356–365.
- 20 Kassebaum NJ, Bernabé E, Dahiya M, Bhandari B, Murray CJL, Marcenes W. Global burden of severe periodontitis in 1990–2010: A systematic review and meta-regression. *J. Dent. Res.* 2014; **93**: 1045–1053.
- 21 Eke PI, Wei L, Thornton-Evans GO, Borrell LN, Borgnakke WS, Dye B *et al.* Risk Indicators for Periodontitis in US Adults: NHANES 2009 to 2012. *J Periodontol* 2016; **87**: 1174–1185.
- 22 Eke PI, Dye BA, Wei L, Thornton-Evans GO, Genco RJ. Prevalence of periodontitis in adults in the united states: 2009 and 2010. *J Dent Res* 2012; **91**: 914–920.
- 23 Lockhart PB, Bolger AF, Papapanou PN, Osinbowale O, Trevisan M, Levison ME *et al.* Periodontal disease and atherosclerotic vascular disease: Does the evidence support an independent association?: A scientific statement from the American heart association. *Circulation* 2012; **125**: 2520–2544.
- 24 Lafon A, Pereira B, Dufour T, Rigouby V, Giroud M, Béjot Y *et al.* Periodontal disease and stroke: a meta-analysis of cohort studies. *Eur J Neurol* 2014; **21**: 1155–e67.
- 25 Leng WD, Zeng XT, Kwong JSW, Hua XP. Periodontal disease and risk of coronary heart disease: An updated meta-analysis of prospective cohort studies. *Int J Cardiol* 2015; **201**: 469–472.
- 26 Sanz M, Marco del Castillo A, Jepsen S, Gonzalez-Juanatey JR, D’Aiuto F, Bouchard P *et al.* Periodontitis and cardiovascular diseases: Consensus report. *J Clin Periodontol* 2020. doi:10.1111/jcpe.13189.
- 27 D’Aiuto F, Gkraniias N, Bhowruth D, Khan T, Orlandi M, Suvan J *et al.* Systemic effects of periodontitis treatment in patients with type 2 diabetes: a 12 month, single-centre, investigator-masked, randomised trial. *Lancet Diabetes Endocrinol* 2018; **6**: 954–965.
- 28 Seitz MW, Listl S, Bartols A, Schubert I, Blaschke K, Haux C *et al.* Current Knowledge on Correlations Between Highly Prevalent Dental Conditions and Chronic Diseases: An Umbrella Review. *Prev Chronic Dis* 2019; **16**: 180641.
- 29 Engebretson S, Kocher T. Evidence that periodontal treatment improves diabetes outcomes: a systematic review and meta-analysis. *J Clin Periodontol* 2013; **40**: S153–S163.
- 30 D’Aiuto F, Gable D, Syed Z, Allen Y, Wanyonyi KL, White S *et al.* Evidence summary: The relationship between oral diseases and diabetes. *Br Dent J* 2017; **222**: 944–948.
- 31 Bingham CO, Moni M. Periodontal disease and rheumatoid arthritis: The evidence accumulates for complex pathobiologic interactions. *Curr. Opin. Rheumatol.* 2013; **25**:

- 345–353.
- 32 Lin CY, Tseng CF, Liu JM, Chuang HC, Lei W Te, Liu LYM *et al.* Association between periodontal disease and subsequent sjögren's syndrome: A nationwide population-based cohort study. *Int J Environ Res Public Health* 2019; **16**. doi:10.3390/ijerph16050771.
- 33 de Pablo P, Chapple ILC, Buckley CD, Dietrich T. Periodontitis in systemic rheumatic diseases. *Nat Rev Rheumatol* 2009; **5**: 218–224.
- 34 Patel N, Milward M. The oral implications of mental health disorders part 2: depression. *Dent Update* 2019; **46**: 119–124.
- 35 Kisely S, Sawyer E, Siskind D, Lalloo R. The oral health of people with anxiety and depressive disorders - A systematic review and meta-analysis. *J. Affect. Disord.* 2016; **200**: 119–132.
- 36 Blak BT, Thompson M, Dattani H, Bourke A. Generalisability of The Health Improvement Network (THIN) database: demographics, chronic disease prevalence and mortality rates. *Inform Prim Care* 2011; **19**: 251–5.
- 37 Booth N. What are the Read Codes? *Health Libr Rev* 1994; **11**: 177–82.
- 38 Maguire A, Blak BT, Thompson M. The importance of defining periods of complete mortality reporting for research using automated data from primary care. *Pharmacoepidemiol Drug Saf* 2009; **18**: 76–83.
- 39 Horsfall L, Walters K, Petersen I. Identifying periods of acceptable computer usage in primary care research databases. *Pharmacoepidemiol Drug Saf* 2013; **22**: 64–69.
- 40 Gokhale KM, Chandan JS, Toulis K, Gkoutos G, Tino P, Nirantharakumar K. Data extraction for epidemiological research (DExtER): a novel tool for automated clinical epidemiology studies. *Eur J Epidemiol* 2020. doi:10.1007/s10654-020-00677-6.
- 41 Chandan JS, Keerthy D, Zemedikun DT, Okoth K, Gokhale KM, Raza K *et al.* The association between exposure to childhood maltreatment and the subsequent development of functional somatic and visceral pain syndromes. *EClinicalMedicine* 2020; **0**: 100392.
- 42 Chandan JS, Thomas T, Bradbury-Jones C, Taylor J, Bandyopadhyay S, Nirantharakumar K. Intimate partner violence and temporomandibular joint disorder. *J Dent* 2019; **82**: 98–100.
- 43 NHS Digital. Quality and Outcomes Framework (QOF) business rules v42 2019-2020 baseline release - NHS Digital. 2019. <https://digital.nhs.uk/data-and-information/data-collections-and-data-sets/data-collections/quality-and-outcomes-framework-qof/quality-and-outcome-framework-qof-business-rules/quality-and-outcomes-framework-qof-business-rules-v42-2019-2020-baseline-releas> (accessed 31 Jul2019).



- 1  
2  
3  
4 44 Krishna MT, Subramanian A, Adderley NJ, Zemedikun DT, Gkoutos G V.,  
5 Nirantharakumar K. Allergic diseases and long-term risk of autoimmune disorders:  
6 Longitudinal cohort study and cluster analysis. *Eur Respir J* 2019; **54**.  
7 doi:10.1183/13993003.00476-2019.  
8
- 9 45 Chandan JS, Thomas T, Gokhale KM, Bandyopadhyay S, Taylor J, Nirantharakumar K.  
10 The burden of mental ill health associated with childhood maltreatment in the UK,  
11 using The Health Improvement Network database: a population-based retrospective  
12 cohort study. *The Lancet Psychiatry* 2019; **6**: 926–934.  
13
- 14 46 Chandan JS, Thomas T, Bradbury-Jones C, Russell R, Bandyopadhyay S,  
15 Nirantharakumar K *et al*. Female survivors of intimate partner violence and risk of  
16 depression, anxiety and serious mental illness. *Br J Psychiatry* 2019; : 1–6.  
17
- 18 47 Chandan JS, Thomas T, Bradbury-Jones C, Taylor J, Bandyopadhyay S,  
19 Nirantharakumar K. Risk of Cardiometabolic Disease and All-Cause Mortality in  
20 Female Survivors of Domestic Abuse. *J Am Heart Assoc* 2020; **9**.  
21 doi:10.1161/JAHA.119.014580.  
22
- 23 48 Chandan JS, Okoth K, Gokhale KM, Bandyopadhyay S, Taylor J, Nirantharakumar K.  
24 Increased Cardiometabolic and Mortality Risk Following Childhood Maltreatment in  
25 the United Kingdom. *J Am Heart Assoc* 2020; **9**. doi:10.1161/JAHA.119.015855.  
26
- 27 49 Chandan JS, Thomas T, Lee S, Marshall T, Willis B, Nirantharakumar K *et al*. The  
28 association between idiopathic thrombocytopenic purpura and cardiovascular  
29 disease: a retrospective cohort study. *J Thromb Haemost* 2018; **16**: 474–480.  
30
- 31 50 Thomas T, Chandan JS, Subramanian A, Gokhale K, Gkoutos G, Harper L *et al*.  
32 Epidemiology, morbidity and mortality in Behçet’s disease: a cohort study using The  
33 Health Improvement Network (THIN). *Rheumatology* 2020.  
34 doi:10.1093/rheumatology/keaa010.  
35
- 36 51 Goel R, Chandan JS, Thayakaran R, Adderley NJ, Nirantharakumar K, Harper L.  
37 Cardiovascular and renal morbidity in Takayasu arteritis: a population-based  
38 retrospective cohort study from UK. *Arthritis Rheumatol* 2020; : art.41529.  
39
- 40 52 Townsend P, Phillimore P, Beattie A. Health and deprivation: inequality and the  
41 North. 1988. *London Croom Helm Google Sch* 1988.  
42
- 43 53 Lévesque LE, Hanley JA, Kezouh A, Suissa S. Problem of immortal time bias in cohort  
44 studies: example using statins for preventing progression of diabetes. *BMJ* 2010; **340**:  
45 b5087.  
46
- 47 54 Humphrey LL, Fu R, Buckley DI, Freeman M, Helfand M. Periodontal Disease and  
48 Coronary Heart Disease Incidence: A Systematic Review and Meta-analysis. *J Gen  
49 Intern Med* 2008; **23**: 2079–2086.  
50
- 51 55 Dietrich T, Sharma P, Walter C, Weston P, Beck J. The epidemiological evidence  
52 behind the association between periodontitis and incident atherosclerotic  
53  
54  
55  
56  
57  
58  
59  
60



- 1  
2  
3 cardiovascular disease. *J Clin Periodontol* 2013; **40**: S70–S84.  
4  
5  
6 56 Haraszthy VI, Zambon JJ, Trevisan M, Zeid M, Genco RJ. Identification of Periodontal  
7 Pathogens in Atheromatous Plaques. *J Periodontol* 2000; **71**: 1554–1560.  
8  
9 57 Paraskevas S, Huizinga JD, Loos BG. A systematic review and meta-analyses on C-  
10 reactive protein in relation to periodontitis. *J Clin Periodontol* 2008; **35**: 277–290.  
11  
12 58 D’Aiuto F, Orlandi M, Gunsolley JC. Evidence that periodontal treatment improves  
13 biomarkers and CVD outcomes. *J Clin Periodontol* 2013; **40**: S85–S105.  
14  
15 59 Tonetti MS, D’Aiuto F, Nibali L, Donald A, Storry C, Parkar M *et al.* Treatment of  
16 Periodontitis and Endothelial Function. *N Engl J Med* 2007; **356**: 911–920.  
17  
18  
19 60 Graziani F, Gennai S, Solini A, Petrini M. A systematic review and meta-analysis of  
20 epidemiologic observational evidence on the effect of periodontitis on diabetes An  
21 update of the EFP-AAP review. *J Clin Periodontol* 2018; **45**: 167–187.  
22  
23 61 Madianos PN, Koromantzou PA. An update of the evidence on the potential impact of  
24 periodontal therapy on diabetes outcomes. *J Clin Periodontol* 2018; **45**: 188–195.  
25  
26  
27 62 Lalla E, Kunzel C, Burkett S, Cheng B, Lamster IB. Identification of Unrecognized  
28 Diabetes and Pre-diabetes in a Dental Setting. *J Dent Res* 2011; **90**: 855–860.  
29  
30  
31 63 Genco RJ, Schifferle RE, Dunford RG, Falkner KL, Hsu WC, Balukjian J. Screening for  
32 diabetes mellitus in dental practices: A field trial. *J Am Dent Assoc* 2014; **145**: 57–64.  
33  
34 64 Commissioning Standard for Restorative Dentistry NHS England and NHS  
35 Improvement. .  
36  
37 65 Borgnakke WS, Ylöstalo P V., Taylor GW, Genco RJ. Effect of periodontal disease on  
38 diabetes: systematic review of epidemiologic observational evidence. *J Clin*  
39 *Periodontol* 2013; **40**: S135–S152.  
40  
41  
42 66 Araújo MM, Martins CC, Costa LCM, Cota LOM, Faria RLAM, Cunha FA *et al.*  
43 Association between depression and periodontitis: a systematic review and meta-  
44 analysis. *J Clin Periodontol* 2016; **43**: 216–228.  
45  
46  
47 67 Brennan DS, Spencer AJ, Roberts-Thomson KF. Quality of life and disability weights  
48 associated with periodontal disease. *J Dent Res* 2007; **86**: 713–7.  
49  
50  
51 68 De Pablo P, Dietrich T, McAlindon TE. Association of periodontal disease and tooth  
52 loss with rheumatoid arthritis in the US population. *J Rheumatol* 2008; **35**: 70–76.  
53  
54 69 Chen H-H, Huang N, Chen Y-M, Chen T-J, Chou P, Lee Y-L *et al.* Association between a  
55 history of periodontitis and the risk of rheumatoid arthritis: a nationwide, population-  
56 based, case–control study. *Ann Rheum Dis* 2013; **72**: 1206–1211.  
57  
58 70 Lin T-C, Tseng C-F, Wang Y-H, Yu H-C, Chang Y-C. Patients with chronic periodontitis  
59  
60

1  
2  
3 present increased risk for primary Sjögren syndrome: a nationwide population-based  
4 cohort study. *PeerJ* 2018; **6**. doi:10.7717/PEERJ.5109.  
5

- 6  
7 71 McBrien KA, Souri S, Symonds NE, Rouhi A, Lethebe BC, Williamson TS *et al*.  
8 Identification of validated case definitions for medical conditions used in primary care  
9 electronic medical record databases: a systematic review. *J Am Med Informatics*  
10 *Assoc* 2018; **25**: 1567–1578.  
11  
12  
13  
14  
15  
16  
17  
18  
19  
20  
21  
22  
23  
24  
25  
26  
27  
28  
29  
30  
31  
32  
33  
34  
35  
36  
37  
38  
39  
40  
41  
42  
43  
44  
45  
46  
47  
48  
49  
50  
51  
52  
53  
54  
55  
56  
57  
58  
59  
60

For peer review only

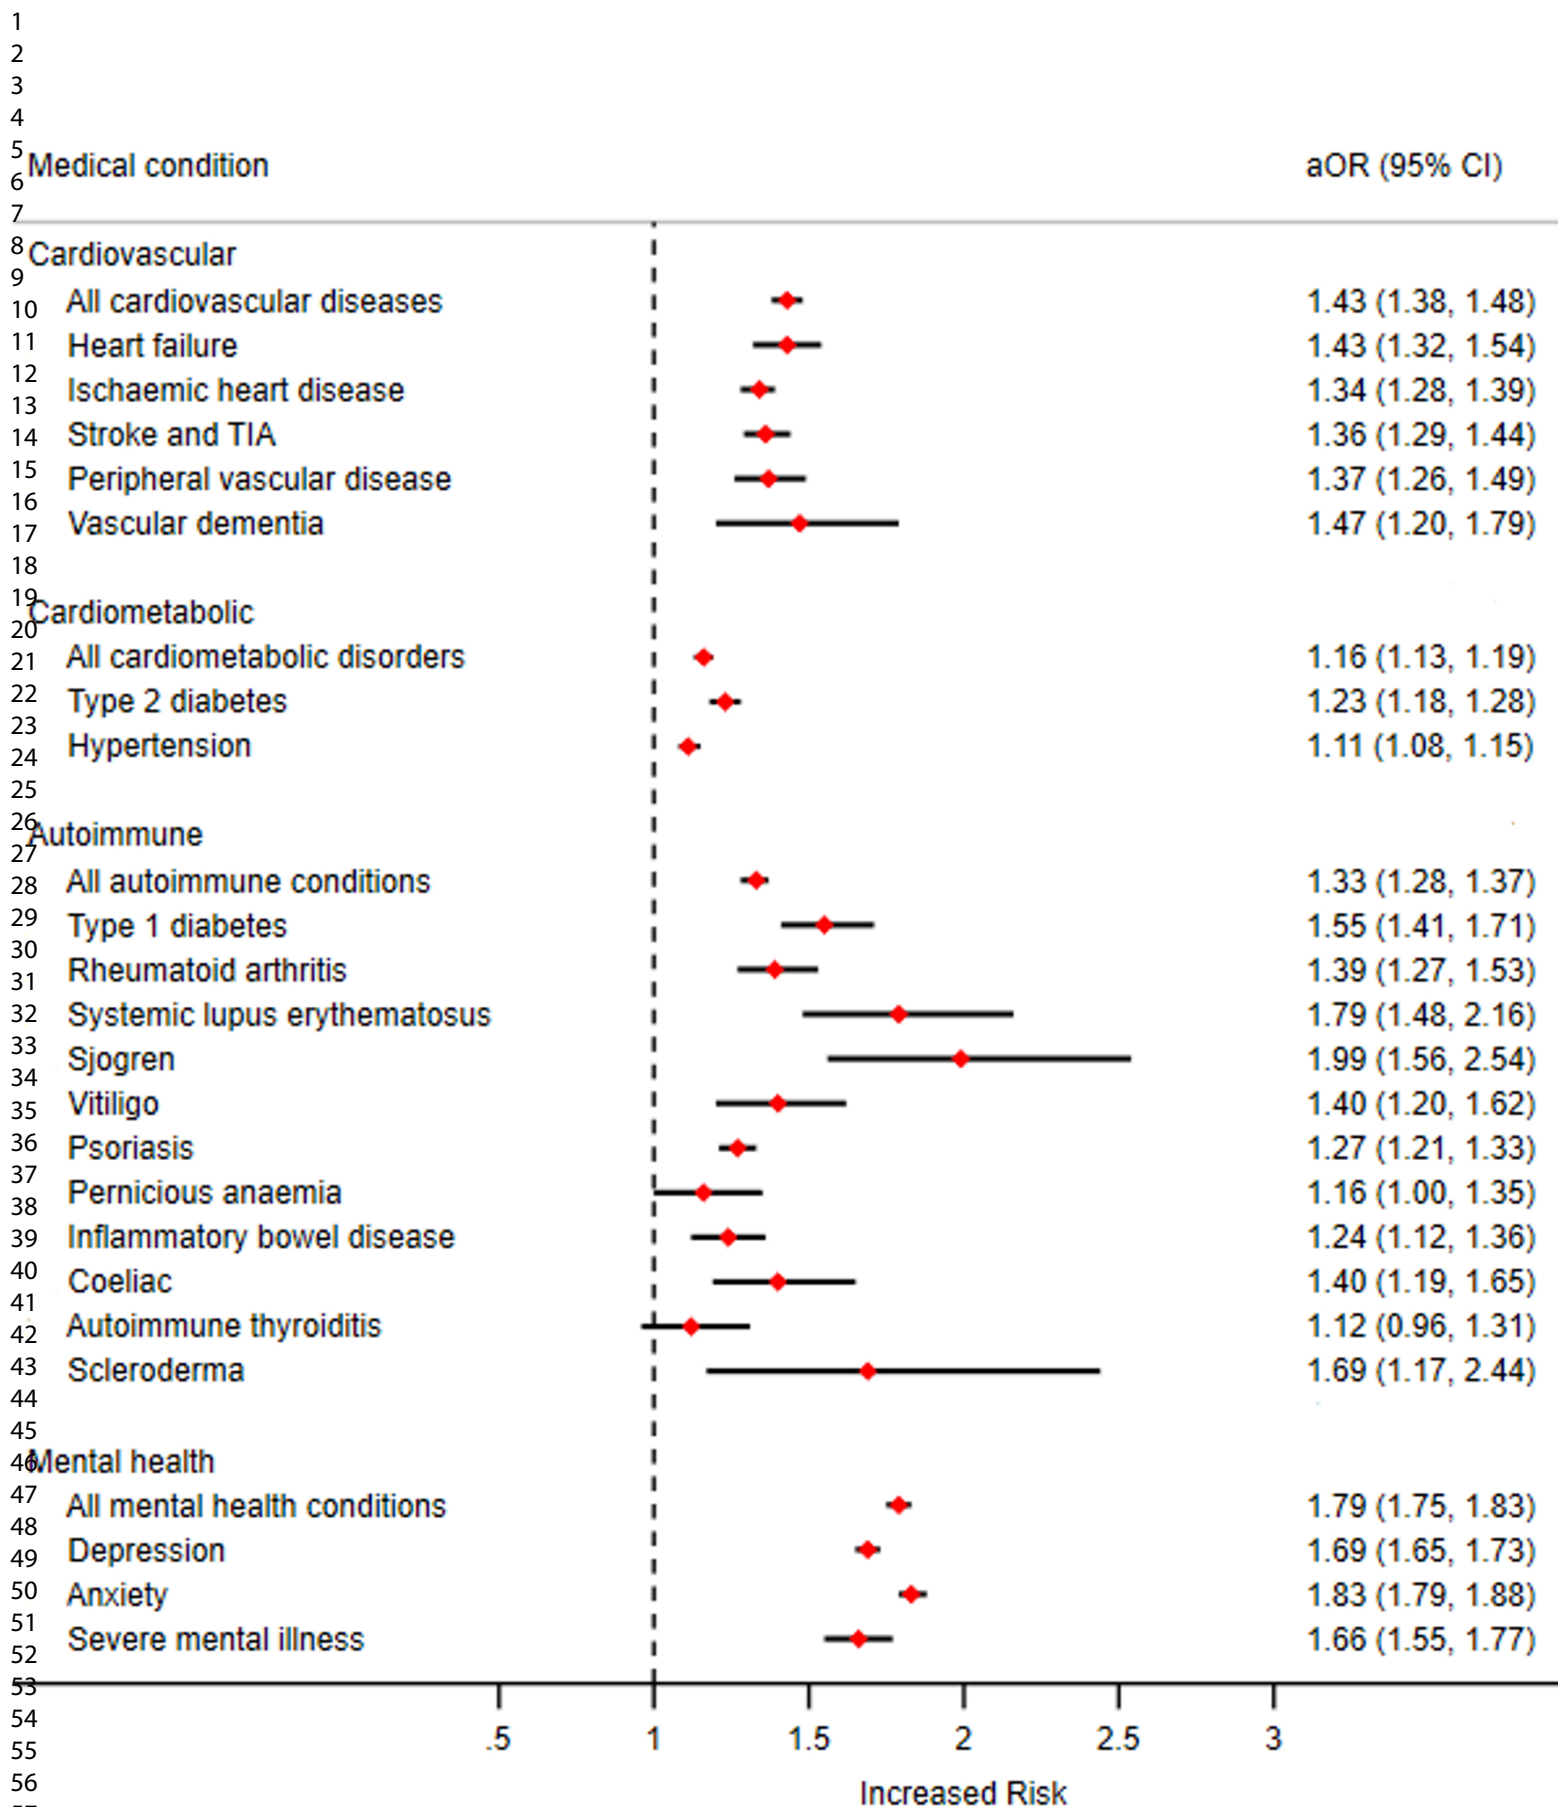

TIA: transient ischemic attack, aOR: adjusted odds ratio, CI: confidence interval

59  
60

1  
2  
3  
4  
5  
6  
7  
8  
9  
10  
11  
12  
13  
14  
15  
16  
17  
18  
19  
20  
21  
22  
23  
24  
25  
26  
27  
28  
29  
30  
31  
32  
33  
34  
35  
36  
37  
38  
39  
40  
41  
42  
43  
44  
45  
46  
47  
48  
49  
50  
51  
52  
53  
54  
55  
56  
57  
58  
59  
60

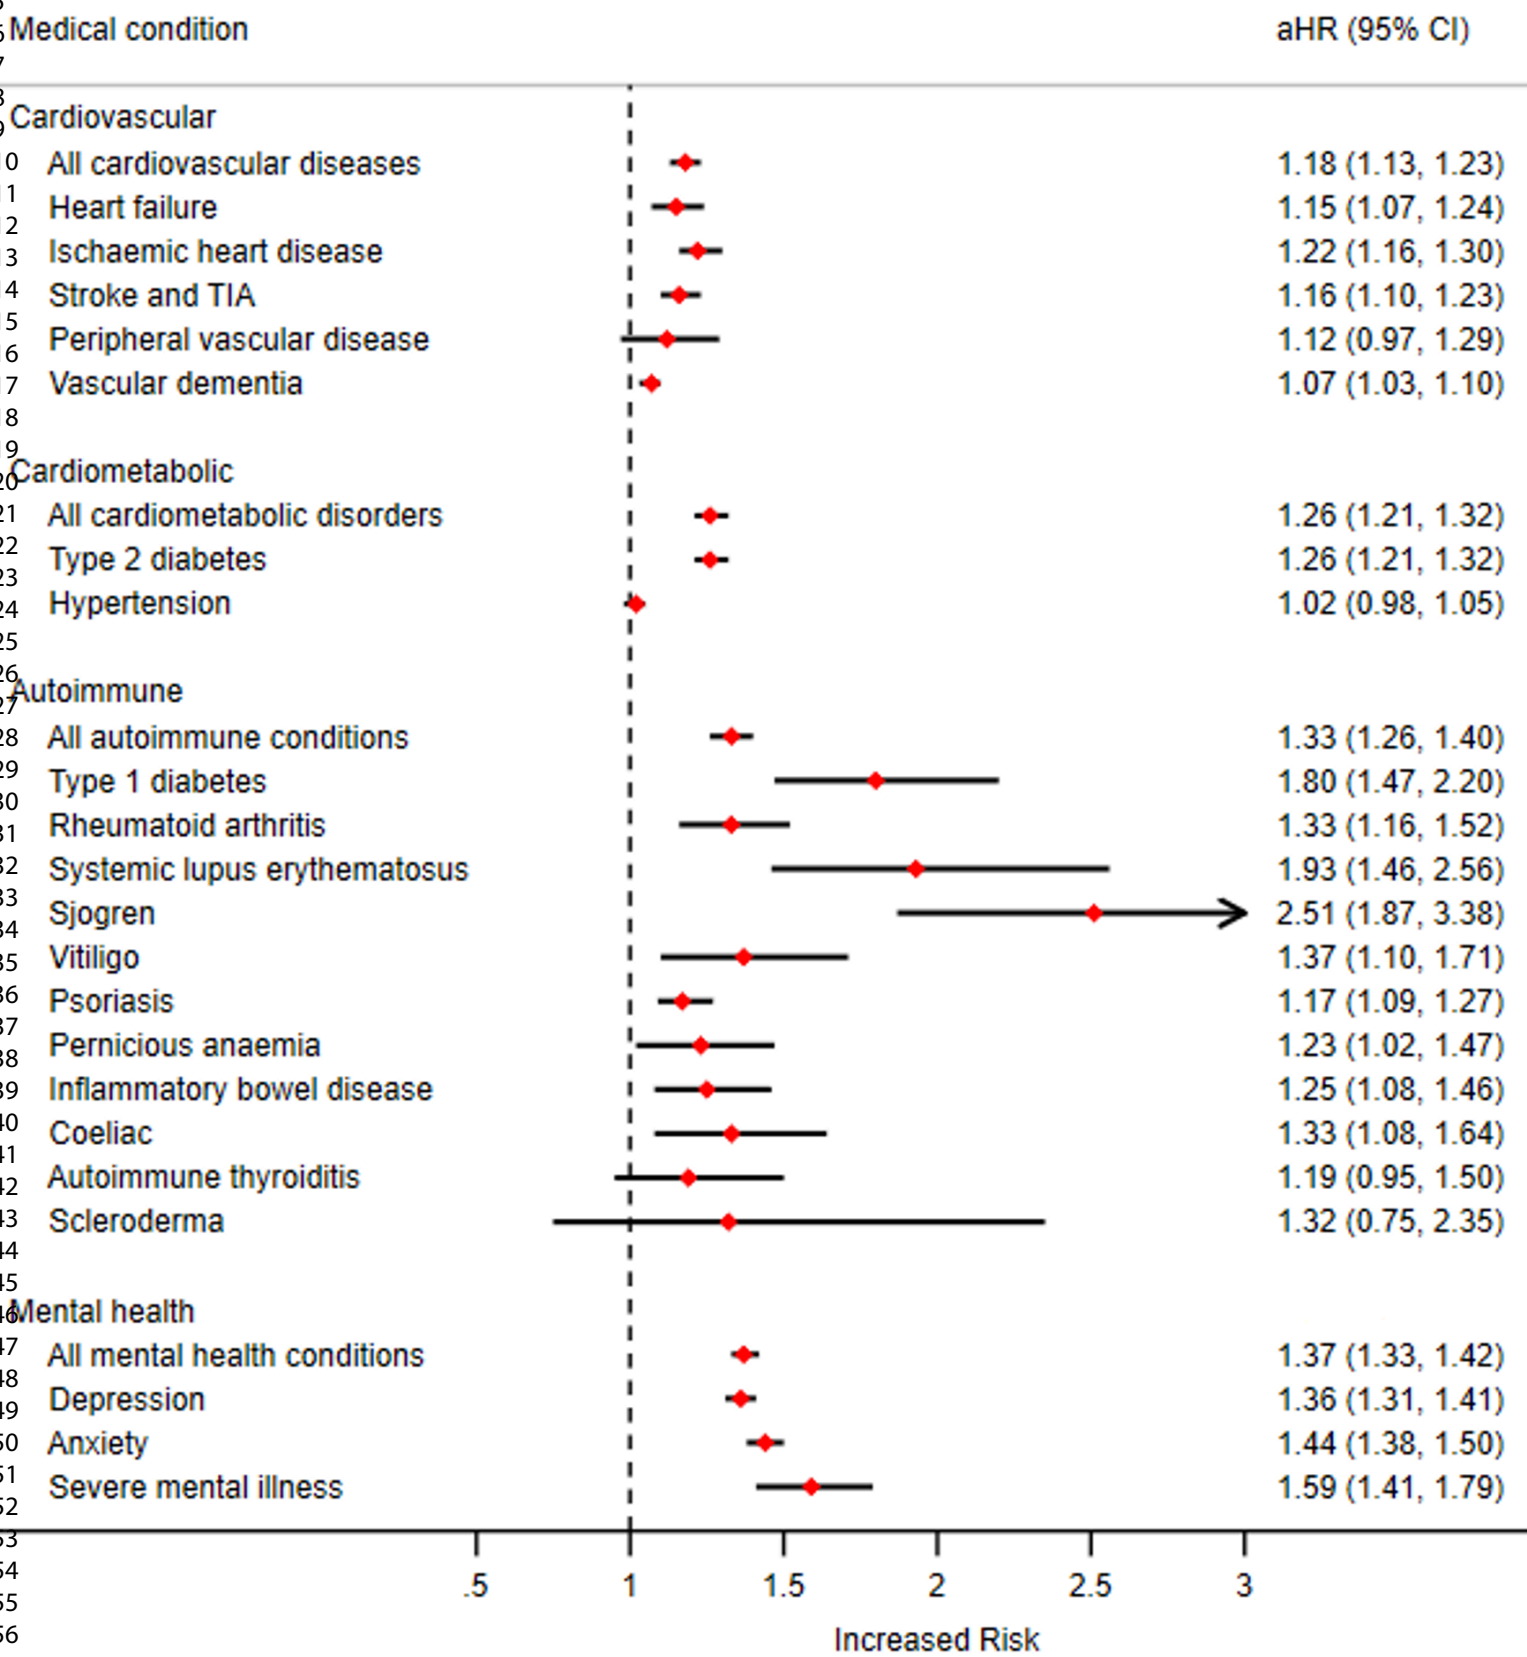

TIA: transient ischemic attack, aHR: adjusted hazard ratio, CI: confidence interval

## Supplementary materials

**eTable 1. Read codes for periodontal disease exposure.**

### Gingivitis

| Code    | Description                          |
|---------|--------------------------------------|
| 2552    | O/E - gingivitis                     |
| 2556    | O/E - bleeding gums                  |
| J031z00 | Chronic gingivitis NOS               |
| 1928    | Bleeding gums                        |
| J030.00 | Acute gingivitis                     |
| J031.11 | Gingivitis                           |
| J031.00 | Chronic gingivitis                   |
| J031300 | Hyperplastic gingivitis              |
| J031200 | Desquamative gingivitis              |
| J031100 | Ulcerative gingivitis                |
| J03..11 | Gingivitis/gingival disease          |
| J031000 | Simple marginal gingivitis           |
| J03z.00 | Gingival and periodontal disease NOS |

### Periodontitis

| Code    | Description                                    |
|---------|------------------------------------------------|
| J033200 | Paradental abscess                             |
| J034400 | Alveolar pyorrhoea                             |
| J033300 | Periodontal abscess                            |
| J03..12 | Periodontal disease                            |
| J033.00 | Acute periodontitis                            |
| 2553    | O/E - pyorrhoea                                |
| J051200 | Loss of teeth due to local periodontal disease |
| J034200 | Chronic periodontitis simplex                  |
| J033z00 | Acute periodontitis NOS                        |
| J034.00 | Chronic periodontitis                          |
| J035.00 | Periodontosis                                  |
| J034z00 | Chronic periodontitis NOS                      |

**eTable 2. Baseline characteristics of the incident OA cohort**

|                               | Incident cohort  |                    |
|-------------------------------|------------------|--------------------|
|                               | Exposed<br>n (%) | Unexposed<br>n (%) |
| All                           | (n=31,968)       | (n=126,278)        |
| Sex (Male)                    | 13715 (42.90)    | 54062 (42.81)      |
| Age at index date             | 48.77 (18.77)    | 48.59 (18.67)      |
| Age categories                |                  |                    |
| 18 - 24 years                 | 3788 (11.85)     | 15081 (11.94)      |
| 25 - 34 years                 | 4921 (15.39)     | 19604 (15.52)      |
| 35 - 44 years                 | 5381 (16.83)     | 21272 (16.85)      |
| 45 - 54 years                 | 5411 (16.93)     | 21518 (17.04)      |
| 55 - 64 years                 | 5124 (16.03)     | 20212 (16.01)      |
| 65 - 74 years                 | 4028 (12.60)     | 15908 (12.60)      |
| 75 & overs                    | 3315 (10.37)     | 12683 (10.04)      |
| BMI                           | 26.60 (5.73)     | 26.62 (5.62)       |
| BMI Categories                |                  |                    |
| Under/Normal weight (18.5-25) | 11755 (36.77)    | 45183 (35.78)      |
| Overweight (25-30)            | 8573 (26.82)     | 34623 (27.42)      |
| Obese (>30)                   | 6192 (19.37)     | 23359 (18.50)      |
| Missing                       | 5448 (17.04)     | 23113 (18.30)      |
| Townsend quintiles            |                  |                    |
| 1 (Least deprived)            | 5813 (18.18)     | 21910 (17.35)      |
| 2                             | 5346 (16.72)     | 19600 (15.52)      |
| 3                             | 6118 (19.14)     | 22190 (17.57)      |
| 4                             | 6079 (19.02)     | 21452 (16.99)      |
| 5 (Most deprived)             | 4810 (15.05)     | 15776 (12.49)      |
| Missing                       | 3802 (11.89)     | 25350 (20.07)      |
| Smoking categories            |                  |                    |
| Non-smoker                    | 14514 (45.40)    | 57617 (45.63)      |
| Smoker                        | 9452 (29.57)     | 37338 (29.57)      |
| Ex-smoker                     | 6494 (20.31)     | 25445 (20.15)      |
| Missing                       | 1508 (4.72)      | 5878 (4.65)        |
| Ethnicity                     |                  |                    |
| Caucasian                     | 11976 (37.46)    | 49505 (39.20)      |
| Mixed race                    | 229 (0.72)       | 764 (0.61)         |
| Other                         | 101 (0.32)       | 358 (0.28)         |
| Black                         | 509 (1.59)       | 1415 (1.12)        |
| South Asian                   | 1510 (4.72)      | 2154 (1.71)        |
| Missing                       | 17643 (55.19)    | 72082 (57.08)      |

**eTable 3. Risk of chronic diseases at baseline in the incident only sensitivity analysis cohort**

|                                                     | All cardiovascular disease |               | Heart failure               |                | Ischaemic heart disease      |              | Stroke/transient-ischaemic attack |                | Peripheral vascular disease |              |
|-----------------------------------------------------|----------------------------|---------------|-----------------------------|----------------|------------------------------|--------------|-----------------------------------|----------------|-----------------------------|--------------|
|                                                     | Exposed                    | Unexposed     | Exposed                     | Unexposed      | Exposed                      | Unexposed    | Exposed                           | Unexposed      | Exposed                     | Unexposed    |
| Total number of patients                            | 31,968                     | 126,278       | 31,968                      | 126,278        | 31,968                       | 126,278      | 31,968                            | 126,278        | 31,968                      | 126,278      |
| Number of patients with condition at baseline, n(%) | 3,700 (11.57)              | 11,032 (8.74) | 524 (1.64)                  | 1,541 (1.22)   | 2,352 (7.36)                 | 7,022 (5.56) | 1,260 (3.94)                      | 3,660 (2.90)   | 478 (1.50)                  | 1,388 (1.10) |
| OR (95% CI)*                                        | 1.37 (1.31-1.42)           |               | 1.35 (1.22-1.49)            |                | 1.35 (1.29-1.42)             |              | 1.37 (1.29-1.47)                  |                | 1.37 (1.23-1.52)            |              |
| P value                                             | p<0.01                     |               | p<0.01                      |                | p<0.01                       |              | p<0.01                            |                | p<0.01                      |              |
| aOR (95% CI)**                                      | 1.42 (1.36-1.49)           |               | 1.30 (1.18-1.45)            |                | 1.35 (1.28-1.42)             |              | 1.36 (1.27-1.46)                  |                | 1.31 (1.18-1.46)            |              |
| P value                                             | p<0.01                     |               | p<0.01                      |                | p<0.01                       |              | p<0.01                            |                | p<0.01                      |              |
|                                                     | Vascular dementia          |               | All cardiometabolic disease |                | Type 2 diabetes mellitus     |              | Hypertension                      |                | All autoimmune conditions   |              |
|                                                     | Exposed                    | Unexposed     | Exposed                     | Unexposed      | Exposed                      | Unexposed    | Exposed                           | Unexposed      | Exposed                     | Unexposed    |
| Total number of patients, n                         | 31,968                     | 126,278       | 31,968                      | 126,278        | 31,968                       | 126,278      | 31,968                            | 126,278        | 31,968                      | 126,278      |
| Number of patients with condition at baseline, n(%) | 89 (0.28)                  | 204 (0.16)    | 7,488 (23.42)               | 26,602 (21.07) | 2,126 (6.65)                 | 6,773 (5.36) | 6,597 (20.64)                     | 23,995 (19.00) | 2,833 (8.86)                | 8,948 (7.09) |
| OR (95% CI)*                                        | 1.73 (1.34-2.21)           |               | 1.15 (1.11-1.18)            |                | 1.26 (1.20-1.32)             |              | 1.11 (1.08-1.14)                  |                | 1.28 (1.22-1.33)            |              |
| P value                                             | p<0.01                     |               | p<0.01                      |                | p<0.01                       |              | p<0.01                            |                | p<0.01                      |              |
| aOR (95% CI)**                                      | 1.64 (1.27-2.12)           |               | 1.14 (1.10-1.19)            |                | 1.15 (1.09-1.22)             |              | 1.10 (1.06-1.15)                  |                | 1.26 (1.21-1.32)            |              |
| P value                                             | p<0.01                     |               | p<0.01                      |                | p<0.01                       |              | p<0.01                            |                | p<0.01                      |              |
|                                                     | Type 1 diabetes mellitus   |               | Rheumatoid arthritis        |                | Systemic lupus erythematosus |              | Sjogren                           |                | Vitiligo                    |              |
|                                                     | Exposed                    | Unexposed     | Exposed                     | Unexposed      | Exposed                      | Unexposed    | Exposed                           | Unexposed      | Exposed                     | Unexposed    |
| Total number of patients, n                         | 31,968                     | 126,278       | 31,968                      | 126,278        | 31,968                       | 126,278      | 31,968                            | 126,278        | 31,968                      | 126,278      |



|                                                     |                    |              |                                     |                |                                   |                |                  |               |                               |              |
|-----------------------------------------------------|--------------------|--------------|-------------------------------------|----------------|-----------------------------------|----------------|------------------|---------------|-------------------------------|--------------|
| Number of patients with condition at baseline, n(%) | 304 (0.95)         | 836 (0.66)   | 403 (1.26)                          | 1,044 (0.83)   | 104 (0.33)                        | 189 (0.15)     | 58 (0.18)        | 119 (0.09)    | 130 (0.41)                    | 355 (0.28)   |
| OR (95% CI)*                                        | 1.44 (1.26-1.64)   |              | 1.53 (1.36-1.72)                    |                | 2.18 (1.71-2.77)                  |                | 1.93 (1.41-2.64) |               | 1.45 (1.18-1.77)              |              |
| P value                                             | p<0.01             |              | p<0.01                              |                | p<0.01                            |                | p<0.01           |               | p<0.01                        |              |
| aOR (95% CI)**                                      | 1.40 (1.23-1.61)   |              | 1.48 (1.32-1.67)                    |                | 2.14 (1.68-2.73)                  |                | 1.79 (1.30-2.47) |               | 1.31 (1.07-1.61)              |              |
| P value                                             | p<0.01             |              | p<0.01                              |                | p<0.01                            |                | p<0.01           |               | p=0.01                        |              |
|                                                     | <b>Psoriasis</b>   |              | <b>Pernicious anaemia</b>           |                | <b>Inflammatory bowel disease</b> |                | <b>Coeliac</b>   |               | <b>Autoimmune thyroiditis</b> |              |
|                                                     | Exposed            | Unexposed    | Exposed                             | Unexposed      | Exposed                           | Unexposed      | Exposed          | Unexposed     | Exposed                       | Unexposed    |
| Total number of patients, n                         | 31,968             | 126,278      | 31,968                              | 126,278        | 31,968                            | 126,278        | 31,968           | 126,278       | 31,968                        | 126,278      |
| Number of patients with condition at baseline, n(%) | 1,362 (4.26)       | 4,558 (3.61) | 134 (0.42)                          | 457 (0.36)     | 317 (0.99)                        | 1,031 (0.82)   | 119 (0.37)       | 336 (0.27)    | 104 (0.33)                    | 408 (0.32)   |
| OR (95% CI)*                                        | 1.19 (1.12-1.26)   |              | 1.16 (0.96-1.41)                    |                | 1.22 (1.07-1.38)                  |                | 1.40 (1.14-1.73) |               | 1.01 (0.81-1.25)              |              |
| P value                                             | p<0.01             |              | p=0.13                              |                | p<0.01                            |                | p<0.01           |               | p=0.95                        |              |
| aOR (95% CI)**                                      | 1.19 (1.12-1.27)   |              | 1.10 (0.90-1.34)                    |                | 1.21 (1.07-1.38)                  |                | 1.41 (1.14-1.74) |               | 0.98 (0.79-1.22)              |              |
| P value                                             | p<0.01             |              | p=0.35                              |                | p<0.01                            |                | p<0.01           |               | p=0.84                        |              |
|                                                     | <b>Scleroderma</b> |              | <b>All mental health conditions</b> |                | <b>Depression</b>                 |                | <b>Anxiety</b>   |               | <b>Severe mental illness</b>  |              |
|                                                     | Exposed            | Unexposed    | Exposed                             | Unexposed      | Exposed                           | Unexposed      | Exposed          | Unexposed     | Exposed                       | Unexposed    |
| Total number of patients, n                         | 31,968             | 126,278      | 31,968                              | 126,278        | 31,968                            | 126,278        | 31,968           | 126,278       | 31,968                        | 126,278      |
| Number of patients with condition at baseline, n(%) | 23 (0.07)          | 59 (0.05)    | 10,036 (31.39)                      | 27,197 (21.54) | 7,187 (22.48)                     | 19,341 (15.32) | 4,894 (15.31)    | 12,153 (9.62) | 703 (2.20)                    | 1,651 (1.31) |
| OR (95% CI)*                                        | 1.54 (0.95-2.49)   |              | 1.67 (1.62-1.71)                    |                | 1.60 (1.56-1.65)                  |                | 1.70 (1.64-1.76) |               | 1.70 (1.55-1.86)              |              |
| P value                                             | p=0.08             |              | p<0.01                              |                | p<0.01                            |                | p<0.01           |               | p<0.01                        |              |



1  
2  
3  
4  
5  
6  
7  
8  
9  
10  
11  
12  
13  
14  
15  
16  
17  
18  
19  
20  
21  
22  
23  
24  
25  
26  
27  
28  
29  
30  
31  
32  
33  
34  
35  
36  
37  
38  
39  
40  
41  
42  
43  
44  
45  
46

|                |                  |                  |                  |                  |                  |
|----------------|------------------|------------------|------------------|------------------|------------------|
| aOR (95% CI)** | 1.45 (0.89-2.37) | 1.71 (1.66-1.76) | 1.63 (1.58-1.68) | 1.71 (1.65-1.78) | 1.68 (1.53-1.84) |
| P value        | p=0.14           | p<0.01           | p<0.01           | p<0.01           | p<0.01           |

\* Unadjusted odds ratio, OR: odds ratio, aOR: adjusted odds ratio  
 \*\* Adjusted odds ratio: adjusted for age, sex, body mass index, Townsend deprivation index, smoking status and ethnicity at baseline

For peer review only

**eTable 4. Risk of subsequent development of chronic diseases in the incident only sensitivity analysis**

|                            | All cardiovascular disease |                  | Heart failure               |                  | Ischaemic heart disease  |                  | Stroke/transient-ischaemic attack |                  | Peripheral vascular disease |                  |
|----------------------------|----------------------------|------------------|-----------------------------|------------------|--------------------------|------------------|-----------------------------------|------------------|-----------------------------|------------------|
|                            | Exposed                    | Unexposed        | Exposed                     | Unexposed        | Exposed                  | Unexposed        | Exposed                           | Unexposed        | Exposed                     | Unexposed        |
| Number of patients         | 28,268                     | 115,246          | 31,444                      | 124,737          | 29,616                   | 119,256          | 30,708                            | 122,618          | 31,490                      | 124,890          |
| Number of outcomes, n(%)   | 1,473 (5.21)               | 5,196 (4.51)     | 409 (1.30)                  | 1,455 (1.17)     | 715 (2.41)               | 2,303 (1.93)     | 745 (2.43)                        | 2,604 (2.12)     | 272 (0.86)                  | 784 (0.63)       |
| Person-years               | 171,643                    | 668,935          | 193,503                     | 734,319          | 180,791                  | 698,131          | 188,372                           | 718,635          | 193,366                     | 734,953          |
| IR (per 1000 person-years) | 8.58                       | 7.77             | 2.11                        | 1.98             | 3.95                     | 3.3              | 3.95                              | 3.62             | 1.41                        | 1.07             |
| Follow-up, Median(IQR)     | 5.37 (2.41-8.99)           | 4.99 (2.19-8.68) | 5.46 (2.47-9.12)            | 5.09 (2.24-8.80) | 5.41 (2.43-9.04)         | 5.05 (2.22-8.75) | 5.44 (2.47-9.08)                  | 5.06 (2.23-8.76) | 5.45 (2.46-9.11)            | 5.08 (2.24-8.80) |
| HR (95% CI)*               | 1.10 (1.04-1.17)           |                  | 1.06 (0.95-1.19)            |                  | 1.20 (1.10-1.30)         |                  | 1.09 (1.00-1.18)                  |                  | 1.32 (1.15-1.51)            |                  |
| P value                    | p<0.01                     |                  | p=0.27                      |                  | p<0.01                   |                  | p=0.04                            |                  | p<0.01                      |                  |
| aHR (95% CI)**             | 1.17 (1.10-1.24)           |                  | 1.07 (0.96-1.20)            |                  | 1.23 (1.13-1.34)         |                  | 1.12 (1.03-1.22)                  |                  | 1.32 (1.15-1.52)            |                  |
| P value                    | p<0.01                     |                  | p=0.23                      |                  | p<0.01                   |                  | p<0.01                            |                  | p<0.01                      |                  |
|                            | Vascular dementia          |                  | All cardiometabolic disease |                  | Type 2 diabetes mellitus |                  | Hypertension                      |                  | All autoimmune conditions   |                  |
|                            | Exposed                    | Unexposed        | Exposed                     | Unexposed        | Exposed                  | Unexposed        | Exposed                           | Unexposed        | Exposed                     | Unexposed        |
| Number of patients         | 31,879                     | 126,074          | 24,480                      | 99,676           | 29,842                   | 119,505          | 25,371                            | 102,283          | 29,135                      | 117,330          |
| Number of outcomes, n(%)   | 148 (0.46)                 | 474 (0.38)       | 2,310 (9.44)                | 8,363 (8.39)     | 1,355 (4.54)             | 3,913 (3.27)     | 1,881 (7.41)                      | 7,192 (7.03)     | 964 (3.31)                  | 2,700 (2.30)     |
| Person-years               | 196,449                    | 743,531          | 142,524                     | 554,252          | 179,645                  | 693,204          | 148,885                           | 572,392          | 152,881                     | 627,091          |
| IR (per 1000 person-years) | 0.75                       | 0.64             | 16.21                       | 15.09            | 7.54                     | 5.64             | 12.63                             | 12.56            | 6.31                        | 4.31             |
| Follow-up, Median(IQR)     | 5.47 (2.48-9.13)           | 5.10 (2.25-8.81) | 5.02 (2.21-8.68)            | 4.68 (2.02-8.32) | 5.27 (2.35-8.96)         | 4.98 (2.18-8.68) | 5.09 (2.25-8.72)                  | 4.73 (2.04-8.38) | 4.24 (1.75-7.95)            | 4.41 (1.85-8.05) |
| HR (95% CI)*               | 1.17 (0.98-1.41)           |                  | 1.07 (1.03-1.12)            |                  | 1.34 (1.26-1.42)         |                  | 1.01 (0.96-1.06)                  |                  | 1.47 (1.37-1.59)            |                  |

|                            | <b>Type 1 diabetes mellitus</b> |                  | <b>Rheumatoid arthritis</b> |                  | <b>Systemic lupus erythematosus</b> |                  | <b>Sjogren</b>   |                  | <b>Vitiligo</b>               |                  |
|----------------------------|---------------------------------|------------------|-----------------------------|------------------|-------------------------------------|------------------|------------------|------------------|-------------------------------|------------------|
|                            | Exposed                         | Unexposed        | Exposed                     | Unexposed        | Exposed                             | Unexposed        | Exposed          | Unexposed        | Exposed                       | Unexposed        |
| P value                    | p=0.09                          |                  | p<0.01                      |                  | p<0.01                              |                  | p=0.83           |                  | p<0.01                        |                  |
| aHR (95% CI)**             | 1.20 (1.00-1.45)                |                  | 1.07 (1.02-1.12)            |                  | 1.30 (1.22-1.38)                    |                  | 1.01 (0.96-1.06) |                  | 1.48 (1.37-1.59)              |                  |
| P value                    | p=0.06                          |                  | p<0.01                      |                  | p<0.01                              |                  | p=0.77           |                  | p<0.01                        |                  |
| Number of patients         | 31,664                          | 125,442          | 31,565                      | 125,234          | 31,864                              | 126,089          | 31,910           | 126,159          | 31,838                        | 125,923          |
| Number of outcomes, n(%)   | 63 (0.20)                       | 120 (0.10)       | 146 (0.46)                  | 409 (0.33)       | 45 (0.14)                           | 72 (0.06)        | 44 (0.14)        | 63 (0.05)        | 63 (0.20)                     | 138 (0.11)       |
| Person-years               | 194,829                         | 739,746          | 193,993                     | 737,315          | 196,108                             | 743,639          | 196,422          | 744,022          | 195,815                       | 742,249          |
| IR (per 1000 person-years) | 0.32                            | 0.16             | 0.75                        | 0.55             | 0.23                                | 0.1              | 0.22             | 0.08             | 0.32                          | 0.19             |
| Follow-up, Median(IQR)     | 5.46 (2.47-9.13)                | 5.10 (2.25-8.82) | 5.45 (2.47-9.11)            | 5.09 (2.25-8.80) | 5.46 (2.47-9.13)                    | 5.10 (2.25-8.81) | 5.47 (2.47-9.13) | 5.10 (2.25-8.81) | 5.46 (2.47-9.12)              | 5.10 (2.25-8.81) |
| HR (95% CI)*               | 2.01 (1.48-2.72)                |                  | 1.35 (1.12-1.64)            |                  | 2.37 (1.64-3.45)                    |                  | 2.64 (1.79-3.87) |                  | 1.74 (1.29-2.34)              |                  |
| P value                    | p<0.01                          |                  | p<0.01                      |                  | p<0.01                              |                  | p<0.01           |                  | p<0.01                        |                  |
| aHR (95% CI)**             | 1.84 (1.35-2.51)                |                  | 1.37 (1.13-1.66)            |                  | 2.45 (1.68-3.57)                    |                  | 2.57 (1.74-3.80) |                  | 1.59 (1.18-2.16)              |                  |
| P value                    | p<0.01                          |                  | p<0.01                      |                  | p<0.01                              |                  | p<0.01           |                  | p<0.01                        |                  |
|                            | <b>Psoriasis</b>                |                  | <b>Pernicious anaemia</b>   |                  | <b>Inflammatory bowel disease</b>   |                  | <b>Coeliac</b>   |                  | <b>Autoimmune thyroiditis</b> |                  |
|                            | Exposed                         | Unexposed        | Exposed                     | Unexposed        | Exposed                             | Unexposed        | Exposed          | Unexposed        | Exposed                       | Unexposed        |
| Number of patients         | 30,606                          | 121,720          | 31,834                      | 125,821          | 31,651                              | 125,247          | 31,849           | 125,942          | 31,864                        | 125,870          |
| Number of outcomes, n(%)   | 443 (1.45)                      | 1,294 (1.06)     | 89 (0.28)                   | 243 (0.19)       | 105 (0.33)                          | 321 (0.26)       | 56 (0.18)        | 173 (0.14)       | 50 (0.16)                     | 144 (0.11)       |
| Person-years               | 186,612                         | 712,529          | 195,847                     | 741,633          | 194,586                             | 737,712          | 195,911          | 742,372          | 196,034                       | 741,787          |
| IR (per 1000 person-years) | 2.37                            | 1.82             | 0.45                        | 0.33             | 0.54                                | 0.44             | 0.29             | 0.23             | 0.26                          | 0.19             |
| Follow-up, Median(IQR)     | 5.40 (2.43-9.03)                | 5.04 (2.22-8.75) | 5.46 (2.48-9.12)            | 5.10 (2.25-8.81) | 5.45 (2.47-9.12)                    | 5.10 (2.25-8.81) | 5.46 (2.47-9.12) | 5.10 (2.25-8.81) | 5.46 (2.47-9.12)              | 5.10 (2.25-8.81) |

| HR (95% CI)*               | 1.31 (1.17-1.46) |                  | 1.39 (1.09-1.77)             |                  | 1.24 (1.00-1.55) |                  | 1.23 (0.91-1.66) |                  | 1.32 (0.95-1.82)      |                  |
|----------------------------|------------------|------------------|------------------------------|------------------|------------------|------------------|------------------|------------------|-----------------------|------------------|
| P value                    | p<0.01           |                  | p<0.01                       |                  | p=0.05           |                  | p=0.18           |                  | p=0.09                |                  |
| aHR (95% CI)**             | 1.31 (1.18-1.46) |                  | 1.41 (1.10-1.80)             |                  | 1.23 (0.98-1.53) |                  | 1.26 (0.93-1.70) |                  | 1.29 (0.93-1.78)      |                  |
| P value                    | p<0.01           |                  | p<0.01                       |                  | p=0.07           |                  | p=0.14           |                  | p=0.12                |                  |
|                            | Scleroderma      |                  | All mental health conditions |                  | Depression       |                  | Anxiety          |                  | Severe mental illness |                  |
|                            | Exposed          | Unexposed        | Exposed                      | Unexposed        | Exposed          | Unexposed        | Exposed          | Unexposed        | Exposed               | Unexposed        |
| Number of patients         | 31,945           | 126,219          | 21,932                       | 99,081           | 24,781           | 106,937          | 27,074           | 114,125          | 31,265                | 124,627          |
| Number of outcomes, n(%)   | 5 (0.02)         | 16 (0.01)        | 2,450 (11.17)                | 7,513 (7.58)     | 1,955 (7.89)     | 5,746 (5.37)     | 1,586 (5.86)     | 4,127 (3.62)     | 202 (0.65)            | 418 (0.34)       |
| Person-years               | 196,725          | 744,579          | 124,610                      | 551,747          | 144,563          | 605,666          | 158,613          | 653,590          | 192,266               | 734,597          |
| IR (per 1000 person-years) | 0.03             | 0.02             | 19.66                        | 13.62            | 13.52            | 9.49             | 10               | 6.31             | 1.05                  | 0.57             |
| Follow-up, Median(IQR)     | 5.47 (2.48-9.13) | 5.10 (2.25-8.82) | 4.83 (2.13-8.47)             | 4.69 (2.03-8.35) | 5.00 (2.22-8.70) | 4.80 (2.09-8.49) | 5.08 (2.27-8.73) | 4.90 (2.14-8.57) | 5.45 (2.47-9.12)      | 5.10 (2.25-8.81) |
| HR (95% CI)*               | 1.19 (0.43-3.24) |                  | 1.45 (1.38-1.51)             |                  | 1.43 (1.36-1.51) |                  | 1.58 (1.50-1.68) |                  | 1.85 (1.57-2.19)      |                  |
| P value                    | p=0.74           |                  | p<0.01                       |                  | p<0.01           |                  | p<0.01           |                  | p<0.01                |                  |
| aHR (95% CI)**             | 1.20 (0.43-3.32) |                  | 1.47 (1.40-1.53)             |                  | 1.45 (1.37-1.52) |                  | 1.58 (1.49-1.68) |                  | 1.86 (1.57-2.20)      |                  |
| P value                    | p=0.72           |                  | p<0.01                       |                  | p<0.01           |                  | p<0.01           |                  | p<0.01                |                  |

\* Unadjusted hazard ratio, IR: incidence rate, HR: hazard ratio, aHR: adjusted hazard ratio

\*\* Adjusted hazard ratio: adjusted for age, sex, body mass index, Townsend deprivation index, smoking status and ethnicity at baseline

**eTable 5. Baseline characteristics of the periodontitis cohort**

|                               | Periodontitis only cohort |                    |
|-------------------------------|---------------------------|--------------------|
|                               | Exposed<br>n (%)          | Unexposed<br>n (%) |
| All                           | (n=3,384)                 | (n=12,893)         |
| Sex (Male)                    | 1560 (46.10)              | 5927 (45.97)       |
| Age at index date             | 48.10 (17.43)             | 47.81 (17.25)      |
| Age categories                |                           |                    |
| 18 - 24 years                 | 330 (9.75)                | 1269 (9.84)        |
| 25 - 34 years                 | 502 (14.83)               | 1952 (15.14)       |
| 35 - 44 years                 | 650 (19.21)               | 2515 (19.51)       |
| 45 - 54 years                 | 701 (20.72)               | 2646 (20.52)       |
| 55 - 64 years                 | 560 (16.55)               | 2148 (16.66)       |
| 65 - 74 years                 | 369 (10.90)               | 1368 (10.61)       |
| 75 & overs                    | 272 (8.04)                | 995 (7.72)         |
| BMI                           | 26.49 (5.62)              | 26.43 (5.43)       |
| BMI Categories                |                           |                    |
| Under/Normal weight (18.5-25) | 1203 (35.55)              | 4539 (35.21)       |
| Overweight (25-30)            | 905 (26.74)               | 3475 (26.95)       |
| Obese (>30)                   | 571 (16.87)               | 2122 (16.46)       |
| Missing                       | 705 (20.83)               | 2757 (21.38)       |
| Townsend quintiles            |                           |                    |
| 1 (Least deprived)            | 584 (17.26)               | 2128 (16.51)       |
| 2                             | 580 (17.14)               | 2051 (15.91)       |
| 3                             | 614 (18.14)               | 2187 (16.96)       |
| 4                             | 644 (19.03)               | 2135 (16.56)       |
| 5 (Most deprived)             | 520 (15.37)               | 1616 (12.53)       |
| Missing                       | 442 (13.06)               | 2776 (21.53)       |
| Smoking categories            |                           |                    |
| Non-smoker                    | 1359 (40.16)              | 5221 (40.49)       |
| Smoker                        | 1124 (33.22)              | 4274 (33.15)       |
| Ex-smoker                     | 585 (17.29)               | 2224 (17.25)       |
| Missing                       | 316 (9.34)                | 1174 (9.11)        |
| Ethnicity                     |                           |                    |
| Caucasian                     | 1271 (37.56)              | 4906 (38.05)       |
| Mixed race                    | 21 (0.62)                 | 67 (0.52)          |
| Other                         | 5 (0.15)                  | 40 (0.31)          |
| Black                         | 45 (1.33)                 | 132 (1.02)         |
| South Asian                   | 82 (2.42)                 | 170 (1.32)         |
| Missing                       | 1960 (57.92)              | 7578 (58.78)       |

**eTable 6. Risk of chronic diseases at baseline in the periodontitis only sensitivity analysis cohort**

|                                                     | All cardiovascular disease |            | Heart failure               |               | Ischaemic heart disease      |            | Stroke/transient-ischaemic attack |               | Peripheral vascular disease |            |
|-----------------------------------------------------|----------------------------|------------|-----------------------------|---------------|------------------------------|------------|-----------------------------------|---------------|-----------------------------|------------|
|                                                     | Exposed                    | Unexposed  | Exposed                     | Unexposed     | Exposed                      | Unexposed  | Exposed                           | Unexposed     | Exposed                     | Unexposed  |
| Total number of patients                            | 3,384                      | 12,893     | 3,384                       | 12,893        | 3,384                        | 12,893     | 3,384                             | 12,893        | 3,384                       | 12,893     |
| Number of patients with condition at baseline, n(%) | 355 (10.49)                | 971 (7.53) | 53 (1.57)                   | 120 (0.93)    | 244 (7.21)                   | 607 (4.71) | 112 (3.31)                        | 297 (2.30)    | 59 (1.74)                   | 141 (1.09) |
| OR (95% CI)*                                        | 1.44 (1.27-1.64)           |            | 1.69 (1.22-2.35)            |               | 1.57 (1.35-1.83)             |            | 1.45 (1.16-1.81)                  |               | 1.60 (1.18-2.18)            |            |
| P value                                             | p<0.01                     |            | p<0.01                      |               | p<0.01                       |            | p<0.01                            |               | p<0.01                      |            |
| aOR (95% CI)**                                      | 1.50 (1.30-1.74)           |            | 1.71 (1.22-2.41)            |               | 1.64 (1.38-1.94)             |            | 1.43 (1.14-1.81)                  |               | 1.57 (1.15-2.15)            |            |
| P value                                             | p<0.01                     |            | p<0.01                      |               | p<0.01                       |            | p<0.01                            |               | p<0.01                      |            |
|                                                     | Vascular dementia          |            | All cardiometabolic disease |               | Type 2 diabetes mellitus     |            | Hypertension                      |               | All autoimmune conditions   |            |
|                                                     | Exposed                    | Unexposed  | Exposed                     | Unexposed     | Exposed                      | Unexposed  | Exposed                           | Unexposed     | Exposed                     | Unexposed  |
| Total number of patients, n                         | 3,384                      | 12,893     | 3,384                       | 12,893        | 3,384                        | 12,893     | 3,384                             | 12,893        | 3,384                       | 12,893     |
| Number of patients with condition at baseline, n(%) | 4 (0.12)                   | 18 (0.14)  | 659 (19.47)                 | 2,221 (17.23) | 172 (5.08)                   | 529 (4.10) | 590 (17.43)                       | 2,006 (15.56) | 286 (8.45)                  | 836 (6.48) |
| OR (95% CI)*                                        | 0.85 (0.29-2.50)           |            | 1.16 (1.06-1.28)            |               | 1.25 (1.05-1.49)             |            | 1.15 (1.04-1.27)                  |               | 1.33 (1.16-1.53)            |            |
| P value                                             | p=0.76                     |            | p<0.01                      |               | p=0.01                       |            | p<0.01                            |               | p<0.01                      |            |
| aOR (95% CI)**                                      | 0.71 (0.23-2.19)           |            | 1.19 (1.06-1.34)            |               | 1.25 (1.03-1.51)             |            | 1.17 (1.04-1.32)                  |               | 1.32 (1.15-1.52)            |            |
| P value                                             | p=0.55                     |            | p<0.01                      |               | p=0.02                       |            | p<0.01                            |               | p<0.01                      |            |
|                                                     | Type 1 diabetes mellitus   |            | Rheumatoid arthritis        |               | Systemic lupus erythematosus |            | Sjogren                           |               | Vitiligo                    |            |
|                                                     | Exposed                    | Unexposed  | Exposed                     | Unexposed     | Exposed                      | Unexposed  | Exposed                           | Unexposed     | Exposed                     | Unexposed  |
| Total number of patients, n                         | 3,384                      | 12,893     | 3,384                       | 12,893        | 3,384                        | 12,893     | 3,384                             | 12,893        | 3,384                       | 12,893     |

1  
2  
3  
4  
5  
6  
7  
8  
9  
10  
11  
12  
13  
14  
15  
16  
17  
18  
19  
20  
21  
22  
23  
24  
25  
26  
27  
28  
29  
30  
31  
32  
33  
34  
35  
36  
37  
38  
39  
40  
41  
42  
43  
44  
45  
46

|                                                     |                    |            |                                     |               |                                   |               |                  |              |                               |            |
|-----------------------------------------------------|--------------------|------------|-------------------------------------|---------------|-----------------------------------|---------------|------------------|--------------|-------------------------------|------------|
| Number of patients with condition at baseline, n(%) | 43 (1.27)          | 79 (0.61)  | 37 (1.09)                           | 96 (0.74)     | 10 (0.30)                         | 20 (0.16)     | 4 (0.12)         | 9 (0.07)     | 13 (0.38)                     | 25 (0.19)  |
| OR (95% CI)*                                        | 2.09 (1.44-3.03)   |            | 1.47 (1.01-2.16)                    |               | 1.91 (0.89-4.08)                  |               | 1.69 (0.52-5.50) |              | 1.98 (1.01-3.88)              |            |
| P value                                             | p<0.01             |            | p=0.05                              |               | p=0.10                            |               | p=0.38           |              | p=0.05                        |            |
| aOR (95% CI)**                                      | 2.07 (1.42-3.02)   |            | 1.44 (0.98-2.13)                    |               | 1.82 (0.84-3.93)                  |               | 1.45 (0.44-4.79) |              | 1.99 (1.01-3.92)              |            |
| P value                                             | p<0.01             |            | p=0.06                              |               | p=0.13                            |               | p=0.54           |              | p=0.05                        |            |
|                                                     | <b>Psoriasis</b>   |            | <b>Pernicious anaemia</b>           |               | <b>Inflammatory bowel disease</b> |               | <b>Coeliac</b>   |              | <b>Autoimmune thyroiditis</b> |            |
|                                                     | Exposed            | Unexposed  | Exposed                             | Unexposed     | Exposed                           | Unexposed     | Exposed          | Unexposed    | Exposed                       | Unexposed  |
| Total number of patients, n                         | 3,384              | 12,893     | 3,384                               | 12,893        | 3,384                             | 12,893        | 3,384            | 12,893       | 3,384                         | 12,893     |
| Number of patients with condition at baseline, n(%) | 125 (3.69)         | 437 (3.39) | 14 (0.41)                           | 31 (0.24)     | 36 (1.06)                         | 94 (0.73)     | 8 (0.24)         | 32 (0.25)    | 9 (0.27)                      | 42 (0.33)  |
| OR (95% CI)*                                        | 1.09 (0.89-1.34)   |            | 1.72 (0.92-3.24)                    |               | 1.46 (1.00-2.15)                  |               | 0.95 (0.44-2.07) |              | 0.82 (0.40-1.68)              |            |
| P value                                             | p=0.39             |            | p=0.09                              |               | p=0.05                            |               | p=0.90           |              | p=0.58                        |            |
| aOR (95% CI)**                                      | 1.09 (0.89-1.34)   |            | 1.54 (0.81-2.92)                    |               | 1.45 (0.98-2.14)                  |               | 0.98 (0.45-2.15) |              | 0.81 (0.39-1.67)              |            |
| P value                                             | p=0.40             |            | p=0.19                              |               | p=0.06                            |               | p=0.97           |              | p=0.57                        |            |
|                                                     | <b>Scleroderma</b> |            | <b>All mental health conditions</b> |               | <b>Depression</b>                 |               | <b>Anxiety</b>   |              | <b>Severe mental illness</b>  |            |
|                                                     | Exposed            | Unexposed  | Exposed                             | Unexposed     | Exposed                           | Unexposed     | Exposed          | Unexposed    | Exposed                       | Unexposed  |
| Total number of patients, n                         | 3,384              | 12,893     | 3,384                               | 12,893        | 3,384                             | 12,893        | 3,384            | 12,893       | 3,384                         | 12,893     |
| Number of patients with condition at baseline, n(%) | 7 (0.21)           | 7 (0.05)   | 1,021 (30.17)                       | 2,745 (21.29) | 704 (20.80)                       | 1,942 (15.06) | 531 (15.69)      | 1,252 (9.71) | 70 (2.07)                     | 149 (1.16) |
| OR (95% CI)*                                        | 3.82 (1.34-10.89)  |            | 1.60 (1.47-1.74)                    |               | 1.48 (1.35-1.63)                  |               | 1.73 (1.55-1.93) |              | 1.81 (1.36-2.41)              |            |
| P value                                             | p=0.01             |            | p<0.01                              |               | p<0.01                            |               | p<0.01           |              | p<0.01                        |            |

|                |                   |                  |                  |                  |                  |
|----------------|-------------------|------------------|------------------|------------------|------------------|
| aOR (95% CI)** | 4.18 (1.45-12.10) | 1.63 (1.49-1.78) | 1.50 (1.36-1.66) | 1.74 (1.55-1.94) | 1.83 (1.37-2.44) |
| P value        | p<0.01            | p<0.01           | p<0.01           | p<0.01           | p<0.01           |

\* Unadjusted odds ratio, OR: odds ratio, aOR: adjusted odds ratio

\*\* Adjusted odds ratio: adjusted for age, sex, body mass index, Townsend deprivation index, smoking status and ethnicity at baseline

For peer review only



**eTable 7. Risk of subsequent development of chronic diseases in the periodontitis only sensitivity analysis**

|                            | All cardiovascular disease |                   | Heart failure               |                   | Ischaemic heart disease  |                   | Stroke/transient-ischaemic attack |                   | Peripheral vascular disease |                   |
|----------------------------|----------------------------|-------------------|-----------------------------|-------------------|--------------------------|-------------------|-----------------------------------|-------------------|-----------------------------|-------------------|
|                            | Exposed                    | Unexposed         | Exposed                     | Unexposed         | Exposed                  | Unexposed         | Exposed                           | Unexposed         | Exposed                     | Unexposed         |
| Number of patients         | 3,029                      | 11,922            | 3,331                       | 12,773            | 3,140                    | 12,286            | 3,272                             | 12,596            | 3,325                       | 12,752            |
| Number of outcomes, n(%)   | 221 (7.30)                 | 646 (5.42)        | 57 (1.71)                   | 156 (1.22)        | 106 (3.38)               | 301 (2.45)        | 97 (2.96)                         | 311 (2.47)        | 47 (1.41)                   | 101 (0.79)        |
| Person-years               | 21,705                     | 80,954            | 24,737                      | 88,720            | 22,881                   | 84,397            | 24,127                            | 86,844            | 24,625                      | 88,567            |
| IR (per 1000 person-years) | 10.18                      | 7.98              | 2.3                         | 1.76              | 4.63                     | 3.57              | 4.02                              | 3.58              | 1.91                        | 1.14              |
| Follow-up, Median(IQR)     | 5.92 (2.63-10.83)          | 5.60 (2.30-10.26) | 6.31 (2.81-11.32)           | 5.83 (2.42-10.46) | 6.19 (2.75-11.03)        | 5.70 (2.36-10.36) | 6.23 (2.81-11.15)                 | 5.73 (2.39-10.37) | 6.29 (2.77-11.23)           | 5.83 (2.42-10.48) |
| HR (95% CI)*               | 1.27 (1.09-1.48)           |                   | 1.30 (0.96-1.77)            |                   | 1.30 (1.04-1.62)         |                   | 1.12 (0.89-1.41)                  |                   | 1.67 (1.18-2.36)            |                   |
| P value                    | p<0.01                     |                   | p=0.09                      |                   | p=0.02                   |                   | p=0.33                            |                   | p<0.01                      |                   |
| aHR (95% CI)**             | 1.31 (1.12-1.52)           |                   | 1.27 (0.94-1.73)            |                   | 1.35 (1.08-1.69)         |                   | 1.12 (0.89-1.41)                  |                   | 1.67 (1.18-2.38)            |                   |
| P value                    | p<0.01                     |                   | p=0.12                      |                   | p<0.01                   |                   | p=0.34                            |                   | p<0.01                      |                   |
|                            | Vascular dementia          |                   | All cardiometabolic disease |                   | Type 2 diabetes mellitus |                   | Hypertension                      |                   | All autoimmune conditions   |                   |
|                            | Exposed                    | Unexposed         | Exposed                     | Unexposed         | Exposed                  | Unexposed         | Exposed                           | Unexposed         | Exposed                     | Unexposed         |
| Number of patients         | 3,380                      | 12,875            | 2,725                       | 10,672            | 3,212                    | 12,364            | 2,794                             | 10,887            | 3,098                       | 12,057            |
| Number of outcomes, n(%)   | 20 (0.59)                  | 55 (0.43)         | 303 (11.12)                 | 1,133 (10.62)     | 173 (5.39)               | 449 (3.63)        | 247 (8.84)                        | 982 (9.02)        | 104 (3.36)                  | 308 (2.55)        |
| Person-years               | 25,137                     | 89,654            | 18,750                      | 68,456            | 23,111                   | 84,508            | 19,504                            | 70,497            | 19,592                      | 74,615            |
| IR (per 1000 person-years) | 0.8                        | 0.61              | 16.16                       | 16.55             | 7.49                     | 5.31              | 12.66                             | 13.93             | 5.31                        | 4.13              |
| Follow-up, Median(IQR)     | 6.31 (2.84-11.32)          | 5.86 (2.44-10.51) | 5.54 (2.38-10.38)           | 5.16 (2.12-9.61)  | 6.00 (2.65-10.90)        | 5.66 (2.34-10.32) | 5.67 (2.45-10.54)                 | 5.23 (2.14-9.72)  | 4.86 (1.93-9.57)            | 4.89 (1.89-9.45)  |
| HR (95% CI)*               | 1.27 (0.76-2.12)           |                   | 0.97 (0.86-1.10)            |                   | 1.40 (1.18-1.67)         |                   | 0.90 (0.79-1.04)                  |                   | 1.25 (1.00-1.56)            |                   |

|                            | Type 1 diabetes mellitus |                   | Rheumatoid arthritis |                   | Systemic lupus erythematosus |                   | Sjogren           |                   | Vitiligo               |                   |
|----------------------------|--------------------------|-------------------|----------------------|-------------------|------------------------------|-------------------|-------------------|-------------------|------------------------|-------------------|
|                            | Exposed                  | Unexposed         | Exposed              | Unexposed         | Exposed                      | Unexposed         | Exposed           | Unexposed         | Exposed                | Unexposed         |
| P value                    | p=0.36                   |                   | p=0.65               |                   | p<0.01                       |                   | p=0.16            |                   | p=0.05                 |                   |
| aHR (95% CI)**             | 1.23 (0.73-2.07)         |                   | 0.96 (0.85-1.10)     |                   | 1.43 (1.20-1.71)             |                   | 0.91 (0.79-1.05)  |                   | 1.21 (0.96-1.51)       |                   |
| P value                    | p=0.44                   |                   | p=0.57               |                   | p<0.01                       |                   | p=0.20            |                   | p=0.10                 |                   |
| Number of patients         | 3,341                    | 12,814            | 3,347                | 12,797            | 3,374                        | 12,873            | 3,380             | 12,884            | 3,371                  | 12,868            |
| Number of outcomes, n(%)   | 8 (0.24)                 | 17 (0.13)         | 13 (0.39)            | 51 (0.40)         | 6 (0.18)                     | 10 (0.08)         | 6 (0.18)          | 3 (0.02)          | 8 (0.24)               | 9 (0.07)          |
| Person-years               | 24,868                   | 89,212            | 24,897               | 88,889            | 25,097                       | 89,628            | 25,152            | 89,766            | 25,066                 | 89,569            |
| IR (per 1000 person-years) | 0.32                     | 0.19              | 0.52                 | 0.57              | 0.24                         | 0.11              | 0.24              | 0.03              | 0.32                   | 0.1               |
| Follow-up, Median(IQR)     | 6.31 (2.81-11.32)        | 5.86 (2.44-10.51) | 6.31 (2.81-11.32)    | 5.83 (2.42-10.48) | 6.31 (2.84-11.32)            | 5.86 (2.44-10.51) | 6.31 (2.84-11.32) | 5.86 (2.44-10.51) | 6.31 (2.84-11.32)      | 5.85 (2.44-10.51) |
| HR (95% CI)*               | 1.71 (0.74-3.97)         |                   | 0.90 (0.49-1.66)     |                   | 2.13 (0.77-5.86)             |                   | 7.02 (1.76-28.09) |                   | 3.13 (1.21-8.13)       |                   |
| P value                    | p=0.21                   |                   | p=0.74               |                   | p=0.14                       |                   | p<0.01            |                   | p=0.02                 |                   |
| aHR (95% CI)**             | 1.62 (0.70-3.76)         |                   | 0.96 (0.52-1.77)     |                   | 2.15 (0.77-6.00)             |                   | 6.67 (1.66-26.86) |                   | 2.90 (1.11-7.61)       |                   |
| P value                    | p=0.26                   |                   | p=0.90               |                   | p=0.14                       |                   | p<0.01            |                   | p=0.03                 |                   |
|                            | Psoriasis                |                   | Pernicious anaemia   |                   | Inflammatory bowel disease   |                   | Coeliac           |                   | Autoimmune thyroiditis |                   |
|                            | Exposed                  | Unexposed         | Exposed              | Unexposed         | Exposed                      | Unexposed         | Exposed           | Unexposed         | Exposed                | Unexposed         |
| Number of patients         | 3,259                    | 12,456            | 3,370                | 12,862            | 3,348                        | 12,799            | 3,376             | 12,861            | 3,375                  | 12,851            |
| Number of outcomes, n(%)   | 49 (1.50)                | 165 (1.32)        | 13 (0.39)            | 25 (0.19)         | 13 (0.39)                    | 34 (0.27)         | 5 (0.15)          | 20 (0.16)         | 1 (0.03)               | 12 (0.09)         |
| Person-years               | 23,982                   | 85,868            | 25,033               | 89,510            | 24,901                       | 89,000            | 25,106            | 89,487            | 25,127                 | 89,498            |
| IR (per 1000 person-years) | 2.04                     | 1.92              | 0.52                 | 0.28              | 0.52                         | 0.38              | 0.2               | 0.22              | 0.04                   | 0.13              |
| Follow-up, Median(IQR)     | 6.25 (2.77-11.10)        | 5.76 (2.39-10.37) | 6.31 (2.84-11.25)    | 5.84 (2.44-10.50) | 6.31 (2.81-11.32)            | 5.85 (2.43-10.50) | 6.31 (2.82-11.32) | 5.85 (2.44-10.50) | 6.31 (2.84-11.32)      | 5.86 (2.44-10.51) |
| HR (95% CI)*               | 1.06 (0.77-1.46)         |                   | 1.85 (0.95-3.62)     |                   | 1.35 (0.71-2.57)             |                   | 0.90 (0.34-2.39)  |                   | 0.30 (0.04-2.29)       |                   |

1  
2  
3  
4  
5  
6  
7  
8  
9  
10  
11  
12  
13  
14  
15  
16  
17  
18  
19  
20  
21  
22  
23  
24  
25  
26  
27  
28  
29  
30  
31  
32  
33  
34  
35  
36  
37  
38  
39  
40  
41  
42  
43  
44  
45  
46

| P value                    | p=0.71            |                   | p=0.07                       |                  | p=0.35            |                   | p=0.83            |                   | p=0.24                |                   |
|----------------------------|-------------------|-------------------|------------------------------|------------------|-------------------|-------------------|-------------------|-------------------|-----------------------|-------------------|
| aHR (95% CI)**             | 1.05 (0.76-1.44)  |                   | 1.89 (0.96-3.74)             |                  | 1.35 (0.71-2.57)  |                   | 0.85 (0.32-2.28)  |                   | 0.29 (0.04-2.23)      |                   |
| P value                    | p=0.78            |                   | p=0.07                       |                  | p=0.36            |                   | p=0.75            |                   | p=0.23                |                   |
|                            | Scleroderma       |                   | All mental health conditions |                  | Depression        |                   | Anxiety           |                   | Severe mental illness |                   |
|                            | Exposed           | Unexposed         | Exposed                      | Unexposed        | Exposed           | Unexposed         | Exposed           | Unexposed         | Exposed               | Unexposed         |
| Number of patients         | 3,377             | 12,886            | 2,363                        | 10,148           | 2,680             | 10,951            | 2,853             | 11,641            | 3,314                 | 12,744            |
| Number of outcomes, n(%)   | 2 (0.06)          | 3 (0.02)          | 287 (12.15)                  | 875 (8.62)       | 224 (8.36)        | 671 (6.13)        | 189 (6.62)        | 521 (4.48)        | 15 (0.45)             | 46 (0.36)         |
| Person-years               | 25,152            | 89,739            | 16,121                       | 65,906           | 18,839            | 72,978            | 19,995            | 77,498            | 24,744                | 88,828            |
| IR (per 1000 person-years) | 0.08              | 0.03              | 17.8                         | 13.28            | 11.89             | 9.19              | 9.45              | 6.72              | 0.61                  | 0.52              |
| Follow-up, Median(IQR)     | 6.31 (2.84-11.32) | 5.86 (2.44-10.51) | 5.59 (2.33-10.37)            | 5.24 (2.09-9.85) | 5.76 (2.54-10.52) | 5.47 (2.21-10.09) | 5.77 (2.54-10.63) | 5.50 (2.24-10.04) | 6.34 (2.86-11.32)     | 5.86 (2.44-10.51) |
| HR (95% CI)*               | 2.40 (0.40-14.36) |                   | 1.35 (1.18-1.54)             |                  | 1.30 (1.12-1.52)  |                   | 1.41 (1.19-1.66)  |                   | 1.18 (0.66-2.12)      |                   |
| P value                    | p=0.34            |                   | p<0.01                       |                  | p<0.01            |                   | p<0.01            |                   | p=0.57                |                   |
| aHR (95% CI)**             | 2.26 (0.37-13.70) |                   | 1.33 (1.16-1.52)             |                  | 1.29 (1.11-1.50)  |                   | 1.37 (1.16-1.62)  |                   | 1.24 (0.69-2.23)      |                   |
| P value                    | p=0.37            |                   | p<0.01                       |                  | p<0.01            |                   | p<0.01            |                   | p=0.47                |                   |

\* Unadjusted hazard ratio, IR: incidence rate, HR: hazard ratio, aHR: adjusted hazard ratio  
 \*\* Adjusted hazard ratio: adjusted for age, sex, body mass index, Townsend deprivation index, smoking status and ethnicity at baseline

**STROBE Statement—Checklist of items that should be included in reports of *cohort studies***

|                           | <b>Item No</b> | <b>Recommendation</b>                                                                                                           | <b>Reporting Location</b> |
|---------------------------|----------------|---------------------------------------------------------------------------------------------------------------------------------|---------------------------|
| <b>Title and abstract</b> | 1              | (a) Indicate the study's design with a commonly used term in the title or the abstract                                          | Title and abstract        |
|                           |                | (b) Provide in the abstract an informative and balanced summary of what was done and what was found                             | Abstract                  |
| <b>Introduction</b>       |                |                                                                                                                                 |                           |
| Background/rationale      | 2              | Explain the scientific background and rationale for the investigation being reported                                            | Introduction              |
| Objectives                | 3              | State specific objectives, including any prespecified hypotheses                                                                | Introduction              |
| <b>Methods</b>            |                |                                                                                                                                 |                           |
| Study design              | 4              | Present key elements of study design early in the paper                                                                         | Methods                   |
| Setting                   | 5              | Describe the setting, locations, and relevant dates, including periods of recruitment, exposure, follow-up, and data collection | Methods                   |

1  
2  
3  
4  
5  
6  
7  
8  
9  
10  
11  
12  
13  
14  
15  
16  
17  
18  
19  
20  
21  
22  
23  
24  
25  
26  
27  
28  
29  
30  
31  
32  
33  
34  
35  
36  
37  
38  
39  
40  
41  
42  
43  
44  
45  
46

|                              |    |                                                                                                                                                                                      |                    |
|------------------------------|----|--------------------------------------------------------------------------------------------------------------------------------------------------------------------------------------|--------------------|
| Participants                 | 6  | (a) Give the eligibility criteria, and the sources and methods of selection of participants.<br>Describe methods of follow-up                                                        | Methods            |
|                              |    | (b) For matched studies, give matching criteria and number of exposed and unexposed                                                                                                  | Methods            |
|                              |    |                                                                                                                                                                                      | Results: Table 1   |
| Variables                    | 7  | Clearly define all outcomes, exposures, predictors, potential confounders, and effect modifiers. Give diagnostic criteria, if applicable                                             | Methods            |
| Data sources/<br>measurement | 8* | For each variable of interest, give sources of data and details of methods of assessment (measurement). Describe comparability of assessment methods if there is more than one group | Methods            |
| Bias                         | 9  | Describe any efforts to address potential sources of bias                                                                                                                            | Methods/discussion |
| Study size                   | 10 | Explain how the study size was arrived at                                                                                                                                            | Methods            |

|                                                                                                          |                        |     |                                                                                                                                                                                                   |                     |
|----------------------------------------------------------------------------------------------------------|------------------------|-----|---------------------------------------------------------------------------------------------------------------------------------------------------------------------------------------------------|---------------------|
| 1<br>2<br>3<br>4<br>5<br>6<br>7<br>8                                                                     | Quantitative variables | 11  | Explain how quantitative variables were handled in the analyses. If applicable, describe which groupings were chosen and why                                                                      | Methods             |
| 9                                                                                                        | <hr/>                  |     |                                                                                                                                                                                                   |                     |
| 10<br>11<br>12<br>13<br>14<br>15<br>16<br>17<br>18<br>19<br>20<br>21<br>22<br>23<br>24<br>25<br>26<br>27 | Statistical methods    | 12  | (a) Describe all statistical methods, including those used to control for confounding                                                                                                             | Methods             |
| 28                                                                                                       |                        |     | (b) Describe any methods used to examine subgroups and interactions                                                                                                                               | Methods             |
| 29                                                                                                       |                        |     | (c) Explain how missing data were addressed                                                                                                                                                       | Methods             |
| 30                                                                                                       |                        |     | (d) If applicable, explain how loss to follow-up was addressed                                                                                                                                    | Methods             |
| 31<br>32<br>33<br>34<br>35<br>36<br>37<br>38<br>39<br>40<br>41<br>42                                     |                        |     | (e) Describe any sensitivity analyses                                                                                                                                                             | Methods             |
| 43                                                                                                       | <hr/>                  |     |                                                                                                                                                                                                   |                     |
| 44                                                                                                       | <b>Results</b>         |     |                                                                                                                                                                                                   |                     |
| 45<br>46                                                                                                 | Participants           | 13* | (a) Report numbers of individuals at each stage of study—eg numbers potentially eligible, examined for eligibility, confirmed eligible, included in the study, completing follow-up, and analysed | Methods and results |

1  
2  
3  
4  
5  
6  
7  
8  
9  
10  
11  
12  
13  
14  
15  
16  
17  
18  
19  
20  
21  
22  
23  
24  
25  
26  
27  
28  
29  
30  
31  
32  
33  
34  
35  
36  
37  
38  
39  
40  
41  
42  
43  
44  
45  
46

|                  |     |                                                                                                                                                                                                              |                       |
|------------------|-----|--------------------------------------------------------------------------------------------------------------------------------------------------------------------------------------------------------------|-----------------------|
|                  |     | (b) Give reasons for non-participation at each stage                                                                                                                                                         | N/A                   |
|                  |     | (c) Consider use of a flow diagram                                                                                                                                                                           | N/A                   |
| Descriptive data | 14* | (a) Give characteristics of study participants (eg demographic, clinical, social) and information on exposures and potential confounders                                                                     | Results               |
|                  |     | (b) Indicate number of participants with missing data for each variable of interest                                                                                                                          | Table 1               |
|                  |     | (c) Summarise follow-up time (eg, average and total amount)                                                                                                                                                  | Table 1               |
| Outcome data     | 15* | Report numbers of outcome events or summary measures over time                                                                                                                                               | Results and Table 2/3 |
| Main results     | 16  | (a) Give unadjusted estimates and, if applicable, confounder-adjusted estimates and their precision (eg, 95% confidence interval). Make clear which confounders were adjusted for and why they were included | Results and Table 2/3 |
|                  |     | (b) Report category boundaries when continuous variables were categorized                                                                                                                                    | Results and Table 2/3 |

|                          |    |                                                                                                                                                                            |                                            |
|--------------------------|----|----------------------------------------------------------------------------------------------------------------------------------------------------------------------------|--------------------------------------------|
|                          |    | (c) If relevant, consider translating estimates of relative risk into absolute risk for a meaningful time period                                                           | N/A                                        |
| Other analyses           | 17 | Report other analyses done—eg analyses of subgroups and interactions, and sensitivity analyses                                                                             | Mentioned in results and throughout tables |
| <b>Discussion</b>        |    |                                                                                                                                                                            |                                            |
| Key results              | 18 | Summarise key results with reference to study objectives                                                                                                                   | Discussion                                 |
| Limitations              | 19 | Discuss limitations of the study, taking into account sources of potential bias or imprecision. Discuss both direction and magnitude of any potential bias                 | Discussion                                 |
| Interpretation           | 20 | Give a cautious overall interpretation of results considering objectives, limitations, multiplicity of analyses, results from similar studies, and other relevant evidence | Discussion                                 |
| Generalisability         | 21 | Discuss the generalisability (external validity) of the study results                                                                                                      | Discussion                                 |
| <b>Other information</b> |    |                                                                                                                                                                            |                                            |



1  
2  
3  
4  
5  
6  
7  
8  
9  
10  
11  
12  
13  
14  
15  
16  
17  
18  
19  
20  
21  
22  
23  
24  
25  
26  
27  
28  
29  
30  
31  
32  
33  
34  
35  
36  
37  
38  
39  
40  
41  
42  
43  
44  
45  
46

---

Funding

22

Give the source of funding and the role of the funders for the present study and, if applicable, for the original study on which the present article is based

Highlighted in funding and acknowledgements section

---

For peer review only

# BMJ Open

## The burden of chronic diseases associated with periodontal diseases: A retrospective cohort study using UK primary care data

|                                 |                                                                                                                                                                                                                                                                                                                                                                                                                                                                                                                                                                                                                                                                                                                                                                                                                                                                                                                                                                                                                                                                                        |
|---------------------------------|----------------------------------------------------------------------------------------------------------------------------------------------------------------------------------------------------------------------------------------------------------------------------------------------------------------------------------------------------------------------------------------------------------------------------------------------------------------------------------------------------------------------------------------------------------------------------------------------------------------------------------------------------------------------------------------------------------------------------------------------------------------------------------------------------------------------------------------------------------------------------------------------------------------------------------------------------------------------------------------------------------------------------------------------------------------------------------------|
| Journal:                        | <i>BMJ Open</i>                                                                                                                                                                                                                                                                                                                                                                                                                                                                                                                                                                                                                                                                                                                                                                                                                                                                                                                                                                                                                                                                        |
| Manuscript ID                   | bmjopen-2020-048296.R1                                                                                                                                                                                                                                                                                                                                                                                                                                                                                                                                                                                                                                                                                                                                                                                                                                                                                                                                                                                                                                                                 |
| Article Type:                   | Original research                                                                                                                                                                                                                                                                                                                                                                                                                                                                                                                                                                                                                                                                                                                                                                                                                                                                                                                                                                                                                                                                      |
| Date Submitted by the Author:   | 18-Aug-2021                                                                                                                                                                                                                                                                                                                                                                                                                                                                                                                                                                                                                                                                                                                                                                                                                                                                                                                                                                                                                                                                            |
| Complete List of Authors:       | Zemedikun, Dawit; University of Birmingham, Institute of Applied Health Research<br>Chandan, Joht; University of Birmingham College of Medical and Dental Sciences, Institute of Applied Health Research<br>Raindi, Devan; Birmingham Dental Hospital<br>Rajgor, Amarkumar; Newcastle University School of Clinical Medical Sciences<br>Gokhale, Krishna; University of Birmingham<br>Thomas, Tom; University of Oxford, Kennedy Institute of Rheumatology<br>Falahee, Marie; University of Birmingham College of Medical and Dental Sciences, Institute of Inflammation and Ageing<br>DE PABLO, Paola; University of Birmingham College of Medical and Dental Sciences, Rheumatology, College of Medical & Dental Sciences<br>Lord, Janet; University of Birmingham College of Medical and Dental Sciences, MRC Centre for Immune Regulation<br>Raza, Karim; University of Birmingham College of Medical and Dental Sciences, College of Medical and Dental Sciences<br>Nirantharakumar, Krishnarajah; University of Birmingham College of Medical and Dental Sciences, Public Health |
| <b>Primary Subject Heading</b>: | Public health                                                                                                                                                                                                                                                                                                                                                                                                                                                                                                                                                                                                                                                                                                                                                                                                                                                                                                                                                                                                                                                                          |
| Secondary Subject Heading:      | Dentistry and oral medicine                                                                                                                                                                                                                                                                                                                                                                                                                                                                                                                                                                                                                                                                                                                                                                                                                                                                                                                                                                                                                                                            |
| Keywords:                       | EPIDEMIOLOGY, Health informatics < BIOTECHNOLOGY & BIOINFORMATICS, ORAL MEDICINE, PUBLIC HEALTH                                                                                                                                                                                                                                                                                                                                                                                                                                                                                                                                                                                                                                                                                                                                                                                                                                                                                                                                                                                        |
|                                 |                                                                                                                                                                                                                                                                                                                                                                                                                                                                                                                                                                                                                                                                                                                                                                                                                                                                                                                                                                                                                                                                                        |

SCHOLARONE™  
Manuscripts



I, the Submitting Author has the right to grant and does grant on behalf of all authors of the Work (as defined in the below author licence), an exclusive licence and/or a non-exclusive licence for contributions from authors who are: i) UK Crown employees; ii) where BMJ has agreed a CC-BY licence shall apply, and/or iii) in accordance with the terms applicable for US Federal Government officers or employees acting as part of their official duties; on a worldwide, perpetual, irrevocable, royalty-free basis to BMJ Publishing Group Ltd ("BMJ") its licensees and where the relevant Journal is co-owned by BMJ to the co-owners of the Journal, to publish the Work in this journal and any other BMJ products and to exploit all rights, as set out in our [licence](#).

The Submitting Author accepts and understands that any supply made under these terms is made by BMJ to the Submitting Author unless you are acting as an employee on behalf of your employer or a postgraduate student of an affiliated institution which is paying any applicable article publishing charge ("APC") for Open Access articles. Where the Submitting Author wishes to make the Work available on an Open Access basis (and intends to pay the relevant APC), the terms of reuse of such Open Access shall be governed by a Creative Commons licence – details of these licences and which [Creative Commons](#) licence will apply to this Work are set out in our licence referred to above.

Other than as permitted in any relevant BMJ Author's Self Archiving Policies, I confirm this Work has not been accepted for publication elsewhere, is not being considered for publication elsewhere and does not duplicate material already published. I confirm all authors consent to publication of this Work and authorise the granting of this licence.

# The burden of chronic diseases associated with periodontal diseases: A retrospective cohort study using UK primary care data

**Running Title:** The association between chronic disease and periodontal diseases

**Author Names:**

Dawit T Zemedikun<sup>1\*</sup>, Joht Singh Chandan<sup>1,2\*</sup>, Devan Raindi<sup>3</sup>, Amarkumar Dhirajlal Rajgor<sup>4,5</sup>, Krishna Margadhmane Gokhale<sup>1</sup>, Tom Thomas<sup>6</sup>, Marie Falahee<sup>7</sup>, Paola De Pablo<sup>7</sup>, Janet M Lord<sup>7</sup>, Karim Raza<sup>7,8,9^</sup>, Krishnarajah Nirantharakumar<sup>1^</sup>

1 Institute of Applied Health Research, University of Birmingham, Birmingham, UK

2 Warwick Medical School, University of Warwick, Coventry, UK

3 Birmingham Dental Hospital, Birmingham, UK

4 The Newcastle Upon Tyne Hospitals NHS Foundation Trust, Newcastle, UK

5 Population Health Sciences, Newcastle University, Framlington Place, Newcastle upon Tyne, UK

6 Kennedy Institute of Rheumatology, University of Oxford, UK

7 Institute of Inflammation and Ageing, University of Birmingham, Birmingham, UK

8 Sandwell and West Birmingham NHS Trust, Birmingham UK

9 Research into Inflammatory Arthritis Centre Versus Arthritis and MRC- Versus Arthritis Centre for Musculoskeletal Ageing Research, University of Birmingham

\*Joint first author

^ Joint senior author

Corresponding author:

Dr Joht Singh Chandan

[Joht.chandan@nhs.net](mailto:Joht.chandan@nhs.net)

07535712715

1  
2  
3  
4  
5  
6  
7  
8  
9 **Word count:** 3884

10  
11 **Conflict of interest:** None  
12

13  
14 **Contribution statement:** DTZ, JSC, DR, TT, KN and KR conceived the idea for the study. DTZ,  
15 KMG and JSC conducted the statistical analysis. DTZ, JSC, DR, ADR were responsible for the  
16 initial draft of the report. KMG, TT, MF, PDP, JML, KR and KN contributed to subsequent  
17 drafts and all authors were involved in the final draft. KR and KN were responsible for  
18 supervision.  
19

20  
21 **Funding and acknowledgments:** This paper represents independent research part funded  
22 by the MRC Versus Arthritis Centre for Musculoskeletal Ageing Research. K Raza and JM  
23 Lord are supported by the NIHR Birmingham Biomedical Research Centre. The views  
24 expressed are those of the author(s) and not necessarily those of the NIHR or the  
25 Department of Health and Social Care. Professor Thomas Dietrich kindly also reviewed and  
26 commented on a finalised copy of the manuscript.  
27  
28

29  
30 **Data sharing:** The full data-set following ethics approval and statistical analysis code are  
31 available from author JSC ([joht.chandan@nhs.net](mailto:joht.chandan@nhs.net)).  
32

33  
34 **Patient and public involvement:** No patients were actively involved in setting the research  
35 question, outcome measures nor involved in the design of the study. Patients were not  
36 involved in interpretation or write up of the results, nor are there plans for the results to be  
37 disseminated to the patient community affected by this research.  
38

39  
40 **Ethics approval:** Anonymised data were used throughout the study provided by the data  
41 provider to the University of Birmingham. Studies using IMRD-UK database have had initial  
42 ethical approval from the NHS South-East Multicentre Research Ethics Committee, subject  
43 to prior independent scientific review. The Scientific Review Committee (IQVIA) approved  
44 the study protocol (SRC Reference Number: SRC20THIN036).  
45

46  
47 **Transparency statement:** The lead author (the manuscript's guarantor) affirms that this  
48 manuscript is an honest, accurate, and transparent account of the study being reported;  
49 that no important aspects of the study have been omitted; and that any discrepancies from  
50 the study as planned (and, if relevant, registered) have been explained.  
51  
52  
53  
54  
55  
56  
57  
58  
59  
60

## ABSTRACT

**Objectives:** To identify the association between periodontal diseases (gingivitis and periodontitis) and chronic diseases including cardiovascular disease, cardiometabolic disease, autoimmune disease, and mental ill health.

**Design:** Retrospective cohort.

**Setting:** IQVIA Medical Research Data-UK between 1<sup>st</sup> January 1995 and 1<sup>st</sup> January 2019.

**Participants:** 64,379 adult patients with a general practitioner recorded diagnosis of periodontal disease (exposed patients) were matched to 251,161 unexposed patients by age, sex, deprivation, and registration date.

**Main outcome measures:** Logistic regression models accounting for covariates of clinical importance were undertaken to estimate the adjusted odds ratio (aOR) of having chronic diseases at baseline in the exposed compared to the unexposed group. Incidence rates for each outcome of interest were then provided followed by the calculation of adjusted hazard ratios (aHR) using cox regression modelling to describe the risk of outcome development in each group.

**Results:** The average age at cohort entry was 45 years and the median follow-up was 3.4 years. At study entry, the exposed cohort had an increased likelihood of having a diagnosis of cardiovascular disease (aOR 1.43; 95% CI 1.38-1.48), cardiometabolic disease (aOR 1.16; 95% CI 1.13-1.19), autoimmune disease (aOR 1.33; 95% CI 1.28-1.37), and mental ill health (aOR 1.79; 95% CI 1.75-1.83) compared to the unexposed group. During follow-up of individuals without pre-existing outcomes of interest, the exposed group had an increased risk of developing cardiovascular disease (HR 1.18; 95% CI 1.13-1.23), cardiometabolic disease (HR 1.07; 95% CI 1.03-1.10), autoimmune disease (HR 1.33; 95% CI 1.26-1.40), and mental ill health (HR 1.37; 95% CI 1.33-1.42) compared to the unexposed group.

**Conclusions:** In this cohort, periodontal diseases appeared to be associated with an increased risk of developing cardiovascular, cardiometabolic, autoimmune diseases and mental ill health. Periodontal diseases are very common; therefore, an increased risk of other chronic diseases represent a substantial public health burden.

**Keywords:** chronic disease; epidemiology; gingivitis; oral health; periodontitis

**Strengths and limitations:**

- This is the largest epidemiological study exploring the health outcomes of periodontal disease using primary care records
- This was the first study to explore and quantify the association between mental ill health and periodontal diseases
- Periodontal coding was not validated prior to this study so there may be misclassification bias
- Outcomes of interest were adjusted for known covariates recorded in primary care

For peer review only

## INTRODUCTION

Poor oral health is extremely common and is frequently characterised by chronic inflammation.<sup>1</sup> Advanced stages manifest as periodontitis where there is irreversible damage to local bone and tissue.<sup>2</sup> Earlier stages include gingivitis, a reversible inflammation of the gingiva initiated by dental plaque.<sup>2</sup> This spectrum from gingivitis to periodontitis, is widely termed 'periodontal diseases'.<sup>2,3</sup> Although, the exact aetiological mechanisms have yet to be fully elucidated, the development of a dysbiotic microbial biofilm, overactivation of inflammatory pathways and genetic susceptibility are all implicated.<sup>2,4-6</sup>

Progressive periodontal disease leads to a reduction in quality of life (QoL) due to problems relating with mastication (due to tooth loss), aesthetics (due to gum recession) and verbal communication.<sup>2,7,8</sup> Periodontal disease also results in a systemic pro-inflammatory state which in itself is implicated in the aetiology of chronic diseases including cardiovascular disease (CVD), cardiometabolic disease (CMD), mental ill health (MIH) and autoimmune disease (AID), each of which are highly prevalent and potentially preventable causes of global morbidity and mortality.<sup>1,9-17</sup> Therefore, a high prevalence of periodontal disease could translate to a substantial burden of morbidity and associated mortality.

Epidemiological data have demonstrated associations between periodontitis and all-cause mortality in Western European males (aHR 1.57; 95% CI 1.04-2.36).<sup>18</sup> Although, this relationship could be explained through activation of a pro-inflammatory state, there is a lack of robust epidemiological evidence as many of these chronic diseases share similar pathogenic pathways, often mediated by lifestyle factors including smoking and socioeconomic status.<sup>2,19-22</sup>

The association between periodontal disease and CVD is one of the more commonly researched. In 2012, the American Heart Association highlighted that, despite the literature supporting an association between periodontitis and atherosclerotic disease independent of known confounders, due to methodological limitations of available observational studies they were not able to confirm a causal relationship.<sup>23</sup> Existing studies are limited by an inability to distinguish reverse causality or account for recall bias (case-control or cross sectional designs), absence of adequate confounder control, lack of generalisability to other



1  
2  
3 populations and heterogeneity in definitions of exposure and outcomes.<sup>23–25</sup> A 2019 joint  
4 workshop held between the European Federation of Periodontology (EFP) and World Heart  
5 Federation (WHF) confirmed robust evidence for positive associations between  
6  
7 periodontitis and cardiovascular/cerebrovascular disease including an increased risk of first  
8  
9 cardiac or cerebrovascular event in patients with severe periodontitis.<sup>26</sup>  
10  
11  
12

13 A recent review from the US Centre for Disease Control (CDC) assessed the relationships  
14 between periodontal disease and other chronic diseases suggested that after CVD, the next  
15 most frequent association with periodontal disease was with levels of type 2 diabetes  
16 mellitus (T2DM) control. Emerging randomised trials suggest that treatment of periodontal  
17 disease reduces Hba1c levels in patients with diabetes<sup>27–29</sup>.<sup>28</sup> However, there is limited  
18 evidence exploring the risk of T2DM subsequent to periodontal disease and further  
19 investigation is needed.<sup>30</sup> Existing evidence suggests an association with autoimmune  
20 diseases such as rheumatoid arthritis (RA) and Sjogren's syndrome (SS), however, this is yet  
21 to be validated in longitudinal cohort datasets accounting for important covariates.<sup>31–33</sup> Few  
22 studies have explored the association between periodontal disease and subsequent mental  
23 ill health though a bi-directional mechanism relating to inflammation, psychosocial effects  
24 and the impact of psychopharmacological therapies has been proposed.<sup>34,35</sup>  
25  
26  
27  
28  
29  
30  
31  
32  
33  
34  
35

36 It is important to strengthen understanding of the link between oral health and chronic  
37 diseases as cost-effective dental interventions are available that could be preventive,  
38 reducing the subsequent public health burden of disease.<sup>2</sup> Therefore, we have conducted  
39 the first retrospective cohort study using a large medical dataset to explore the association  
40 between poor oral health and a range of chronic diseases including CVD, CMD, MIH and  
41  
42  
43  
44  
45  
46  
47  
48  
49  
50  
51  
52  
53  
54  
55  
56  
57  
58  
59  
60  
AID.

## METHODS

### Study design and data source

This study is a population based, retrospective open cohort study utilising IQVIA Medical Research Data (IMRD-UK), previously known as The Health Improvement Network (THIN)

1  
2  
3 database. The study period was set between 1st January 1995 and 1st January 2019. An  
4 open cohort study allows patients to enter and exit the study at different time points, with  
5 each patient only contributing person years of follow-up from the time of cohort entry  
6 (index date) to the time they leave the cohort (exit date).  
7  
8  
9

10  
11 During this study period, the database consisted of pseudo-anonymised electronic medical  
12 records of more than 15 million patients derived from 787 general practices using the Vision  
13 software system. The database is representative of the UK population in terms of  
14 demographic structure and prevalence of key comorbidities.<sup>36</sup> Symptoms, examinations,  
15 and diagnoses in THIN are recorded using a hierarchical clinical coding system called Read  
16 codes.<sup>37</sup> To improve data quality and reduce under-recording of events, general practices  
17 were included 12 months following instalment of electronic practice records or from the  
18 practice's acceptable mortality recording date.<sup>38,39</sup> The acceptable mortality reporting date  
19 for each practice is when the practice publishes mortality rates similar to the expected rate  
20 for their population outlined by the Office for National Statistics (ONS).<sup>38</sup> A total of  
21 8,618,829 patients were eligible to contribute during the study period. The data extraction  
22 and cohort selection was facilitated using the data extraction for epidemiological research  
23 (DExtER) tool.<sup>40</sup> DExtER utilises an extract, transform and load mechanism to extract study  
24 specific data with demonstrated reliability and validity.<sup>40</sup>  
25  
26  
27  
28  
29  
30  
31  
32  
33  
34  
35  
36  
37  
38

## 39 **Exposure and outcome definition**

40  
41  
42 The purpose of this study was to compare exposed patients (those with a GP recorded code  
43 of a periodontal disease, defined as either gingivitis or periodontitis) to unexposed patients  
44 (those without such codes) and then calculate their risk of developing chronic diseases  
45 defined through Read codes. The chronic disease outcomes were categorised as: CVD (CVD  
46 composite measure; heart failure (HF), ischaemic heart disease (HF), stroke/transient-  
47 ischaemic attack (TIA), peripheral vascular disease (PVD)), and vascular dementia (VD)),  
48 CMD (CMD composite measure; type 2 diabetes mellitus (T2DM), and hypertension (HTN)),  
49 AID (AID composite measure; type 1 diabetes mellitus (T1DM), rheumatoid arthritis (RA),  
50 systemic lupus erythematosus (SLE), Sjogren's syndrome (SS), vitiligo, psoriasis, pernicious  
51 anaemia (PA), inflammatory bowel disease (IBD), coeliac disease (CD), autoimmune  
52  
53  
54  
55  
56  
57  
58  
59  
60

1  
2  
3 thyroiditis (AT), and scleroderma), and MIH (MIH composite; depression, anxiety and  
4 serious mental illness (SMI). In addition, this study examined the odds ratio of having any  
5 chronic disease at the point of cohort entry (baseline) between the exposed and unexposed  
6 groups.  
7  
8  
9

10  
11 Codes relating to exposure and outcomes were selected with the assistance of general  
12 practitioners, public health doctors and a periodontal specialist. Although, the IMRD-UK  
13 (previously named the THIN database) has been previously used to examine oral disorders  
14 such as temporomandibular joint disorders,<sup>41,42</sup> exposure code lists relating to gingivitis and  
15 periodontitis have never been previously validated. Outcome code lists included in this  
16 study have been used extensively in previously published work using the same database and  
17 many of the conditions included feature in the Quality Outcomes Framework.<sup>43-52</sup> Read  
18 code lists relating to exposure terms and outcomes are provided in appendix (eTable 1).  
19  
20  
21  
22  
23  
24  
25  
26

## 27 **Selection of unexposed group**

28  
29  
30  
31 Each exposed patient was matched with up to four unexposed control patients from the  
32 remaining sample of patients in the dataset, who had no previously documented code relating  
33 to exposure. Controls were taken from a pool from eligible patients registered at a general  
34 practice within the same country of the UK and were matched by age at index date (+/- one  
35 year), sex, Townsend deprivation index<sup>53</sup> and registration date (+/- 12 months). The  
36 Townsend score is a measure of material deprivation within a locality, incorporating  
37 information on unemployment, household overcrowding and car/home ownership;<sup>53</sup> a higher  
38 score indicates a greater level of socioeconomic deprivation.  
39  
40  
41  
42  
43  
44  
45  
46

## 47 **Follow-up period**

48  
49  
50  
51 The index date for those in the exposed group was the date of the first Read code relating to  
52 exposure or when they became eligible to enter the study for those with a previous history  
53 of exposure (prevalent cases). Patients aged 18 years or older were eligible for entry into  
54 the cohort, therefore those who had the exposure of interest at an earlier age would enter  
55 the study as a prevalent case. To mitigate immortality time bias,<sup>54</sup> the same index date was  
56  
57  
58  
59  
60

1  
2  
3 assigned to the corresponding unexposed patient. Immortality time bias refers to a period  
4 of follow up where death or the study outcome cannot occur. The follow-up period for each  
5 patient was from the index date until the exit date. Exit date was defined as the earliest of  
6 the following end dates: study end date, last date of data collection from a given general  
7 practice, date patient transferred from general practice, date of death or date the outcome  
8 of interest occurred.  
9  
10  
11  
12  
13  
14

## 15 **Statistical analysis**

16  
17  
18  
19 Categorical baseline data were described using proportions and continuous data described  
20 using means with standard deviations (sd). Missing data are highlighted in relevant baseline  
21 characteristic tables. Missing covariate data were treated as a separate missing category  
22 and included in the final analysis. Co-variables considered in our modelling were selected due  
23 to their independent relationship with the outcome of interest or to remove any residual  
24 confounding. These included: age, sex, body mass index (BMI), Townsend deprivation index  
25 (measured in quintiles), smoking status and ethnicity.  
26  
27  
28  
29  
30  
31  
32

33 To describe the prevalence of chronic disease at baseline, we used logistic regression to  
34 estimate unadjusted odds ratio (OR) and adjusted OR (aOR), following adjustment for key  
35 covariates (age categories, sex, body mass index categories, Townsend deprivation index,  
36 smoking status categories and ethnicity categories). To calculate an incidence rate ((IR) per  
37 1000 person-years) for each of the outcomes of interest, patients with pre-existing chronic  
38 disease were excluded to ensure the IR reflected outcomes which occurred following cohort  
39 entry. Cox regression accounting for person years of follow-up was then used to calculate a  
40 hazard ratio (HR) for each outcome of interest during the study period. Following  
41 adjustment for the co-variables, we calculated and presented an adjusted HR (aHR). ORs and  
42 HRs are presented with 95% confidence intervals with statistical significance set at  $p < 0.05$ .  
43  
44  
45  
46  
47  
48  
49  
50  
51

52 An initial sensitivity analysis was conducted, isolating incident only cases (where the  
53 exposure occurred during the study period) compared to their respective controls. The  
54 purpose of this analysis was to exclude patients who may have had the exposure recorded  
55 prior to their study eligibility or study start date, leading to an unaccounted period where  
56  
57  
58  
59  
60

1  
2  
3 time dependent confounding factors may not have been sufficiently recorded in the  
4 patient's medical records. Throughout this paper we use the term periodontal disease to  
5 reflect the continuum from gingivitis to periodontitis though we conducted a second  
6 sensitivity analysis to examine if the outcomes differed when only examining cases with  
7 recorded periodontitis and their respective controls (exclusion of patients with a record of  
8 gingivitis and their respective controls). Stata version 15.1 SE software (StataCorp 2017) was  
9 used to conduct all analyses.  
10  
11  
12  
13  
14  
15  
16

## 17 Patient and public involvement

18  
19  
20  
21 No patients were actively involved in setting the research question, outcome measures nor  
22 involved in the design of the study. Patients were not involved in interpretation or write up  
23 of the results, nor are there plans for the results to be disseminated to the patient  
24 community affected by this research.  
25  
26  
27  
28  
29  
30  
31  
32  
33  
34  
35  
36  
37

## 38 RESULTS

### 39 Study characteristics

40  
41  
42  
43  
44  
45  
46 Of the eligible patients during the study period, we identified 64,379 patients with a  
47 recorded history of a periodontal disease, of whom 60,995 had gingivitis and 3,384 had  
48 periodontitis, who were matched to 251,161 unexposed patients. The median follow-up  
49 was similar in the two groups (exposed: 3.3 years, and unexposed: 3.5 years). The mean age  
50 at cohort entry was 44 years and 43% of the cohort were male. Due to matching, smoking  
51 status (30% current smokers) and deprivation levels were similar between the groups.  
52  
53  
54  
55  
56  
57 Additionally, BMI and ethnicity (despite 56% missing data) profiles were similar between the  
58 groups. Further details can be seen in **Table 1**.  
59  
60

**Table 1: Baseline characteristics of the study population**

|                   | Primary cohort   |                    |
|-------------------|------------------|--------------------|
|                   | Exposed<br>n (%) | Unexposed<br>n (%) |
| All               | (n=64,379)       | (n=251,161)        |
| Sex (Male)        | 27699 (43.02)    | 107977 (42.99)     |
| Age at index date | 45.66 (19.12)    | 45.40 (18.97)      |
| Age categories    |                  |                    |
| 18 - 24 years     | 10680 (16.59)    | 42204 (16.80)      |
| 25 - 34 years     | 11266 (17.50)    | 44556 (17.74)      |
| 35 - 44 years     | 10895 (16.92)    | 42641 (16.98)      |
| 45 - 54 years     | 10186 (15.82)    | 39795 (15.84)      |
| 55 - 64 years     | 8917 (13.85)     | 34621 (13.78)      |
| 65 - 74 years     | 6900 (10.72)     | 26649 (10.61)      |

1  
2  
3  
4  
5  
6  
7  
8  
9  
10  
11  
12  
13  
14  
15  
16  
17  
18  
19  
20  
21  
22  
23  
24  
25  
26  
27  
28  
29  
30  
31  
32  
33  
34  
35  
36  
37  
38  
39  
40  
41  
42  
43  
44  
45  
46  
47  
48  
49  
50  
51  
52  
53  
54  
55  
56  
57  
58  
59  
60

|                               |               |                |
|-------------------------------|---------------|----------------|
| 75 & overs                    | 5535 (8.60)   | 20695 (8.24)   |
| BMI                           | 26.29 (5.64)  | 26.27 (5.51)   |
| BMI Categories                |               |                |
| Under/Normal weight (18.5-25) | 23743 (36.88) | 91020 (36.24)  |
| Overweight (25-30)            | 16044 (24.92) | 63782 (25.39)  |
| Obese (>30)                   | 10857 (16.86) | 40589 (16.16)  |
| Missing                       | 13735 (21.33) | 55770 (22.20)  |
| Townsend quintiles            |               |                |
| 1 (Least deprived)            | 11548 (17.94) | 42631 (16.97)  |
| 2                             | 10868 (16.88) | 38909 (15.49)  |
| 3                             | 12216 (18.98) | 43494 (17.32)  |
| 4                             | 12005 (18.65) | 41440 (16.50)  |
| 5 (Most deprived)             | 9610 (14.93)  | 30831 (12.28)  |
| Missing                       | 8132 (12.63)  | 53856 (21.44)  |
| Smoking categories            |               |                |
| Non-smoker                    | 29100 (45.20) | 114513 (45.59) |
| Smoker                        | 19279 (29.95) | 75155 (29.92)  |
| Ex-smoker                     | 11107 (17.25) | 42647 (16.98)  |
| Missing                       | 4893 (7.60)   | 18846 (7.50)   |
| Ethnicity                     |               |                |
| Caucasian                     | 24327 (37.79) | 96169 (38.29)  |
| Mixed race                    | 477 (0.74)    | 1860 (0.74)    |
| Other                         | 215 (0.33)    | 925 (0.37)     |
| Black                         | 937 (1.46)    | 2951 (1.17)    |
| South Asian                   | 2512 (3.90)   | 4340 (1.73)    |
| Missing                       | 35911 (55.78) | 144916 (57.70) |

## Chronic disease at cohort entry

At cohort entry there were 6,355 patients (9.9%) in the exposed group who had a diagnosis of CVD compared to 18,594 (7.4%) in the unexposed group. Following adjustment for co-variables this translated to an aOR of 1.43 (95% CI 1.38-1.48). When examining CMD, 12,321 patients (19.1%) in the exposed group had a diagnosis of CMD at cohort entry compared to 42,828 (17.1%) in the unexposed group. This translated into an aOR of 1.16 (95% CI 1.13-1.19), and the association with the presence of T2DM (aOR 1.23; 95% CI 1.18-1.28) was notable. With AID, 5,265 patients (8.2%) in the exposed group had a diagnosis of AID at cohort entry compared to 15,690 (6.3%) in the unexposed group equating to an aOR of 1.33 (95% CI 1.28-1.37). Lastly, MIH was seen to have the greatest odds ratio (aOR 1.79; 95% CI

1  
2  
3 1.75-1.83) with periodontal disease at cohort entry with 19,142 patients (29.7%) in the  
4 exposed group who had a diagnosis of AID at cohort entry compared to 48,998 (19.5%) in  
5 the unexposed group. Further results can be seen in **Table 2** and **Figure 1**.  
6  
7  
8  
9  
10  
11  
12  
13  
14  
15  
16  
17  
18  
19  
20  
21  
22  
23  
24  
25  
26  
27  
28  
29  
30  
31  
32  
33  
34  
35  
36  
37  
38  
39  
40  
41  
42  
43  
44  
45  
46  
47  
48  
49  
50  
51  
52  
53  
54  
55  
56  
57  
58  
59  
60

For peer review only



Table 2: Risk of chronic diseases at baseline in patients exposed and unexposed to periodontal diseases

|                                                     | All cardiovascular disease |               | Heart failure               |                | Ischaemic heart disease  |               | Stroke/transient-ischaemic attack |                | Peripheral vascular disease |               |
|-----------------------------------------------------|----------------------------|---------------|-----------------------------|----------------|--------------------------|---------------|-----------------------------------|----------------|-----------------------------|---------------|
|                                                     | Exposed                    | Unexposed     | Exposed                     | Unexposed      | Exposed                  | Unexposed     | Exposed                           | Unexposed      | Exposed                     | Unexposed     |
| Total number of patients                            | 64,379                     | 251,161       | 64,379                      | 251,161        | 64,379                   | 251,161       | 64,379                            | 251,161        | 64,379                      | 251,161       |
| Number of patients with condition at baseline, n(%) | 6,355 (9.87)               | 18,594 (7.40) | 977 (1.52)                  | 2,608 (1.04)   | 3,963 (6.16)             | 11,759 (4.68) | 2,161 (3.36)                      | 6,154 (2.45)   | 860 (1.34)                  | 2,345 (0.93)  |
| OR (95% CI)*                                        | 1.37 (1.33-1.41)           |               | 1.47 (1.36-1.58)            |                | 1.34 (1.29-1.39)         |               | 1.38 (1.32-1.45)                  |                | 1.44 (1.33-1.55)            |               |
| P value                                             | p<0.01                     |               | p<0.01                      |                | p<0.01                   |               | p<0.01                            |                | p<0.01                      |               |
| aOR (95% CI)**                                      | 1.43 (1.38-1.48)           |               | 1.43 (1.32-1.54)            |                | 1.34 (1.28-1.39)         |               | 1.36 (1.29-1.44)                  |                | 1.37 (1.26-1.49)            |               |
| P value                                             | p<0.01                     |               | p<0.01                      |                | p<0.01                   |               | p<0.01                            |                | p<0.01                      |               |
|                                                     | Vascular dementia          |               | All cardiometabolic disease |                | Type 2 diabetes mellitus |               | Hypertension                      |                | All autoimmune conditions   |               |
|                                                     | Exposed                    | Unexposed     | Exposed                     | Unexposed      | Exposed                  | Unexposed     | Exposed                           | Unexposed      | Exposed                     | Unexposed     |
| Total number of patients                            | 64,379                     | 251,161       | 64,379                      | 251,161        | 64,379                   | 251,161       | 64,379                            | 251,161        | 64,379                      | 251,161       |
| Number of patients with condition at baseline, n(%) | 146 (0.23)                 | 363 (0.14)    | 12,321 (19.14)              | 42,828 (17.05) | 3,432 (5.33)             | 10,342 (4.12) | 10,841 (16.84)                    | 38,649 (15.39) | 5,265 (8.18)                | 15,690 (6.25) |
| OR (95% CI)*                                        | 1.57 (1.30-1.90)           |               | 1.15 (1.13-1.18)            |                | 1.31 (1.26-1.36)         |               | 1.11 (1.09-1.14)                  |                | 1.34 (1.29-1.38)            |               |
| P value                                             | p<0.01                     |               | p<0.01                      |                | p<0.01                   |               | p<0.01                            |                | p<0.01                      |               |
| aOR (95% CI)**                                      | 1.47 (1.20-1.79)           |               | 1.16 (1.13-1.19)            |                | 1.23 (1.18-1.28)         |               | 1.11 (1.08-1.15)                  |                | 1.33 (1.28-1.37)            |               |
| P value                                             | p<0.01                     |               | p<0.01                      |                | p<0.01                   |               | p<0.01                            |                | p<0.01                      |               |

|                                                     | Type 1 diabetes mellitus |              | Rheumatoid arthritis         |              | Systemic lupus erythematosus |              | Sjogren          |            | Vitiligo               |            |
|-----------------------------------------------------|--------------------------|--------------|------------------------------|--------------|------------------------------|--------------|------------------|------------|------------------------|------------|
|                                                     | Exposed                  | Unexposed    | Exposed                      | Unexposed    | Exposed                      | Unexposed    | Exposed          | Unexposed  | Exposed                | Unexposed  |
| Total number of patients                            | 64,379                   | 251,161      | 64,379                       | 251,161      | 64,379                       | 251,161      | 64,379           | 251,161    | 64,379                 | 251,161    |
| Number of patients with condition at baseline, n(%) | 591 (0.92)               | 1,473 (0.59) | 656 (1.02)                   | 1,786 (0.71) | 164 (0.25)                   | 346 (0.14)   | 103 (0.16)       | 189 (0.08) | 239 (0.37)             | 629 (0.25) |
| OR (95% CI)*                                        | 1.57 (1.43-1.73)         |              | 1.44 (1.31-1.57)             |              | 1.85 (1.54-2.23)             |              | 2.13 (1.67-2.71) |            | 1.48 (1.28-1.72)       |            |
| P value                                             | p<0.01                   |              | p<0.01                       |              | p<0.01                       |              | p<0.01           |            | p<0.01                 |            |
| aOR (95% CI)**                                      | 1.55 (1.41-1.71)         |              | 1.39 (1.27-1.53)             |              | 1.79 (1.48-2.16)             |              | 1.99 (1.56-2.54) |            | 1.40 (1.20-1.62)       |            |
| P value                                             | p<0.01                   |              | p<0.01                       |              | p<0.01                       |              | p<0.01           |            | p<0.01                 |            |
|                                                     | Psoriasis                |              | Pernicious anaemia           |              | Inflammatory bowel disease   |              | Coeliac          |            | Autoimmune thyroiditis |            |
|                                                     | Exposed                  | Unexposed    | Exposed                      | Unexposed    | Exposed                      | Unexposed    | Exposed          | Unexposed  | Exposed                | Unexposed  |
| Total number of patients                            | 64,379                   | 251,161      | 64,379                       | 251,161      | 64,379                       | 251,161      | 64,379           | 251,161    | 64,379                 | 251,161    |
| Number of patients with condition at baseline, n(%) | 2,615 (4.06)             | 8,105 (3.23) | 231 (0.36)                   | 738 (0.29)   | 560 (0.87)                   | 1,767 (0.70) | 206 (0.32)       | 576 (0.23) | 209 (0.32)             | 721 (0.29) |
| OR (95% CI)*                                        | 1.27 (1.21-1.33)         |              | 1.22 (1.05-1.42)             |              | 1.24 (1.13-1.36)             |              | 1.40 (1.19-1.64) |            | 1.13 (0.97-1.32)       |            |
| P value                                             | p<0.01                   |              | p<0.01                       |              | p<0.01                       |              | p<0.01           |            | p=0.12                 |            |
| aOR (95% CI)**                                      | 1.27 (1.21-1.33)         |              | 1.16 (1.00-1.35)             |              | 1.24 (1.12-1.36)             |              | 1.40 (1.19-1.65) |            | 1.12 (0.96-1.31)       |            |
| P value                                             | p<0.01                   |              | p=0.05                       |              | p<0.01                       |              | p<0.01           |            | p=0.16                 |            |
|                                                     | Scleroderma              |              | All mental health conditions |              | Depression                   |              | Anxiety          |            | Severe mental illness  |            |
|                                                     | Exposed                  | Unexposed    | Exposed                      | Unexposed    | Exposed                      | Unexposed    | Exposed          | Unexposed  | Exposed                | Unexposed  |

1  
2  
3  
4  
5  
6  
7  
8  
9  
10  
11  
12  
13  
14  
15  
16  
17  
18  
19  
20  
21  
22  
23  
24  
25  
26  
27  
28  
29  
30  
31  
32  
33  
34  
35  
36  
37  
38  
39  
40  
41  
42  
43  
44  
45  
46

|                                                     |                  |           |                  |                |                  |                |                  |               |                  |              |
|-----------------------------------------------------|------------------|-----------|------------------|----------------|------------------|----------------|------------------|---------------|------------------|--------------|
| Total number of patients                            | 64,379           | 251,161   | 64,379           | 251,161        | 64,379           | 251,161        | 64,379           | 251,161       | 64,379           | 251,161      |
| Number of patients with condition at baseline, n(%) | 42 (0.07)        | 94 (0.04) | 19,142 (29.73)   | 48,998 (19.51) | 13,496 (20.96)   | 34,415 (13.70) | 9,623 (14.95)    | 22,093 (8.80) | 1,242 (1.93)     | 2,905 (1.16) |
| OR (95% CI)*                                        | 1.74 (1.21-2.51) |           | 1.75 (1.71-1.78) |                | 1.67 (1.63-1.71) |                | 1.82 (1.78-1.87) |               | 1.68 (1.57-1.80) |              |
| P value                                             | p<0.01           |           | p<0.01           |                | p<0.01           |                | p<0.01           |               | p<0.01           |              |
| aOR (95% CI)**                                      | 1.69 (1.17-2.44) |           | 1.79 (1.75-1.83) |                | 1.69 (1.65-1.73) |                | 1.83 (1.79-1.88) |               | 1.66 (1.55-1.77) |              |
| P value                                             | p<0.01           |           | p<0.01           |                | p<0.01           |                | p<0.01           |               | p<0.01           |              |

\* Unadjusted odds ratio, OR: odds ratio, aOR: adjusted odds ratio  
 \*\* Adjusted odds ratio: adjusted for age, sex, body mass index, Townsend deprivation index, smoking status and ethnicity at baseline

## The risk of developing subsequent chronic disease

During the study period there were 3,104 (5.4%) new diagnoses of CVD in the exposed cohort equating to an IR of 8.2 per 1000 person-years compared to 7.3 per 1000 person-years (10,439 (4.5%) new recorded diagnoses) in the unexposed cohort. This translated to an aHR of 1.18 (95% CI 1.13-1.23). When examining CMD, there were 5,005 (9.6%) new diagnoses of CMD in the exposed cohort equating to an IR of 15.5 per 1000 person-years compared to 14.6 per 1000 person-years (17,822 (8.6%) new recorded diagnoses) in the unexposed cohort. Ultimately this translated into an aHR of 1.07 (95% CI 1.03-1.10) where the risk was highest for the development of T2DM (aHR 1.26; 95% CI 1.21-1.32). When examining AID, there were 1,945 (3.3%) new diagnoses of AID in the exposed cohort equating to an IR of 5.8 per 1000 person-years compared to 4.3 per 1000 person-years (5,674 (2.4%) new recorded diagnoses) in the unexposed cohort. This translated into an aHR of 1.33 (95% CI 1.26-1.40). Finally, with MIH, there were 5,296 (11.7%) new diagnoses of MIH in the exposed cohort relating to an IR of 19.2 per 1000 person-years compared to 14.2 per 1000 person-years (16,758 (8.3%) new recorded diagnoses) in the unexposed cohort. This translated into an aHR of 1.37 (95% CI 1.33-1.42). Further details can be seen on **Table 3 and Figure 2.**

Table 3: Risk of subsequent development of chronic diseases in patients exposed and unexposed to periodontal diseases

|                            | All cardiovascular disease |                  | Heart failure               |                  | Ischaemic heart disease  |                  | Stroke/transient-ischaemic attack |                  | Peripheral vascular disease |                  |
|----------------------------|----------------------------|------------------|-----------------------------|------------------|--------------------------|------------------|-----------------------------------|------------------|-----------------------------|------------------|
|                            | Exposed                    | Unexposed        | Exposed                     | Unexposed        | Exposed                  | Unexposed        | Exposed                           | Unexposed        | Exposed                     | Unexposed        |
| Number of patients         | 58,024                     | 232,567          | 63,402                      | 248,553          | 60,416                   | 239,402          | 62,218                            | 245,007          | 63,519                      | 248,816          |
| Number of outcomes, n(%)   | 3,104 (5.35)               | 10,439 (4.49)    | 906 (1.43)                  | 2,913 (1.17)     | 1,535 (2.54)             | 4,821 (2.01)     | 1,524 (2.45)                      | 4,956 (2.02)     | 615 (0.97)                  | 1,716 (0.69)     |
| Person-years               | 379,982                    | 1,433,611        | 423,176                     | 1,560,448        | 398,431                  | 1,489,663        | 413,659                           | 1,531,088        | 422,593                     | 1,560,781        |
| IR (per 1000 person-years) | 8.17                       | 7.28             | 2.14                        | 1.87             | 3.85                     | 3.24             | 3.68                              | 3.24             | 1.46                        | 1.1              |
| Follow-up, Median(IQR)     | 5.49 (2.36-9.85)           | 5.00 (2.07-9.33) | 5.62 (2.45-10.10)           | 5.15 (2.14-9.51) | 5.52 (2.39-9.95)         | 5.08 (2.11-9.42) | 5.59 (2.44-10.04)                 | 5.11 (2.12-9.46) | 5.59 (2.43-10.05)           | 5.14 (2.14-9.50) |
| HR (95% CI)*               | 1.12 (1.07-1.16)           |                  | 1.14 (1.06-1.23)            |                  | 1.19 (1.12-1.26)         |                  | 1.13 (1.07-1.20)                  |                  | 1.32 (1.20-1.45)            |                  |
| P value                    | p<0.01                     |                  | p<0.01                      |                  | p<0.01                   |                  | p<0.01                            |                  | p<0.01                      |                  |
| aHR (95% CI)**             | 1.18 (1.13-1.23)           |                  | 1.15 (1.07-1.24)            |                  | 1.22 (1.16-1.30)         |                  | 1.16 (1.10-1.23)                  |                  | 1.32 (1.20-1.45)            |                  |
| P value                    | p<0.01                     |                  | p<0.01                      |                  | p<0.01                   |                  | p<0.01                            |                  | p<0.01                      |                  |
|                            | Vascular dementia          |                  | All cardiometabolic disease |                  | Type 2 diabetes mellitus |                  | Hypertension                      |                  | All autoimmune conditions   |                  |
|                            | Exposed                    | Unexposed        | Exposed                     | Unexposed        | Exposed                  | Unexposed        | Exposed                           | Unexposed        | Exposed                     | Unexposed        |
| Number of patients         | 64,233                     | 250,798          | 52,058                      | 208,333          | 60,947                   | 240,819          | 53,538                            | 212,512          | 59,114                      | 235,471          |
| Number of outcomes, n(%)   | 262 (0.41)                 | 849 (0.34)       | 5,005 (9.61)                | 17,822 (8.55)    | 2,654 (4.35)             | 7,762 (3.22)     | 4,146 (7.74)                      | 15,340 (7.22)    | 1,945 (3.29)                | 5,674 (2.41)     |
| Person-years               | 429,726                    | 1,578,418        | 323,472                     | 1,218,325        | 397,557                  | 1,486,326        | 335,761                           | 1,252,770        | 334,525                     | 1,325,645        |
| IR (per 1000 person-years) | 0.61                       | 0.54             | 15.47                       | 14.63            | 6.68                     | 5.22             | 12.35                             | 12.24            | 5.81                        | 4.28             |
| Follow-up, Median(IQR)     | 5.63 (2.46-10.12)          | 5.17 (2.15-9.51) | 5.10 (2.16-9.38)            | 4.61 (1.90-8.82) | 5.44 (2.34-9.83)         | 5.01 (2.08-9.34) | 5.16 (2.19-9.48)                  | 4.67 (1.92-8.89) | 4.34 (1.73-8.60)            | 4.34 (1.73-8.54) |

| HR (95% CI)*               | 1.12 (0.97-1.29)         |                  | 1.05 (1.02-1.09)     |                  | 1.27 (1.22-1.33)             |                  | 1.01 (0.97-1.04)  |                  | 1.34 (1.28-1.41)       |                  |
|----------------------------|--------------------------|------------------|----------------------|------------------|------------------------------|------------------|-------------------|------------------|------------------------|------------------|
| P value                    | p=0.11                   |                  | p<0.01               |                  | p<0.01                       |                  | p=0.73            |                  | p<0.01                 |                  |
| aHR (95% CI)**             | 1.12 (0.97-1.29)         |                  | 1.07 (1.03-1.10)     |                  | 1.26 (1.21-1.32)             |                  | 1.02 (0.98-1.05)  |                  | 1.33 (1.26-1.40)       |                  |
| P value                    | p=0.12                   |                  | p<0.01               |                  | p<0.01                       |                  | p=0.33            |                  | p<0.01                 |                  |
|                            | Type 1 diabetes mellitus |                  | Rheumatoid arthritis |                  | Systemic lupus erythematosus |                  | Sjogren           |                  | Vitiligo               |                  |
|                            | Exposed                  | Unexposed        | Exposed              | Unexposed        | Exposed                      | Unexposed        | Exposed           | Unexposed        | Exposed                | Unexposed        |
| Number of patients         | 63,788                   | 249,688          | 63,723               | 249,375          | 64,215                       | 250,815          | 64,276            | 250,972          | 64,140                 | 250,532          |
| Number of outcomes, n(%)   | 144 (0.23)               | 283 (0.11)       | 298 (0.47)           | 819 (0.33)       | 75 (0.12)                    | 143 (0.06)       | 77 (0.12)         | 109 (0.04)       | 115 (0.18)             | 293 (0.12)       |
| Person-years               | 425,877                  | 1,570,752        | 425,066              | 1,565,997        | 429,121                      | 1,578,247        | 429,555           | 1,579,238        | 428,400                | 1,575,663        |
| IR (per 1000 person-years) | 0.34                     | 0.18             | 0.7                  | 0.52             | 0.17                         | 0.09             | 0.18              | 0.07             | 0.27                   | 0.19             |
| Follow-up, Median(IQR)     | 5.62 (2.45-10.10)        | 5.16 (2.15-9.51) | 5.61 (2.45-10.08)    | 5.15 (2.14-9.51) | 5.62 (2.45-10.11)            | 5.17 (2.15-9.51) | 5.63 (2.46-10.10) | 5.17 (2.15-9.51) | 5.62 (2.45-10.10)      | 5.16 (2.15-9.51) |
| HR (95% CI)*               | 1.89 (1.55-2.32)         |                  | 1.33 (1.17-1.52)     |                  | 1.93 (1.46-2.56)             |                  | 2.58 (1.92-3.45)  |                  | 1.45 (1.17-1.80)       |                  |
| P value                    | p<0.01                   |                  | p<0.01               |                  | p<0.01                       |                  | p<0.01            |                  | p<0.01                 |                  |
| aHR (95% CI)**             | 1.80 (1.47-2.20)         |                  | 1.33 (1.16-1.52)     |                  | 1.93 (1.46-2.56)             |                  | 2.51 (1.87-3.38)  |                  | 1.37 (1.10-1.71)       |                  |
| P value                    | p<0.01                   |                  | p<0.01               |                  | p<0.01                       |                  | p<0.01            |                  | p<0.01                 |                  |
|                            | Psoriasis                |                  | Pernicious anaemia   |                  | Inflammatory bowel disease   |                  | Coeliac           |                  | Autoimmune thyroiditis |                  |
|                            | Exposed                  | Unexposed        | Exposed              | Unexposed        | Exposed                      | Unexposed        | Exposed           | Unexposed        | Exposed                | Unexposed        |
| Number of patients         | 61,764                   | 243,056          | 64,148               | 250,423          | 63,819                       | 249,394          | 64,173            | 250,585          | 64,170                 | 250,440          |
| Number of outcomes, n(%)   | 892 (1.44)               | 2,799 (1.15)     | 156 (0.24)           | 463 (0.18)       | 228 (0.36)                   | 667 (0.27)       | 121 (0.19)        | 334 (0.13)       | 99 (0.15)              | 298 (0.12)       |
| Person-years               | 408,643                  | 1,514,347        | 428,404              | 1,574,721        | 425,814                      | 1,566,813        | 428,547           | 1,575,926        | 428,443                | 1,574,813        |
| IR (per 1000 person-years) | 2.18                     | 1.85             | 0.36                 | 0.29             | 0.54                         | 0.43             | 0.28              | 0.21             | 0.23                   | 0.19             |

1  
2  
3  
4  
5  
6  
7  
8  
9  
10  
11  
12  
13  
14  
15  
16  
17  
18  
19  
20  
21  
22  
23  
24  
25  
26  
27  
28  
29  
30  
31  
32  
33  
34  
35  
36  
37  
38  
39  
40  
41  
42  
43  
44  
45  
46

|                        |                  |                  |                   |                  |                   |                  |                   |                  |                   |                  |
|------------------------|------------------|------------------|-------------------|------------------|-------------------|------------------|-------------------|------------------|-------------------|------------------|
| Follow-up, Median(IQR) | 5.55 (2.42-9.98) | 5.09 (2.11-9.44) | 5.62 (2.46-10.10) | 5.16 (2.15-9.51) | 5.61 (2.45-10.09) | 5.15 (2.14-9.51) | 5.62 (2.45-10.10) | 5.16 (2.15-9.51) | 5.62 (2.45-10.09) | 5.16 (2.15-9.51) |
| HR (95% CI)*           | 1.18 (1.10-1.27) |                  | 1.24 (1.03-1.48)  |                  | 1.26 (1.08-1.46)  |                  | 1.33 (1.08-1.64)  |                  | 1.22 (0.97-1.53)  |                  |
| P value                | p<0.01           |                  | p=0.02            |                  | p<0.01            |                  | p<0.01            |                  | p=0.08            |                  |
| aHR (95% CI)**         | 1.17 (1.09-1.27) |                  | 1.23 (1.02-1.47)  |                  | 1.25 (1.08-1.46)  |                  | 1.33 (1.08-1.64)  |                  | 1.19 (0.95-1.50)  |                  |
| P value                | p<0.01           |                  | p=0.03            |                  | p<0.01            |                  | p<0.01            |                  | p=0.13            |                  |

|                            | Scleroderma       |                  | All mental health conditions |                  | Depression       |                  | Anxiety          |                  | Severe mental illness |                  |
|----------------------------|-------------------|------------------|------------------------------|------------------|------------------|------------------|------------------|------------------|-----------------------|------------------|
|                            | Exposed           | Unexposed        | Exposed                      | Unexposed        | Exposed          | Unexposed        | Exposed          | Unexposed        | Exposed               | Unexposed        |
| Number of patients         | 64,337            | 251,067          | 45,237                       | 202,163          | 50,883           | 216,746          | 54,756           | 229,068          | 63,137                | 248,256          |
| Number of outcomes, n(%)   | 16 (0.02)         | 45 (0.02)        | 5,296 (11.71)                | 16,758 (8.29)    | 4,197 (8.25)     | 12,706 (5.86)    | 3,331 (6.08)     | 9,230 (4.03)     | 400 (0.63)            | 925 (0.37)       |
| Person-years               | 430,156           | 1,580,157        | 275,375                      | 1,184,298        | 318,974          | 1,299,096        | 345,927          | 1,386,791        | 421,760               | 1,561,193        |
| IR (per 1000 person-years) | 0.04              | 0.03             | 19.23                        | 14.15            | 13.16            | 9.78             | 9.63             | 6.66             | 0.95                  | 0.59             |
| Follow-up, Median(IQR)     | 5.63 (2.46-10.11) | 5.17 (2.15-9.51) | 4.93 (2.08-9.21)             | 4.61 (1.89-8.87) | 5.14 (2.19-9.48) | 4.77 (1.96-9.10) | 5.23 (2.23-9.53) | 4.88 (2.02-9.17) | 5.62 (2.46-10.10)     | 5.16 (2.14-9.51) |
| HR (95% CI)*               | 1.30 (0.74-2.31)  |                  | 1.36 (1.32-1.41)             |                  | 1.35 (1.31-1.40) |                  | 1.45 (1.39-1.51) |                  | 1.61 (1.43-1.81)      |                  |
| P value                    | p=0.36            |                  | p<0.01                       |                  | p<0.01           |                  | p<0.01           |                  | p<0.01                |                  |
| aHR (95% CI)**             | 1.32 (0.75-2.35)  |                  | 1.37 (1.33-1.42)             |                  | 1.36 (1.31-1.41) |                  | 1.44 (1.38-1.50) |                  | 1.59 (1.41-1.79)      |                  |
| P value                    | p=0.34            |                  | p<0.01                       |                  | p<0.01           |                  | p<0.01           |                  | p<0.01                |                  |

\* Unadjusted hazard ratio, IR: incidence rate, HR: hazard ratio, aHR: adjusted hazard ratio  
 \*\* Adjusted hazard ratio: adjusted for age, sex, body mass index, Townsend deprivation index, smoking status and ethnicity at baseline

## Sensitivity analysis: Incident only cohort

Of the total exposed cohort, 31,968 (49.7% of total exposed cohort) patients had an exposure code entered during the study period (incident cohort) and were matched to 126,278 (50.3% of total unexposed cohort) unexposed cohort (baseline characteristics are described in **eTable 2**). The median follow-up in this cohort was 3.4 years. The average age was 49 years, 43% of cohort were male and the proportion of obese patients, current smokers and deprivation quintiles were similar with the primary analysis.

In the incident only sensitivity analysis, the odds ratio of having chronic disease were similar to the primary cohort. There was an increased aOR of having CVD (1.42; 95% CI 1.36-1.49), CMD (1.14; 95% CI 1.10-1.19), AID (1.26; 95% CI 1.21-1.32) and MIH (1.71; 95% CI 1.66-1.76). Further details in appendix (**eTable 3**). When examining subsequent disease outcomes, there also remained an increased risk (described as an aHR) of developing CVD (1.17; 95% CI 1.10-1.24), CMD (1.07; 95% CI 1.02-1.12), AID (1.48; 95% CI 1.37-1.59) and MIH (1.47; 95% CI 1.40-1.53). Further details in appendix (**eTable 4**).

## Sensitivity analysis: Periodontitis only cohort

When restricting the analysis to only those with periodontitis, the exposed cohort of 3,384 patients (5.3% of the total exposed group) were matched to 12,893 patients (5.1% of the unexposed group). The median follow-up in this cohort was 3.6 years. The average age was 48 years, 46% of cohort were male and the proportion of other baseline characteristics were also similar to the primary analysis. Further details in appendix (**eTable 5**).

In this analysis, the odds ratio of having chronic disease were similar to the primary cohort. There was an increased aOR of having CVD (1.50; 95% CI 1.30-1.74), CMD (1.19; 95% CI 1.06-1.34), AID (1.32; 95% CI 1.15-1.52) and MIH (1.63; 95% CI 1.49-1.78). Further details can be seen in appendix (**eTable 6**). When examining subsequent disease outcomes, an increased risk (aHR) remained for developing CVD (1.31; 95% CI 1.12-1.52) and MIH (1.33;



1  
2  
3 95% CI 1.16-1.52) but not for CMD (0.96; 95% CI 0.85-1.10) and AID (1.21; 95% CI 0.96-1.51).  
4  
5 Further details demonstrated in appendix (**eTable 7**).  
6  
7  
8  
9

## 10 11 **DISCUSSION**

### 12 13 14 15 **Summary of key results**

16  
17  
18  
19 To our knowledge, this is the first attempt to synthesise data exploring the relationship  
20 between periodontal diseases and the development of chronic disease in a UK retrospective  
21 cohort derived from medical records. Our study demonstrates that the presence of a GP  
22 recorded diagnosis of a periodontal disease is moderately associated with an 18%, 7%  
23 (Although 26% risk of T2DM), 33% and 37% increased risk of CVD, CMD, AID and MIH  
24 respectively. This risk persisted when analysing patients who were diagnosed with a  
25 periodontal disease during the study period. However, in patients specifically with  
26 periodontitis, this risk was not evident for CMD or AID.  
27  
28  
29  
30  
31  
32  
33  
34

### 35 **Results in context of current literature**

36  
37  
38  
39 To date, research evaluating the association between periodontal diseases and systemic  
40 health has focussed on periodontitis, rather than gingivitis, due to the more extensive  
41 inflammatory process and thus the potential for greater systemic effects.  
42  
43  
44

45  
46 This study concurs with the extensive literature highlighting the association of  
47 atherosclerotic diseases with periodontal disease. Humphrey et al, demonstrated a risk ratio  
48 of 1.24 (95 % CI 1.01 – 1.51) of a CVD/CHD event in the presence of periodontitis.<sup>55</sup> More  
49 recently a systematic review by Dietrich et al, demonstrated there was an increased risk of  
50 CVD when considering various periodontal disease measures ranging from probing pocket  
51 depth measurements to radiographic assessments of bone levels.<sup>56</sup> For those studies where  
52 severe periodontitis was the exposure, the associations with ACVD were stronger than in  
53  
54  
55  
56  
57  
58  
59  
60

1  
2  
3 our study. This may be due to limitations in our coding, whereby we were unable to classify  
4 the severity of periodontitis.  
5  
6

7  
8 There are several potential mechanisms explaining the increase in atherosclerosis in  
9 patients with periodontitis. Firstly, transient bacteraemia in patients with periodontitis may  
10 be pathogenic.<sup>57</sup> Furthermore, periodontitis patients have elevated circulating levels of pro-  
11 inflammatory mediators implicated in atherosclerosis.<sup>58</sup> There is robust evidence that  
12 treatment of periodontitis improves markers of systemic inflammation and surrogate  
13 markers of CVD risk such as flow-mediated dilatation.<sup>59,60</sup>  
14  
15  
16  
17  
18  
19

20 T2DM demonstrates a bi-directional relationship with periodontitis i.e. poorly controlled  
21 diabetes is a risk factor for periodontitis and periodontitis itself impacts the diabetes disease  
22 process. A systematic review commissioned by the International Diabetes Federation and  
23 EFP<sup>61</sup> concluded that individuals with periodontitis have a greater risk of developing T2DM  
24 with a HR 1.19 –1.33 which is in agreement with the increased aHR demonstrated in this  
25 study. Literature also exists investigating the impact of periodontal therapy on diabetic  
26 outcomes. A recent review demonstrates reductions in HbA1c (-0.40% at 3 months)  
27 following periodontal therapy.<sup>62</sup> Evidence suggests appropriate targeted screening in dental  
28 settings may successfully identify cases of undiagnosed diabetes.<sup>63,64</sup> Within the UK there is  
29 a drive to utilise the dental team in identifying and managing T2DM, evident by the recent  
30 publication of the NHS England Commissioning Standard '*Dental Care for People with*  
31 *Diabetes*'.<sup>65</sup> This document proposes a formalised pathway between general medical  
32 practitioner and dentist upon diagnosis of T2DM.  
33  
34  
35  
36  
37  
38  
39  
40  
41  
42  
43  
44

45 Whilst the evidence base for T2DM is long established, there is limited evidence that Type 1  
46 Diabetes (T1DM) demonstrates a similar relationship. Systematic reviews conducted in 2013  
47 and 2018 were unable to find any studies that met eligibility criteria investigating the  
48 association between periodontal health and T1DM.<sup>61,66</sup> The reason for this may be that the  
49 age of periodontal disease diagnosis is typically much older than the age of T1DM diagnosis  
50 which limits the available data to answer such a question. Our study suggests an increased  
51 risk for incident Type 1 Diabetes in patients with a periodontal disease (aHR 1.80; CI 1.47-  
52 2.20) but was not clearly evident when considering only those patients with periodontitis  
53 (aHR 1.62; CI 0.70-3.76).  
54  
55  
56  
57  
58  
59  
60

1  
2  
3 The mechanisms connecting mental health with periodontal inflammation include both  
4 behavioural and immunological. Existing literature focuses on depression and anxiety as risk  
5 factors for periodontitis. Individuals under increased stress may reduce health promoting  
6 behaviours (e.g. optimal oral hygiene practices) and instead be driven towards detrimental  
7 health behaviours (e.g. smoking). The research linking depression as a risk factor for  
8 periodontitis has been contradictory.<sup>67</sup>

9  
10  
11  
12  
13  
14  
15 Conversely, studies assessing mental health outcomes consequent upon periodontal  
16 diseases are sparse. Potential mechanisms underlying such a relation include psychological  
17 mechanisms with outcomes of periodontal diseases (e.g. halitosis, loss of teeth, drifting of  
18 teeth) impacting negatively on social and functional aspects of life, thus impacting on mood.  
19 One study utilised the well-established EuroQol questionnaire to review oral health in  
20 relation to anxiety/depression. In 10% of individuals with increased probing pocket depth  
21 ( $\geq 6$ mm) anxiety/depression was experienced 25% of the time.<sup>68</sup> Our study demonstrates a  
22 significantly increased risk of all mental health illnesses in patients with a periodontal  
23 disease (aOR 1.79; CI 1.75-1.83) and an increased risk of developing a mental health  
24 condition (aHR 1.37; CI 1.33-1.42). Whilst severe mental illness in particular did not  
25 demonstrate a significant increase in the incident only analysis of the periodontitis cohort,  
26 we found that individuals with periodontitis have a 37% increased risk of developing  
27 anxiety. Furthermore, within the same periodontitis cohort there was a significantly higher  
28 risk of developing depression (aHR 1.29; CI 1.11-1.50). This provides further evidence for the  
29 potential psychosocial impact of periodontal diseases and an issue that is under-reported in  
30 the literature.

31  
32  
33  
34  
35  
36  
37  
38  
39  
40  
41  
42  
43  
44  
45 Of the autoimmune conditions included within our analysis, the one most frequently  
46 reported in the context of periodontitis is RA. A number of mechanisms have been proposed  
47 linking the periodontium with the progression of RA. For example *P. gingivalis*, expresses  
48 peptidyl arginine deiminases (PADs), which drive protein citrullination. Exposure to  
49 citrullinated proteins in periodontitis patients may then lead to the generation of anti-  
50 citrullinated protein antibodies (ACPA), stimulating a systemic autoimmune response  
51 characteristic of RA.<sup>33</sup> A study analysing the third US National Health and Nutrition  
52 Examination Survey (NHANES III) identified that individuals with RA were more likely to  
53  
54  
55  
56  
57  
58  
59  
60

1  
2  
3 present with both periodontitis (OR 1.82; CI 1.04 – 3.20) and edentulism (OR 2.27; CI 1.56 –  
4 3.31).<sup>69</sup> Our data support an association between periodontal diseases and development of  
5 RA. For periodontitis alone, the increased risk of RA at baseline approached significance,  
6 although no significant risk was identified for subsequent development of RA. This may be  
7 attributed to the low number of outcomes during this subset analysis and is in agreement  
8 with a previous study based on the Taiwanese National Health Insurance Research Database  
9 (NHIRD).<sup>70</sup> The Taiwanese study also demonstrated an increased risk of developing Sjogren’s  
10 syndrome in patients with chronic periodontitis (CP) (HR 1.87; CI 1.64 – 2.13.)<sup>71</sup> Our study  
11 also demonstrates the most substantial increased risk ratio was seen in the development of  
12 Sjogren’s syndrome in those with periodontal diseases (HR 2.51; CI 1.87-3.38), with the  
13 periodontitis only cohort showing a substantial increased hazard ratio; however, the low  
14 number of outcomes means that the results must be interpreted with caution (aHR 6.67; CI  
15 1.66-26.86). Despite these significant findings, the pathophysiology explaining this  
16 relationship is well understood. It is apparent that both conditions may present with  
17 xerostomia leading to bacterial overgrowth in the oral cavity and over expression of pro-  
18 inflammatory cytokines which may in turn act as risk factors for either periodontal disease  
19 or Sjogren’s syndrome progression.<sup>32</sup> In addition to the known relationship between  
20 successful periodontal treatment and glycaemic management, there is an emerging field of  
21 literature identifying that periodontal treatment can lower levels of oral bacteria and  
22 circulating inflammatory markers.<sup>72</sup> Although, the relevance on how this relationship may  
23 translate into clinical endpoints such as the reduced incidence of chronic conditions is still  
24 unclear and requires further research.  
25  
26  
27  
28  
29  
30  
31  
32  
33  
34  
35  
36  
37  
38  
39  
40  
41  
42  
43  
44  
45  
46  
47

## 48 Limitations

49  
50  
51 The primary limitation is that the validity of the results rely upon the accuracy of  
52 documentation by the healthcare professionals contributing to the dataset. To date, the  
53 accuracy of oral health read codes in primary care datasets have not been validated<sup>73</sup>.  
54 However, it is important to highlight that in the UK GPs are not usually the professionals  
55 responsible for diagnosing periodontal disease and this is typically identified by dental  
56  
57  
58  
59  
60

1  
2  
3 practitioners based on a clinical examination. Periodontal Read codes are thus likely to be  
4 inputted following receipt of clinical letters from dental healthcare professional, though GP  
5 diagnosis (more likely for gingivitis) and self-report are also possibilities. Overall, it is likely  
6 that there is under recording of periodontal diseases in this data set i.e. it is likely that  
7 patients with a periodontal disease are not recorded as having it. Therefore, it is possible  
8 our findings may not reflect the true effect size and are likely to be an underestimate. On  
9 the other hand, selective recording of severe periodontal disease might have led to an  
10 overestimation of the true effect size.  
11  
12  
13  
14  
15  
16  
17  
18

## 19 Conclusion

20  
21  
22 In conclusion, this study demonstrates that periodontal diseases (including gingivitis and  
23 periodontitis) are moderately associated with an increased risk of developing  
24 cardiovascular, cardiometabolic, autoimmune diseases and mental ill health; and these  
25 were statistically significant. With this in mind, it is important to highlight patients with  
26 periodontal diseases and to tackle risk factors to prevent the development and progression  
27 of such conditions. It is imperative that preventative approaches, including those aimed at  
28 preventing and detecting gingival inflammation and its associated consequences, and  
29 improved communication between medical and dental teams, are implemented to reduce  
30 the risk of ill health. We also stress the importance of improving dental coding as per the  
31 2017 periodontal classification system in general practice settings to support holistic patient  
32 care and oral epidemiological research.<sup>74</sup> An important implication of our findings is the  
33 need for effective communication between dental and other health care professionals to  
34 ensure patients obtain an effective treatment plan targeting both oral and extra-oral health  
35 to improve current health and reduce the risk of future ill health.  
36  
37  
38  
39  
40  
41  
42  
43  
44  
45  
46  
47  
48  
49  
50  
51  
52  
53  
54  
55  
56  
57  
58  
59  
60

## References

- 1 GBD 2017 Disease and Injury Incidence and Prevalence Collaborators SL, Abate D, Abate KH, Abay SM, Abbafati C, Abbasi N *et al*. Global, regional, and national incidence, prevalence, and years lived with disability for 354 diseases and injuries for 195 countries and territories, 1990-2017: a systematic analysis for the Global Burden of Disease Study 2017. *Lancet (London, England)* 2018; **392**: 1789–1858.
- 2 Kinane DF, Stathopoulou PG, Papapanou PN. Periodontal diseases. *Nat. Rev. Dis. Prim.* 2017; **3**: 1–14.
- 3 Centers for Disease Control and Prevention. Periodontal Disease. 2013. <https://www.cdc.gov/oralhealth/conditions/periodontal-disease.html> (accessed 30 Sep2020).
- 4 Mombelli A, Casagni F, Madianos PN. Can presence or absence of periodontal pathogens distinguish between subjects with chronic and aggressive periodontitis? A systematic review. *J. Clin. Periodontol.* 2002; **29**: 10–21.
- 5 Kinane DF, Demuth DR, Gorr SU, Hajishengallis GN, Martin MH. Human variability in innate immunity. *Periodontol 2000* 2007; **45**: 14–34.
- 6 Hajishengallis G, Lamont RJ. Beyond the red complex and into more complexity: The polymicrobial synergy and dysbiosis (PSD) model of periodontal disease etiology. *Mol Oral Microbiol* 2012; **27**: 409–419.
- 7 Gift HC, Reisine ST, Larach DC. The social impact of dental problems and visits. *Am J Public Health* 1992; **82**: 1663–1668.
- 8 Slade GD. *Measuring Oral Health and Quality of Life*. Chapel Hill, 1997.
- 9 Miller AH, Raison CL. The role of inflammation in depression: From evolutionary imperative to modern treatment target. *Nat. Rev. Immunol.* 2016; **16**: 22–34.
- 10 Dantzer R, O'Connor JC, Lawson MA, Kelley KW. Inflammation-associated depression: From serotonin to kynurenine. *Psychoneuroendocrinology.* 2011; **36**: 426–436.
- 11 Fan X, Goff DC, Henderson DC. Inflammation and schizophrenia. *Expert Rev. Neurother.* 2007; **7**: 789–796.
- 12 Calle MC, Fernandez ML. Inflammation and type 2 diabetes. *Diabetes Metab.* 2012; **38**: 183–191.
- 13 Berg AH, Scherer PE. Adipose tissue, inflammation, and cardiovascular disease. *Circ. Res.* 2005; **96**: 939–949.
- 14 GBD 2017 Causes of Death Collaborators GA, Abate D, Abate KH, Abay SM, Abbafati

- 1  
2  
3 C, Abbasi N *et al.* Global, regional, and national age-sex-specific mortality for 282  
4 causes of death in 195 countries and territories, 1980-2017: a systematic analysis for  
5 the Global Burden of Disease Study 2017. *Lancet (London, England)* 2018; **392**: 1736–  
6 1788.  
7  
8  
9 15 Postolache TT, Makkar H, Wadhawan A, Dagdag A, Reynolds MA, Merchant AT.  
10 Periodontal, metabolic, and cardiovascular disease: Exploring the role of  
11 inflammation and mental health. *Pteridines*. 2018; **29**: 124–163.  
12  
13 16 Chandan JS, Thomas T. The impact of inflammatory bowel disease on oral health. *Br*  
14 *Dent J* 2017; **222**: 549–553.  
15  
16 17 Thomas T, Chandan JS. Multidisciplinary management: Inflammatory bowel disease.  
17 *Br. Dent. J.* 2017; **222**: 4–5.  
18  
19 18 Linden GJ, Linden K, Yarnell J, Evans A, Kee F, Patterson CC. All-cause mortality and  
20 periodontitis in 60-70-year-old men: a prospective cohort study. *J Clin Periodontol*  
21 2012; **39**: 940–946.  
22  
23 19 Kinane DF, Chestnutt IG. Smoking and Periodontal Disease. *Crit Rev Oral Biol Med*  
24 2000; **11**: 356–365.  
25  
26 20 Kassebaum NJ, Bernabé E, Dahiya M, Bhandari B, Murray CJL, Marcenes W. Global  
27 burden of severe periodontitis in 1990-2010: A systematic review and meta-  
28 regression. *J. Dent. Res.* 2014; **93**: 1045–1053.  
29  
30 21 Eke PI, Wei L, Thornton-Evans GO, Borrell LN, Borgnakke WS, Dye B *et al.* Risk  
31 Indicators for Periodontitis in US Adults: NHANES 2009 to 2012. *J Periodontol* 2016;  
32 **87**: 1174–1185.  
33  
34 22 Eke PI, Dye BA, Wei L, Thornton-Evans GO, Genco RJ. Prevalence of periodontitis in  
35 adults in the united states: 2009 and 2010. *J Dent Res* 2012; **91**: 914–920.  
36  
37 23 Lockhart PB, Bolger AF, Papapanou PN, Osinbowale O, Trevisan M, Levison ME *et al.*  
38 Periodontal disease and atherosclerotic vascular disease: Does the evidence support  
39 an independent association?: A scientific statement from the American heart  
40 association. *Circulation* 2012; **125**: 2520–2544.  
41  
42 24 Lafon A, Pereira B, Dufour T, Rigouby V, Giroud M, Béjot Y *et al.* Periodontal disease  
43 and stroke: a meta-analysis of cohort studies. *Eur J Neurol* 2014; **21**: 1155-e67.  
44  
45 25 Leng WD, Zeng XT, Kwong JSW, Hua XP. Periodontal disease and risk of coronary  
46 heart disease: An updated meta-analysis of prospective cohort studies. *Int J Cardiol*  
47 2015; **201**: 469–472.  
48  
49 26 Sanz M, Marco del Castillo A, Jepsen S, Gonzalez-Juanatey JR, D’Aiuto F, Bouchard P  
50 *et al.* Periodontitis and cardiovascular diseases: Consensus report. *J Clin Periodontol*  
51 2020. doi:10.1111/jcpe.13189.  
52  
53  
54  
55  
56  
57  
58  
59  
60



- 1  
2  
3 27 D'Aiuto F, Gkranias N, Bhowruth D, Khan T, Orlandi M, Suvan J *et al*. Systemic effects  
4 of periodontitis treatment in patients with type 2 diabetes: a 12 month, single-centre,  
5 investigator-masked, randomised trial. *Lancet Diabetes Endocrinol* 2018; **6**: 954–965.  
6  
7  
8 28 Seitz MW, Listl S, Bartols A, Schubert I, Blaschke K, Haux C *et al*. Current Knowledge  
9 on Correlations Between Highly Prevalent Dental Conditions and Chronic Diseases: An  
10 Umbrella Review. *Prev Chronic Dis* 2019; **16**: 180641.  
11  
12 29 Engebretson S, Kocher T. Evidence that periodontal treatment improves diabetes  
13 outcomes: a systematic review and meta-analysis. *J Clin Periodontol* 2013; **40**: S153–  
14 S163.  
15  
16  
17 30 D'Aiuto F, Gable D, Syed Z, Allen Y, Wanyonyi KL, White S *et al*. Evidence summary:  
18 The relationship between oral diseases and diabetes. *Br Dent J* 2017; **222**: 944–948.  
19  
20 31 Bingham CO, Moni M. Periodontal disease and rheumatoid arthritis: The evidence  
21 accumulates for complex pathobiologic interactions. *Curr. Opin. Rheumatol.* 2013; **25**:  
22 345–353.  
23  
24  
25 32 Lin CY, Tseng CF, Liu JM, Chuang HC, Lei W Te, Liu LYM *et al*. Association between  
26 periodontal disease and subsequent sjögren's syndrome: A nationwide population-  
27 based cohort study. *Int J Environ Res Public Health* 2019; **16**.  
28 doi:10.3390/ijerph16050771.  
29  
30  
31 33 de Pablo P, Chapple ILC, Buckley CD, Dietrich T. Periodontitis in systemic rheumatic  
32 diseases. *Nat Rev Rheumatol* 2009; **5**: 218–224.  
33  
34 34 Patel N, Milward M. The oral implications of mental health disorders part 2:  
35 depression. *Dent Update* 2019; **46**: 119–124.  
36  
37  
38 35 Kisely S, Sawyer E, Siskind D, Lalloo R. The oral health of people with anxiety and  
39 depressive disorders - A systematic review and meta-analysis. *J. Affect. Disord.* 2016;  
40 **200**: 119–132.  
41  
42  
43 36 Blak BT, Thompson M, Dattani H, Bourke A. Generalisability of The Health  
44 Improvement Network (THIN) database: demographics, chronic disease prevalence  
45 and mortality rates. *Inform Prim Care* 2011; **19**: 251–5.  
46  
47  
48 37 Booth N. What are the Read Codes? *Health Libr Rev* 1994; **11**: 177–82.  
49  
50 38 Maguire A, Blak BT, Thompson M. The importance of defining periods of complete  
51 mortality reporting for research using automated data from primary care.  
52 *Pharmacoepidemiol Drug Saf* 2009; **18**: 76–83.  
53  
54  
55 39 Horsfall L, Walters K, Petersen I. Identifying periods of acceptable computer usage in  
56 primary care research databases. *Pharmacoepidemiol Drug Saf* 2013; **22**: 64–69.  
57  
58 40 Gokhale KM, Chandan JS, Toulis K, Gkoutos G, Tino P, Nirantharakumar K. Data  
59 extraction for epidemiological research (DExtER): a novel tool for automated clinical  
60



- epidemiology studies. *Eur J Epidemiol* 2020. doi:10.1007/s10654-020-00677-6.
- 41 Chandan JS, Keerthy D, Zemedikun DT, Okoth K, Gokhale KM, Raza K *et al*. The association between exposure to childhood maltreatment and the subsequent development of functional somatic and visceral pain syndromes. *EClinicalMedicine* 2020; **0**: 100392.
- 42 Chandan JS, Thomas T, Bradbury-Jones C, Taylor J, Bandyopadhyay S, Nirantharakumar K. Intimate partner violence and temporomandibular joint disorder. *J Dent* 2019; **82**: 98–100.
- 43 NHS Digital. Quality and Outcomes Framework (QOF) business rules v42 2019-2020 baseline release - NHS Digital. 2019. <https://digital.nhs.uk/data-and-information/data-collections-and-data-sets/data-collections/quality-and-outcomes-framework-qof/quality-and-outcome-framework-qof-business-rules/quality-and-outcomes-framework-qof-business-rules-v42-2019-2020-baseline-releas> (accessed 31 Jul2019).
- 44 Krishna MT, Subramanian A, Adderley NJ, Zemedikun DT, Gkoutos G V., Nirantharakumar K. Allergic diseases and long-term risk of autoimmune disorders: Longitudinal cohort study and cluster analysis. *Eur Respir J* 2019; **54**. doi:10.1183/13993003.00476-2019.
- 45 Chandan JS, Thomas T, Gokhale KM, Bandyopadhyay S, Taylor J, Nirantharakumar K. The burden of mental ill health associated with childhood maltreatment in the UK, using The Health Improvement Network database: a population-based retrospective cohort study. *The Lancet Psychiatry* 2019; **6**: 926–934.
- 46 Chandan JS, Thomas T, Bradbury-Jones C, Russell R, Bandyopadhyay S, Nirantharakumar K *et al*. Female survivors of intimate partner violence and risk of depression, anxiety and serious mental illness. *Br J Psychiatry* 2019; : 1–6.
- 47 Chandan JS, Thomas T, Bradbury-Jones C, Taylor J, Bandyopadhyay S, Nirantharakumar K. Risk of Cardiometabolic Disease and All-Cause Mortality in Female Survivors of Domestic Abuse. *J Am Heart Assoc* 2020; **9**. doi:10.1161/JAHA.119.014580.
- 48 Chandan JS, Okoth K, Gokhale KM, Bandyopadhyay S, Taylor J, Nirantharakumar K. Increased Cardiometabolic and Mortality Risk Following Childhood Maltreatment in the United Kingdom. *J Am Heart Assoc* 2020; **9**. doi:10.1161/JAHA.119.015855.
- 49 Chandan JS, Thomas T, Lee S, Marshall T, Willis B, Nirantharakumar K *et al*. The association between idiopathic thrombocytopenic purpura and cardiovascular disease: a retrospective cohort study. *J Thromb Haemost* 2018; **16**: 474–480.
- 50 Thomas T, Chandan JS, Subramanian A, Gokhale K, Gkoutos G, Harper L *et al*. Epidemiology, morbidity and mortality in Behçet’s disease: a cohort study using The Health Improvement Network (THIN). *Rheumatology* 2020. doi:10.1093/rheumatology/keaa010.

- 1  
2  
3  
4 51 Goel R, Chandan JS, Thayakaran R, Adderley NJ, Nirantharakumar K, Harper L. Cardiovascular and renal morbidity in Takayasu arteritis: a population-based retrospective cohort study from UK. *Arthritis Rheumatol* 2020; : art.41529.  
5  
6  
7  
8 52 Chandan JS, Keerthy D, Gokhale KM, Bradbury-Jones C, Raza K, Bandyopadhyay S *et al*. The association between exposure to domestic abuse in women and the development of syndromes indicating central nervous system sensitization: A retrospective cohort study using UK primary care records. *Eur J Pain* 2021; : ejp.1750.  
9  
10  
11  
12  
13 53 Townsend P, Phillimore P, Beattie A. Health and deprivation: inequality and the North. 1988. *London Croom Helm Google Sch* 1988.  
14  
15  
16  
17 54 Lévesque LE, Hanley JA, Kezouh A, Suissa S. Problem of immortal time bias in cohort studies: example using statins for preventing progression of diabetes. *BMJ* 2010; **340**: b5087.  
18  
19  
20  
21  
22 55 Humphrey LL, Fu R, Buckley DI, Freeman M, Helfand M. Periodontal Disease and Coronary Heart Disease Incidence: A Systematic Review and Meta-analysis. *J Gen Intern Med* 2008; **23**: 2079–2086.  
23  
24  
25  
26 56 Dietrich T, Sharma P, Walter C, Weston P, Beck J. The epidemiological evidence behind the association between periodontitis and incident atherosclerotic cardiovascular disease. *J Clin Periodontol* 2013; **40**: S70–S84.  
27  
28  
29  
30  
31 57 Haraszthy VI, Zambon JJ, Trevisan M, Zeid M, Genco RJ. Identification of Periodontal Pathogens in Atheromatous Plaques. *J Periodontol* 2000; **71**: 1554–1560.  
32  
33  
34  
35 58 Paraskevas S, Huizinga JD, Loos BG. A systematic review and meta-analyses on C-reactive protein in relation to periodontitis. *J Clin Periodontol* 2008; **35**: 277–290.  
36  
37  
38 59 D’Aiuto F, Orlandi M, Gunsolley JC. Evidence that periodontal treatment improves biomarkers and CVD outcomes. *J Clin Periodontol* 2013; **40**: S85–S105.  
39  
40  
41  
42 60 Tonetti MS, D’Aiuto F, Nibali L, Donald A, Storry C, Parkar M *et al*. Treatment of Periodontitis and Endothelial Function. *N Engl J Med* 2007; **356**: 911–920.  
43  
44  
45 61 Graziani F, Gennai S, Solini A, Petrini M. A systematic review and meta-analysis of epidemiologic observational evidence on the effect of periodontitis on diabetes An update of the EFP-AAP review. *J Clin Periodontol* 2018; **45**: 167–187.  
46  
47  
48  
49 62 Madianos PN, Koromantzos PA. An update of the evidence on the potential impact of periodontal therapy on diabetes outcomes. *J Clin Periodontol* 2018; **45**: 188–195.  
50  
51  
52  
53 63 Lalla E, Kunzel C, Burkett S, Cheng B, Lamster IB. Identification of Unrecognized Diabetes and Pre-diabetes in a Dental Setting. *J Dent Res* 2011; **90**: 855–860.  
54  
55  
56  
57 64 Genco RJ, Schifferle RE, Dunford RG, Falkner KL, Hsu WC, Balukjian J. Screening for diabetes mellitus in dental practices: A field trial. *J Am Dent Assoc* 2014; **145**: 57–64.  
58  
59  
60

- 1  
2  
3 65 Commissioning Standard for Restorative Dentistry NHS England and NHS  
4 Improvement. .  
5  
6  
7 66 Borgnakke WS, Ylöstalo P V., Taylor GW, Genco RJ. Effect of periodontal disease on  
8 diabetes: systematic review of epidemiologic observational evidence. *J Clin*  
9 *Periodontol* 2013; **40**: S135–S152.  
10  
11 67 Araújo MM, Martins CC, Costa LCM, Cota LOM, Faria RLAM, Cunha FA *et al.*  
12 Association between depression and periodontitis: a systematic review and meta-  
13 analysis. *J Clin Periodontol* 2016; **43**: 216–228.  
14  
15  
16 68 Brennan DS, Spencer AJ, Roberts-Thomson KF. Quality of life and disability weights  
17 associated with periodontal disease. *J Dent Res* 2007; **86**: 713–7.  
18  
19  
20 69 De Pablo P, Dietrich T, McAlindon TE. Association of periodontal disease and tooth  
21 loss with rheumatoid arthritis in the US population. *J Rheumatol* 2008; **35**: 70–76.  
22  
23 70 Chen H-H, Huang N, Chen Y-M, Chen T-J, Chou P, Lee Y-L *et al.* Association between a  
24 history of periodontitis and the risk of rheumatoid arthritis: a nationwide, population-  
25 based, case–control study. *Ann Rheum Dis* 2013; **72**: 1206–1211.  
26  
27  
28 71 Lin T-C, Tseng C-F, Wang Y-H, Yu H-C, Chang Y-C. Patients with chronic periodontitis  
29 present increased risk for primary Sjögren syndrome: a nationwide population-based  
30 cohort study. *PeerJ* 2018; **6**. doi:10.7717/PEERJ.5109.  
31  
32 72 Borgnakke WS. Does Treatment of Periodontal Disease Influence Systemic Disease?  
33 *Dent Clin North Am* 2015; **59**: 885–917.  
34  
35  
36 73 McBrien KA, Souri S, Symonds NE, Rouhi A, Lethebe BC, Williamson TS *et al.*  
37 Identification of validated case definitions for medical conditions used in primary care  
38 electronic medical record databases: a systematic review. *J Am Med Informatics*  
39 *Assoc* 2018; **25**: 1567–1578.  
40  
41  
42 74 Dietrich T, Ower P, Tank M, West NX, Walter C, Needleman I *et al.* Periodontal  
43 diagnosis in the context of the 2017 classification system of periodontal diseases and  
44 conditions – implementation in clinical practice. *Br Dent J* 2019 2261 2019; **226**: 16–  
45 22.  
46  
47  
48  
49  
50  
51  
52  
53  
54  
55  
56  
57  
58  
59  
60

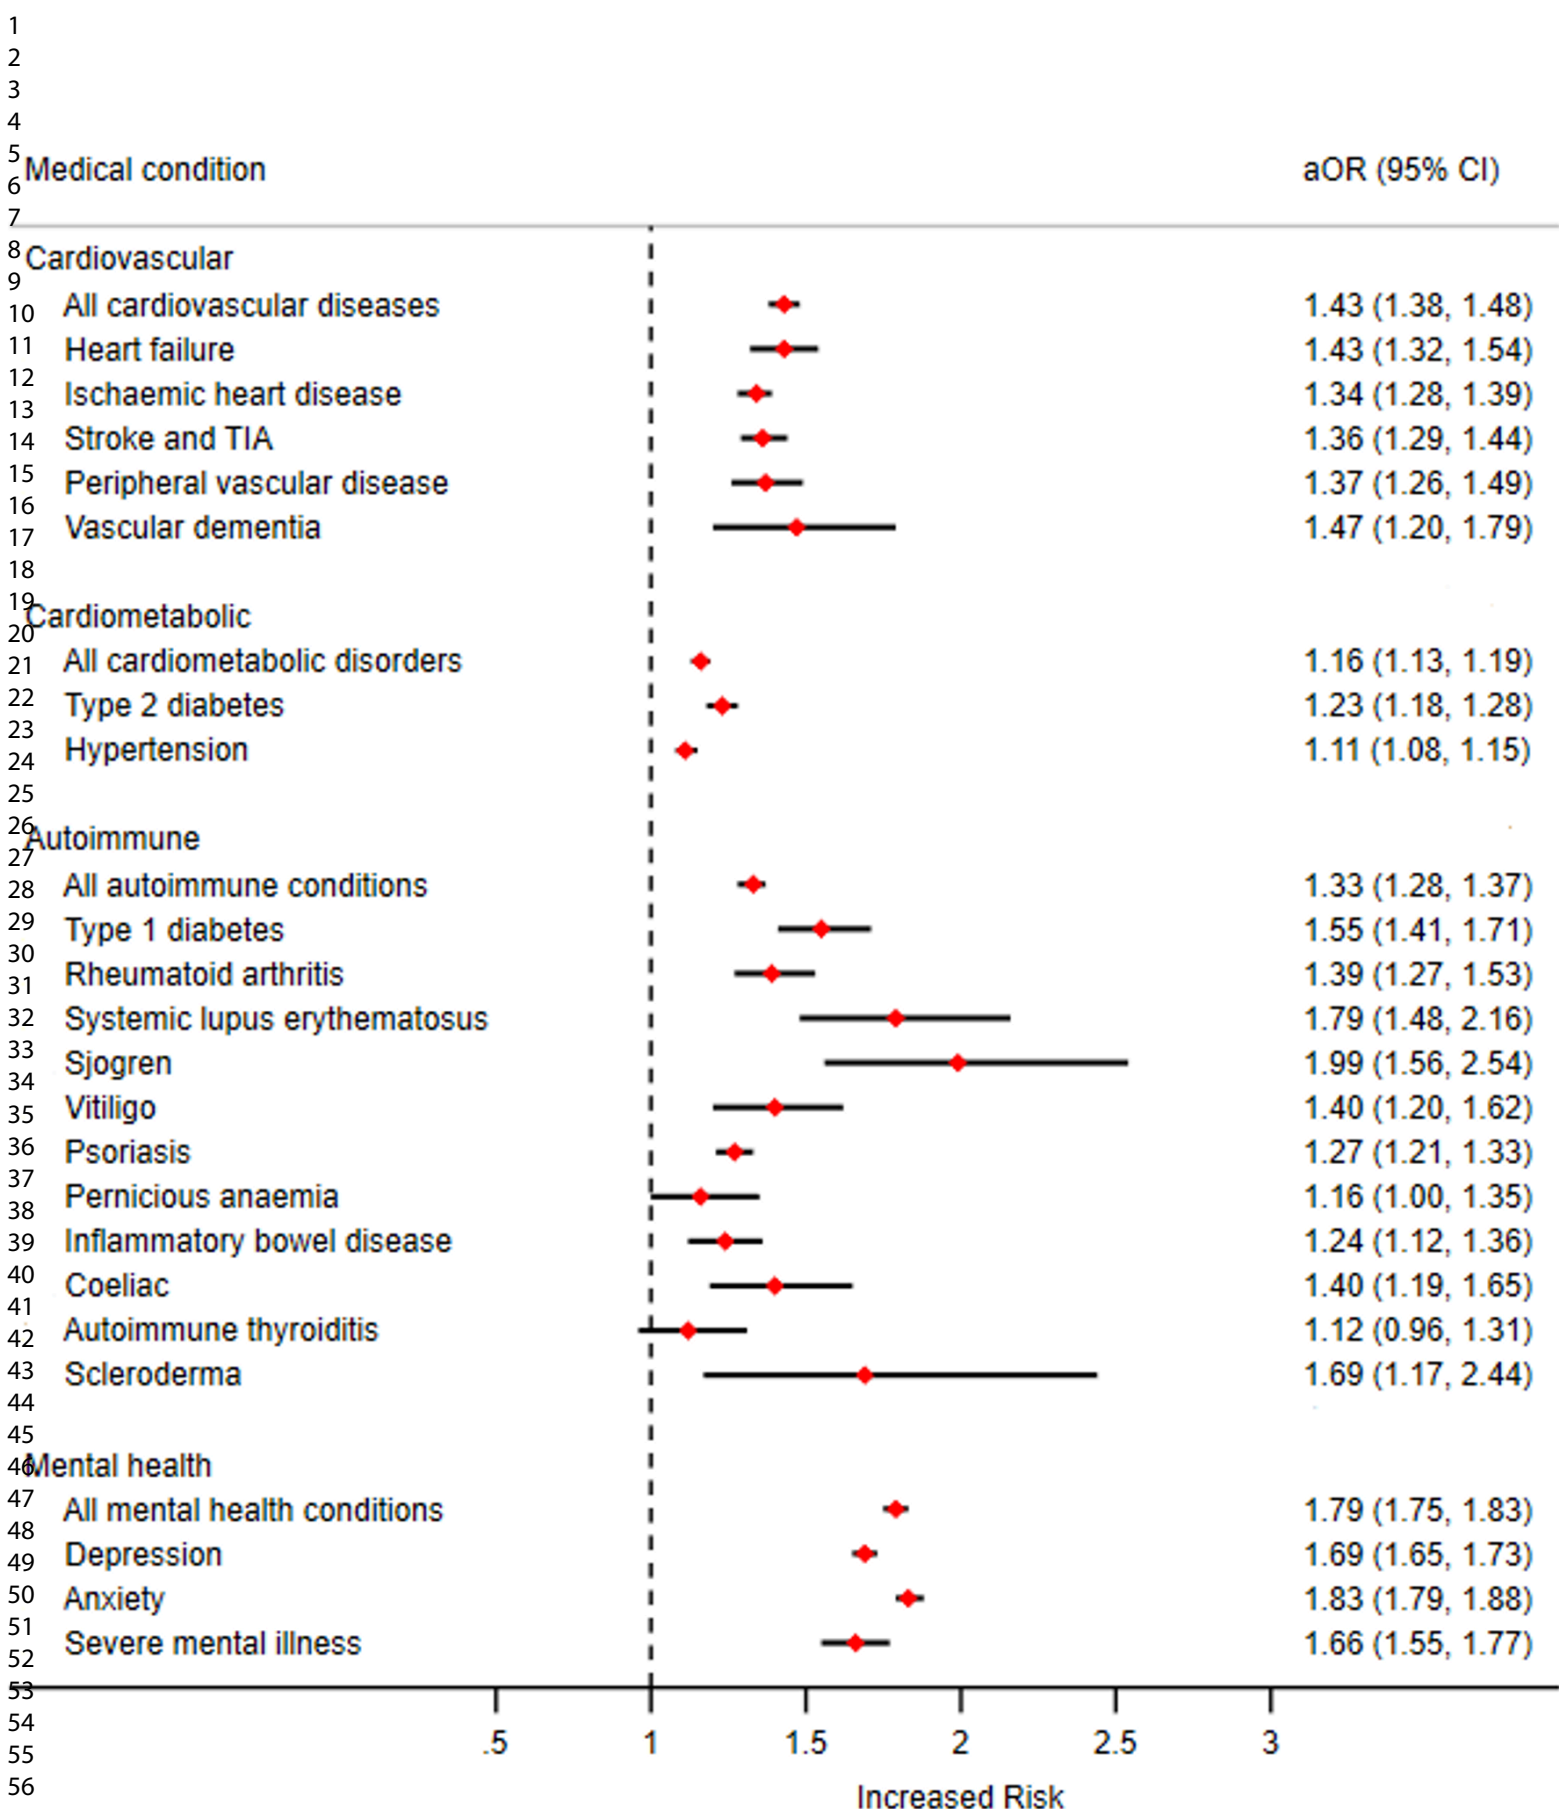

TIA: transient ischemic attack, aOR: adjusted odds ratio, CI: confidence interval

1

2

3

4

5

6 Medical condition

aHR (95% CI)

7

## 8 Cardiovascular

9 All cardiovascular diseases

1.18 (1.13, 1.23)

10 Heart failure

1.15 (1.07, 1.24)

11 Ischaemic heart disease

1.22 (1.16, 1.30)

12 Stroke and TIA

1.16 (1.10, 1.23)

13 Peripheral vascular disease

1.12 (0.97, 1.29)

14 Vascular dementia

1.07 (1.03, 1.10)

15

## 16 Cardiometabolic

17 All cardiometabolic disorders

1.26 (1.21, 1.32)

18 Type 2 diabetes

1.26 (1.21, 1.32)

19 Hypertension

1.02 (0.98, 1.05)

20

## 21 Autoimmune

22 All autoimmune conditions

1.33 (1.26, 1.40)

23 Type 1 diabetes

1.80 (1.47, 2.20)

24 Rheumatoid arthritis

1.33 (1.16, 1.52)

25 Systemic lupus erythematosus

1.93 (1.46, 2.56)

26 Sjogren

2.51 (1.87, 3.38)

27 Vitiligo

1.37 (1.10, 1.71)

28 Psoriasis

1.17 (1.09, 1.27)

29 Pernicious anaemia

1.23 (1.02, 1.47)

30 Inflammatory bowel disease

1.25 (1.08, 1.46)

31 Coeliac

1.33 (1.08, 1.64)

32 Autoimmune thyroiditis

1.19 (0.95, 1.50)

33 Scleroderma

1.32 (0.75, 2.35)

34

## 35 Mental health

36 All mental health conditions

1.37 (1.33, 1.42)

37 Depression

1.36 (1.31, 1.41)

38 Anxiety

1.44 (1.38, 1.50)

39 Severe mental illness

1.59 (1.41, 1.79)

40

41

42

43

44

45

46

47

48

49

50

51

52

53

54

55

.5

1

1.5

2

2.5

3

Increased Risk

TIA: transient ischemic attack, aHR: adjusted hazard ratio, CI: confidence interval

56

57

58

59

60

## Supplementary materials

**eTable 1. Read codes for periodontal disease exposure.**

### Gingivitis

| Code    | Description                          |
|---------|--------------------------------------|
| 2552    | O/E - gingivitis                     |
| 2556    | O/E - bleeding gums                  |
| J031z00 | Chronic gingivitis NOS               |
| 1928    | Bleeding gums                        |
| J030.00 | Acute gingivitis                     |
| J031.11 | Gingivitis                           |
| J031.00 | Chronic gingivitis                   |
| J031300 | Hyperplastic gingivitis              |
| J031200 | Desquamative gingivitis              |
| J031100 | Ulcerative gingivitis                |
| J03..11 | Gingivitis/gingival disease          |
| J031000 | Simple marginal gingivitis           |
| J03z.00 | Gingival and periodontal disease NOS |

### Periodontitis

| Code    | Description                                    |
|---------|------------------------------------------------|
| J033200 | Paradental abscess                             |
| J034400 | Alveolar pyorrhoea                             |
| J033300 | Periodontal abscess                            |
| J03..12 | Periodontal disease                            |
| J033.00 | Acute periodontitis                            |
| 2553    | O/E - pyorrhoea                                |
| J051200 | Loss of teeth due to local periodontal disease |
| J034200 | Chronic periodontitis simplex                  |
| J033z00 | Acute periodontitis NOS                        |
| J034.00 | Chronic periodontitis                          |
| J035.00 | Periodontosis                                  |
| J034z00 | Chronic periodontitis NOS                      |



**eTable 2. Baseline characteristics of the incident cohort**

|                               | Incident cohort  |                    |
|-------------------------------|------------------|--------------------|
|                               | Exposed<br>n (%) | Unexposed<br>n (%) |
| All                           | (n=31,968)       | (n=126,278)        |
| Sex (Male)                    | 13715 (42.90)    | 54062 (42.81)      |
| Age at index date             | 48.77 (18.77)    | 48.59 (18.67)      |
| Age categories                |                  |                    |
| 18 - 24 years                 | 3788 (11.85)     | 15081 (11.94)      |
| 25 - 34 years                 | 4921 (15.39)     | 19604 (15.52)      |
| 35 - 44 years                 | 5381 (16.83)     | 21272 (16.85)      |
| 45 - 54 years                 | 5411 (16.93)     | 21518 (17.04)      |
| 55 - 64 years                 | 5124 (16.03)     | 20212 (16.01)      |
| 65 - 74 years                 | 4028 (12.60)     | 15908 (12.60)      |
| 75 & overs                    | 3315 (10.37)     | 12683 (10.04)      |
| BMI                           | 26.60 (5.73)     | 26.62 (5.62)       |
| BMI Categories                |                  |                    |
| Under/Normal weight (18.5-25) | 11755 (36.77)    | 45183 (35.78)      |
| Overweight (25-30)            | 8573 (26.82)     | 34623 (27.42)      |
| Obese (>30)                   | 6192 (19.37)     | 23359 (18.50)      |
| Missing                       | 5448 (17.04)     | 23113 (18.30)      |
| Townsend quintiles            |                  |                    |
| 1 (Least deprived)            | 5813 (18.18)     | 21910 (17.35)      |
| 2                             | 5346 (16.72)     | 19600 (15.52)      |
| 3                             | 6118 (19.14)     | 22190 (17.57)      |
| 4                             | 6079 (19.02)     | 21452 (16.99)      |
| 5 (Most deprived)             | 4810 (15.05)     | 15776 (12.49)      |
| Missing                       | 3802 (11.89)     | 25350 (20.07)      |
| Smoking categories            |                  |                    |
| Non-smoker                    | 14514 (45.40)    | 57617 (45.63)      |
| Smoker                        | 9452 (29.57)     | 37338 (29.57)      |
| Ex-smoker                     | 6494 (20.31)     | 25445 (20.15)      |
| Missing                       | 1508 (4.72)      | 5878 (4.65)        |
| Ethnicity                     |                  |                    |
| Caucasian                     | 11976 (37.46)    | 49505 (39.20)      |
| Mixed race                    | 229 (0.72)       | 764 (0.61)         |
| Other                         | 101 (0.32)       | 358 (0.28)         |
| Black                         | 509 (1.59)       | 1415 (1.12)        |
| South Asian                   | 1510 (4.72)      | 2154 (1.71)        |
| Missing                       | 17643 (55.19)    | 72082 (57.08)      |

**eTable 3. Risk of chronic diseases at baseline in the incident only sensitivity analysis cohort**

|                                                     | All cardiovascular disease |               | Heart failure               |                | Ischaemic heart disease      |              | Stroke/transient-ischaemic attack |                | Peripheral vascular disease |              |
|-----------------------------------------------------|----------------------------|---------------|-----------------------------|----------------|------------------------------|--------------|-----------------------------------|----------------|-----------------------------|--------------|
|                                                     | Exposed                    | Unexposed     | Exposed                     | Unexposed      | Exposed                      | Unexposed    | Exposed                           | Unexposed      | Exposed                     | Unexposed    |
| Total number of patients                            | 31,968                     | 126,278       | 31,968                      | 126,278        | 31,968                       | 126,278      | 31,968                            | 126,278        | 31,968                      | 126,278      |
| Number of patients with condition at baseline, n(%) | 3,700 (11.57)              | 11,032 (8.74) | 524 (1.64)                  | 1,541 (1.22)   | 2,352 (7.36)                 | 7,022 (5.56) | 1,260 (3.94)                      | 3,660 (2.90)   | 478 (1.50)                  | 1,388 (1.10) |
| OR (95% CI)*                                        | 1.37 (1.31-1.42)           |               | 1.35 (1.22-1.49)            |                | 1.35 (1.29-1.42)             |              | 1.37 (1.29-1.47)                  |                | 1.37 (1.23-1.52)            |              |
| P value                                             | p<0.01                     |               | p<0.01                      |                | p<0.01                       |              | p<0.01                            |                | p<0.01                      |              |
| aOR (95% CI)**                                      | 1.42 (1.36-1.49)           |               | 1.30 (1.18-1.45)            |                | 1.35 (1.28-1.42)             |              | 1.36 (1.27-1.46)                  |                | 1.31 (1.18-1.46)            |              |
| P value                                             | p<0.01                     |               | p<0.01                      |                | p<0.01                       |              | p<0.01                            |                | p<0.01                      |              |
|                                                     | Vascular dementia          |               | All cardiometabolic disease |                | Type 2 diabetes mellitus     |              | Hypertension                      |                | All autoimmune conditions   |              |
|                                                     | Exposed                    | Unexposed     | Exposed                     | Unexposed      | Exposed                      | Unexposed    | Exposed                           | Unexposed      | Exposed                     | Unexposed    |
| Total number of patients, n                         | 31,968                     | 126,278       | 31,968                      | 126,278        | 31,968                       | 126,278      | 31,968                            | 126,278        | 31,968                      | 126,278      |
| Number of patients with condition at baseline, n(%) | 89 (0.28)                  | 204 (0.16)    | 7,488 (23.42)               | 26,602 (21.07) | 2,126 (6.65)                 | 6,773 (5.36) | 6,597 (20.64)                     | 23,995 (19.00) | 2,833 (8.86)                | 8,948 (7.09) |
| OR (95% CI)*                                        | 1.73 (1.34-2.21)           |               | 1.15 (1.11-1.18)            |                | 1.26 (1.20-1.32)             |              | 1.11 (1.08-1.14)                  |                | 1.28 (1.22-1.33)            |              |
| P value                                             | p<0.01                     |               | p<0.01                      |                | p<0.01                       |              | p<0.01                            |                | p<0.01                      |              |
| aOR (95% CI)**                                      | 1.64 (1.27-2.12)           |               | 1.14 (1.10-1.19)            |                | 1.15 (1.09-1.22)             |              | 1.10 (1.06-1.15)                  |                | 1.26 (1.21-1.32)            |              |
| P value                                             | p<0.01                     |               | p<0.01                      |                | p<0.01                       |              | p<0.01                            |                | p<0.01                      |              |
|                                                     | Type 1 diabetes mellitus   |               | Rheumatoid arthritis        |                | Systemic lupus erythematosus |              | Sjogren                           |                | Vitiligo                    |              |
|                                                     | Exposed                    | Unexposed     | Exposed                     | Unexposed      | Exposed                      | Unexposed    | Exposed                           | Unexposed      | Exposed                     | Unexposed    |
| Total number of patients, n                         | 31,968                     | 126,278       | 31,968                      | 126,278        | 31,968                       | 126,278      | 31,968                            | 126,278        | 31,968                      | 126,278      |



|                                                     |                    |              |                                     |                |                                   |                |                  |               |                               |              |
|-----------------------------------------------------|--------------------|--------------|-------------------------------------|----------------|-----------------------------------|----------------|------------------|---------------|-------------------------------|--------------|
| Number of patients with condition at baseline, n(%) | 304 (0.95)         | 836 (0.66)   | 403 (1.26)                          | 1,044 (0.83)   | 104 (0.33)                        | 189 (0.15)     | 58 (0.18)        | 119 (0.09)    | 130 (0.41)                    | 355 (0.28)   |
| OR (95% CI)*                                        | 1.44 (1.26-1.64)   |              | 1.53 (1.36-1.72)                    |                | 2.18 (1.71-2.77)                  |                | 1.93 (1.41-2.64) |               | 1.45 (1.18-1.77)              |              |
| P value                                             | p<0.01             |              | p<0.01                              |                | p<0.01                            |                | p<0.01           |               | p<0.01                        |              |
| aOR (95% CI)**                                      | 1.40 (1.23-1.61)   |              | 1.48 (1.32-1.67)                    |                | 2.14 (1.68-2.73)                  |                | 1.79 (1.30-2.47) |               | 1.31 (1.07-1.61)              |              |
| P value                                             | p<0.01             |              | p<0.01                              |                | p<0.01                            |                | p<0.01           |               | p=0.01                        |              |
|                                                     | <b>Psoriasis</b>   |              | <b>Pernicious anaemia</b>           |                | <b>Inflammatory bowel disease</b> |                | <b>Coeliac</b>   |               | <b>Autoimmune thyroiditis</b> |              |
|                                                     | Exposed            | Unexposed    | Exposed                             | Unexposed      | Exposed                           | Unexposed      | Exposed          | Unexposed     | Exposed                       | Unexposed    |
| Total number of patients, n                         | 31,968             | 126,278      | 31,968                              | 126,278        | 31,968                            | 126,278        | 31,968           | 126,278       | 31,968                        | 126,278      |
| Number of patients with condition at baseline, n(%) | 1,362 (4.26)       | 4,558 (3.61) | 134 (0.42)                          | 457 (0.36)     | 317 (0.99)                        | 1,031 (0.82)   | 119 (0.37)       | 336 (0.27)    | 104 (0.33)                    | 408 (0.32)   |
| OR (95% CI)*                                        | 1.19 (1.12-1.26)   |              | 1.16 (0.96-1.41)                    |                | 1.22 (1.07-1.38)                  |                | 1.40 (1.14-1.73) |               | 1.01 (0.81-1.25)              |              |
| P value                                             | p<0.01             |              | p=0.13                              |                | p<0.01                            |                | p<0.01           |               | p=0.95                        |              |
| aOR (95% CI)**                                      | 1.19 (1.12-1.27)   |              | 1.10 (0.90-1.34)                    |                | 1.21 (1.07-1.38)                  |                | 1.41 (1.14-1.74) |               | 0.98 (0.79-1.22)              |              |
| P value                                             | p<0.01             |              | p=0.35                              |                | p<0.01                            |                | p<0.01           |               | p=0.84                        |              |
|                                                     | <b>Scleroderma</b> |              | <b>All mental health conditions</b> |                | <b>Depression</b>                 |                | <b>Anxiety</b>   |               | <b>Severe mental illness</b>  |              |
|                                                     | Exposed            | Unexposed    | Exposed                             | Unexposed      | Exposed                           | Unexposed      | Exposed          | Unexposed     | Exposed                       | Unexposed    |
| Total number of patients, n                         | 31,968             | 126,278      | 31,968                              | 126,278        | 31,968                            | 126,278        | 31,968           | 126,278       | 31,968                        | 126,278      |
| Number of patients with condition at baseline, n(%) | 23 (0.07)          | 59 (0.05)    | 10,036 (31.39)                      | 27,197 (21.54) | 7,187 (22.48)                     | 19,341 (15.32) | 4,894 (15.31)    | 12,153 (9.62) | 703 (2.20)                    | 1,651 (1.31) |
| OR (95% CI)*                                        | 1.54 (0.95-2.49)   |              | 1.67 (1.62-1.71)                    |                | 1.60 (1.56-1.65)                  |                | 1.70 (1.64-1.76) |               | 1.70 (1.55-1.86)              |              |
| P value                                             | p=0.08             |              | p<0.01                              |                | p<0.01                            |                | p<0.01           |               | p<0.01                        |              |

|                |                  |                  |                  |                  |                  |
|----------------|------------------|------------------|------------------|------------------|------------------|
| aOR (95% CI)** | 1.45 (0.89-2.37) | 1.71 (1.66-1.76) | 1.63 (1.58-1.68) | 1.71 (1.65-1.78) | 1.68 (1.53-1.84) |
| P value        | p=0.14           | p<0.01           | p<0.01           | p<0.01           | p<0.01           |

\* Unadjusted odds ratio, OR: odds ratio, aOR: adjusted odds ratio

\*\* Adjusted odds ratio: adjusted for age, sex, body mass index, Townsend deprivation index, smoking status and ethnicity at baseline

For peer review only

**eTable 4. Risk of subsequent development of chronic diseases in the incident only sensitivity analysis**

|                            | All cardiovascular disease |                  | Heart failure               |                  | Ischaemic heart disease  |                  | Stroke/transient-ischaemic attack |                  | Peripheral vascular disease |                  |
|----------------------------|----------------------------|------------------|-----------------------------|------------------|--------------------------|------------------|-----------------------------------|------------------|-----------------------------|------------------|
|                            | Exposed                    | Unexposed        | Exposed                     | Unexposed        | Exposed                  | Unexposed        | Exposed                           | Unexposed        | Exposed                     | Unexposed        |
| Number of patients         | 28,268                     | 115,246          | 31,444                      | 124,737          | 29,616                   | 119,256          | 30,708                            | 122,618          | 31,490                      | 124,890          |
| Number of outcomes, n(%)   | 1,473 (5.21)               | 5,196 (4.51)     | 409 (1.30)                  | 1,455 (1.17)     | 715 (2.41)               | 2,303 (1.93)     | 745 (2.43)                        | 2,604 (2.12)     | 272 (0.86)                  | 784 (0.63)       |
| Person-years               | 171,643                    | 668,935          | 193,503                     | 734,319          | 180,791                  | 698,131          | 188,372                           | 718,635          | 193,366                     | 734,953          |
| IR (per 1000 person-years) | 8.58                       | 7.77             | 2.11                        | 1.98             | 3.95                     | 3.3              | 3.95                              | 3.62             | 1.41                        | 1.07             |
| Follow-up, Median(IQR)     | 5.37 (2.41-8.99)           | 4.99 (2.19-8.68) | 5.46 (2.47-9.12)            | 5.09 (2.24-8.80) | 5.41 (2.43-9.04)         | 5.05 (2.22-8.75) | 5.44 (2.47-9.08)                  | 5.06 (2.23-8.76) | 5.45 (2.46-9.11)            | 5.08 (2.24-8.80) |
| HR (95% CI)*               | 1.10 (1.04-1.17)           |                  | 1.06 (0.95-1.19)            |                  | 1.20 (1.10-1.30)         |                  | 1.09 (1.00-1.18)                  |                  | 1.32 (1.15-1.51)            |                  |
| P value                    | p<0.01                     |                  | p=0.27                      |                  | p<0.01                   |                  | p=0.04                            |                  | p<0.01                      |                  |
| aHR (95% CI)**             | 1.17 (1.10-1.24)           |                  | 1.07 (0.96-1.20)            |                  | 1.23 (1.13-1.34)         |                  | 1.12 (1.03-1.22)                  |                  | 1.32 (1.15-1.52)            |                  |
| P value                    | p<0.01                     |                  | p=0.23                      |                  | p<0.01                   |                  | p<0.01                            |                  | p<0.01                      |                  |
|                            | Vascular dementia          |                  | All cardiometabolic disease |                  | Type 2 diabetes mellitus |                  | Hypertension                      |                  | All autoimmune conditions   |                  |
|                            | Exposed                    | Unexposed        | Exposed                     | Unexposed        | Exposed                  | Unexposed        | Exposed                           | Unexposed        | Exposed                     | Unexposed        |
| Number of patients         | 31,879                     | 126,074          | 24,480                      | 99,676           | 29,842                   | 119,505          | 25,371                            | 102,283          | 29,135                      | 117,330          |
| Number of outcomes, n(%)   | 148 (0.46)                 | 474 (0.38)       | 2,310 (9.44)                | 8,363 (8.39)     | 1,355 (4.54)             | 3,913 (3.27)     | 1,881 (7.41)                      | 7,192 (7.03)     | 964 (3.31)                  | 2,700 (2.30)     |
| Person-years               | 196,449                    | 743,531          | 142,524                     | 554,252          | 179,645                  | 693,204          | 148,885                           | 572,392          | 152,881                     | 627,091          |
| IR (per 1000 person-years) | 0.75                       | 0.64             | 16.21                       | 15.09            | 7.54                     | 5.64             | 12.63                             | 12.56            | 6.31                        | 4.31             |
| Follow-up, Median(IQR)     | 5.47 (2.48-9.13)           | 5.10 (2.25-8.81) | 5.02 (2.21-8.68)            | 4.68 (2.02-8.32) | 5.27 (2.35-8.96)         | 4.98 (2.18-8.68) | 5.09 (2.25-8.72)                  | 4.73 (2.04-8.38) | 4.24 (1.75-7.95)            | 4.41 (1.85-8.05) |
| HR (95% CI)*               | 1.17 (0.98-1.41)           |                  | 1.07 (1.03-1.12)            |                  | 1.34 (1.26-1.42)         |                  | 1.01 (0.96-1.06)                  |                  | 1.47 (1.37-1.59)            |                  |

|                            | Type 1 diabetes mellitus |                  | Rheumatoid arthritis |                  | Systemic lupus erythematosus |                  | Sjogren          |                  | Vitiligo               |                  |
|----------------------------|--------------------------|------------------|----------------------|------------------|------------------------------|------------------|------------------|------------------|------------------------|------------------|
|                            | Exposed                  | Unexposed        | Exposed              | Unexposed        | Exposed                      | Unexposed        | Exposed          | Unexposed        | Exposed                | Unexposed        |
| P value                    | p=0.09                   |                  | p<0.01               |                  | p<0.01                       |                  | p=0.83           |                  | p<0.01                 |                  |
| aHR (95% CI)**             | 1.20 (1.00-1.45)         |                  | 1.07 (1.02-1.12)     |                  | 1.30 (1.22-1.38)             |                  | 1.01 (0.96-1.06) |                  | 1.48 (1.37-1.59)       |                  |
| P value                    | p=0.06                   |                  | p<0.01               |                  | p<0.01                       |                  | p=0.77           |                  | p<0.01                 |                  |
| Number of patients         | 31,664                   | 125,442          | 31,565               | 125,234          | 31,864                       | 126,089          | 31,910           | 126,159          | 31,838                 | 125,923          |
| Number of outcomes, n(%)   | 63 (0.20)                | 120 (0.10)       | 146 (0.46)           | 409 (0.33)       | 45 (0.14)                    | 72 (0.06)        | 44 (0.14)        | 63 (0.05)        | 63 (0.20)              | 138 (0.11)       |
| Person-years               | 194,829                  | 739,746          | 193,993              | 737,315          | 196,108                      | 743,639          | 196,422          | 744,022          | 195,815                | 742,249          |
| IR (per 1000 person-years) | 0.32                     | 0.16             | 0.75                 | 0.55             | 0.23                         | 0.1              | 0.22             | 0.08             | 0.32                   | 0.19             |
| Follow-up, Median(IQR)     | 5.46 (2.47-9.13)         | 5.10 (2.25-8.82) | 5.45 (2.47-9.11)     | 5.09 (2.25-8.80) | 5.46 (2.47-9.13)             | 5.10 (2.25-8.81) | 5.47 (2.47-9.13) | 5.10 (2.25-8.81) | 5.46 (2.47-9.12)       | 5.10 (2.25-8.81) |
| HR (95% CI)*               | 2.01 (1.48-2.72)         |                  | 1.35 (1.12-1.64)     |                  | 2.37 (1.64-3.45)             |                  | 2.64 (1.79-3.87) |                  | 1.74 (1.29-2.34)       |                  |
| P value                    | p<0.01                   |                  | p<0.01               |                  | p<0.01                       |                  | p<0.01           |                  | p<0.01                 |                  |
| aHR (95% CI)**             | 1.84 (1.35-2.51)         |                  | 1.37 (1.13-1.66)     |                  | 2.45 (1.68-3.57)             |                  | 2.57 (1.74-3.80) |                  | 1.59 (1.18-2.16)       |                  |
| P value                    | p<0.01                   |                  | p<0.01               |                  | p<0.01                       |                  | p<0.01           |                  | p<0.01                 |                  |
|                            | Psoriasis                |                  | Pernicious anaemia   |                  | Inflammatory bowel disease   |                  | Coeliac          |                  | Autoimmune thyroiditis |                  |
|                            | Exposed                  | Unexposed        | Exposed              | Unexposed        | Exposed                      | Unexposed        | Exposed          | Unexposed        | Exposed                | Unexposed        |
| Number of patients         | 30,606                   | 121,720          | 31,834               | 125,821          | 31,651                       | 125,247          | 31,849           | 125,942          | 31,864                 | 125,870          |
| Number of outcomes, n(%)   | 443 (1.45)               | 1,294 (1.06)     | 89 (0.28)            | 243 (0.19)       | 105 (0.33)                   | 321 (0.26)       | 56 (0.18)        | 173 (0.14)       | 50 (0.16)              | 144 (0.11)       |
| Person-years               | 186,612                  | 712,529          | 195,847              | 741,633          | 194,586                      | 737,712          | 195,911          | 742,372          | 196,034                | 741,787          |
| IR (per 1000 person-years) | 2.37                     | 1.82             | 0.45                 | 0.33             | 0.54                         | 0.44             | 0.29             | 0.23             | 0.26                   | 0.19             |
| Follow-up, Median(IQR)     | 5.40 (2.43-9.03)         | 5.04 (2.22-8.75) | 5.46 (2.48-9.12)     | 5.10 (2.25-8.81) | 5.45 (2.47-9.12)             | 5.10 (2.25-8.81) | 5.46 (2.47-9.12) | 5.10 (2.25-8.81) | 5.46 (2.47-9.12)       | 5.10 (2.25-8.81) |

1  
2  
3  
4  
5  
6  
7  
8  
9  
10  
11  
12  
13  
14  
15  
16  
17  
18  
19  
20  
21  
22  
23  
24  
25  
26  
27  
28  
29  
30  
31  
32  
33  
34  
35  
36  
37  
38  
39  
40  
41  
42  
43  
44  
45  
46

|                |                  |                  |                  |                  |                  |
|----------------|------------------|------------------|------------------|------------------|------------------|
| HR (95% CI)*   | 1.31 (1.17-1.46) | 1.39 (1.09-1.77) | 1.24 (1.00-1.55) | 1.23 (0.91-1.66) | 1.32 (0.95-1.82) |
| P value        | p<0.01           | p<0.01           | p=0.05           | p=0.18           | p=0.09           |
| aHR (95% CI)** | 1.31 (1.18-1.46) | 1.41 (1.10-1.80) | 1.23 (0.98-1.53) | 1.26 (0.93-1.70) | 1.29 (0.93-1.78) |
| P value        | p<0.01           | p<0.01           | p=0.07           | p=0.14           | p=0.12           |

|                            | Scleroderma      |                  | All mental health conditions |                  | Depression       |                  | Anxiety          |                  | Severe mental illness |                  |
|----------------------------|------------------|------------------|------------------------------|------------------|------------------|------------------|------------------|------------------|-----------------------|------------------|
|                            | Exposed          | Unexposed        | Exposed                      | Unexposed        | Exposed          | Unexposed        | Exposed          | Unexposed        | Exposed               | Unexposed        |
| Number of patients         | 31,945           | 126,219          | 21,932                       | 99,081           | 24,781           | 106,937          | 27,074           | 114,125          | 31,265                | 124,627          |
| Number of outcomes, n(%)   | 5 (0.02)         | 16 (0.01)        | 2,450 (11.17)                | 7,513 (7.58)     | 1,955 (7.89)     | 5,746 (5.37)     | 1,586 (5.86)     | 4,127 (3.62)     | 202 (0.65)            | 418 (0.34)       |
| Person-years               | 196,725          | 744,579          | 124,610                      | 551,747          | 144,563          | 605,666          | 158,613          | 653,590          | 192,266               | 734,597          |
| IR (per 1000 person-years) | 0.03             | 0.02             | 19.66                        | 13.62            | 13.52            | 9.49             | 10               | 6.31             | 1.05                  | 0.57             |
| Follow-up, Median(IQR)     | 5.47 (2.48-9.13) | 5.10 (2.25-8.82) | 4.83 (2.13-8.47)             | 4.69 (2.03-8.35) | 5.00 (2.22-8.70) | 4.80 (2.09-8.49) | 5.08 (2.27-8.73) | 4.90 (2.14-8.57) | 5.45 (2.47-9.12)      | 5.10 (2.25-8.81) |
| HR (95% CI)*               | 1.19 (0.43-3.24) |                  | 1.45 (1.38-1.51)             |                  | 1.43 (1.36-1.51) |                  | 1.58 (1.50-1.68) |                  | 1.85 (1.57-2.19)      |                  |
| P value                    | p=0.74           |                  | p<0.01                       |                  | p<0.01           |                  | p<0.01           |                  | p<0.01                |                  |
| aHR (95% CI)**             | 1.20 (0.43-3.32) |                  | 1.47 (1.40-1.53)             |                  | 1.45 (1.37-1.52) |                  | 1.58 (1.49-1.68) |                  | 1.86 (1.57-2.20)      |                  |
| P value                    | p=0.72           |                  | p<0.01                       |                  | p<0.01           |                  | p<0.01           |                  | p<0.01                |                  |

\* Unadjusted hazard ratio, IR: incidence rate, HR: hazard ratio, aHR: adjusted hazard ratio  
 \*\* Adjusted hazard ratio: adjusted for age, sex, body mass index, Townsend deprivation index, smoking status and ethnicity at baseline

**eTable 5. Baseline characteristics of the periodontitis cohort**

|                               | Periodontitis only cohort |                    |
|-------------------------------|---------------------------|--------------------|
|                               | Exposed<br>n (%)          | Unexposed<br>n (%) |
| All                           | (n=3,384)                 | (n=12,893)         |
| Sex (Male)                    | 1560 (46.10)              | 5927 (45.97)       |
| Age at index date             | 48.10 (17.43)             | 47.81 (17.25)      |
| Age categories                |                           |                    |
| 18 - 24 years                 | 330 (9.75)                | 1269 (9.84)        |
| 25 - 34 years                 | 502 (14.83)               | 1952 (15.14)       |
| 35 - 44 years                 | 650 (19.21)               | 2515 (19.51)       |
| 45 - 54 years                 | 701 (20.72)               | 2646 (20.52)       |
| 55 - 64 years                 | 560 (16.55)               | 2148 (16.66)       |
| 65 - 74 years                 | 369 (10.90)               | 1368 (10.61)       |
| 75 & overs                    | 272 (8.04)                | 995 (7.72)         |
| BMI                           | 26.49 (5.62)              | 26.43 (5.43)       |
| BMI Categories                |                           |                    |
| Under/Normal weight (18.5-25) | 1203 (35.55)              | 4539 (35.21)       |
| Overweight (25-30)            | 905 (26.74)               | 3475 (26.95)       |
| Obese (>30)                   | 571 (16.87)               | 2122 (16.46)       |
| Missing                       | 705 (20.83)               | 2757 (21.38)       |
| Townsend quintiles            |                           |                    |
| 1 (Least deprived)            | 584 (17.26)               | 2128 (16.51)       |
| 2                             | 580 (17.14)               | 2051 (15.91)       |
| 3                             | 614 (18.14)               | 2187 (16.96)       |
| 4                             | 644 (19.03)               | 2135 (16.56)       |
| 5 (Most deprived)             | 520 (15.37)               | 1616 (12.53)       |
| Missing                       | 442 (13.06)               | 2776 (21.53)       |
| Smoking categories            |                           |                    |
| Non-smoker                    | 1359 (40.16)              | 5221 (40.49)       |
| Smoker                        | 1124 (33.22)              | 4274 (33.15)       |
| Ex-smoker                     | 585 (17.29)               | 2224 (17.25)       |
| Missing                       | 316 (9.34)                | 1174 (9.11)        |
| Ethnicity                     |                           |                    |
| Caucasian                     | 1271 (37.56)              | 4906 (38.05)       |
| Mixed race                    | 21 (0.62)                 | 67 (0.52)          |
| Other                         | 5 (0.15)                  | 40 (0.31)          |
| Black                         | 45 (1.33)                 | 132 (1.02)         |
| South Asian                   | 82 (2.42)                 | 170 (1.32)         |
| Missing                       | 1960 (57.92)              | 7578 (58.78)       |

**eTable 6. Risk of chronic diseases at baseline in the periodontitis only sensitivity analysis cohort**

|                                                     | All cardiovascular disease |            | Heart failure               |               | Ischaemic heart disease      |            | Stroke/transient-ischaemic attack |               | Peripheral vascular disease |            |
|-----------------------------------------------------|----------------------------|------------|-----------------------------|---------------|------------------------------|------------|-----------------------------------|---------------|-----------------------------|------------|
|                                                     | Exposed                    | Unexposed  | Exposed                     | Unexposed     | Exposed                      | Unexposed  | Exposed                           | Unexposed     | Exposed                     | Unexposed  |
| Total number of patients                            | 3,384                      | 12,893     | 3,384                       | 12,893        | 3,384                        | 12,893     | 3,384                             | 12,893        | 3,384                       | 12,893     |
| Number of patients with condition at baseline, n(%) | 355 (10.49)                | 971 (7.53) | 53 (1.57)                   | 120 (0.93)    | 244 (7.21)                   | 607 (4.71) | 112 (3.31)                        | 297 (2.30)    | 59 (1.74)                   | 141 (1.09) |
| OR (95% CI)*                                        | 1.44 (1.27-1.64)           |            | 1.69 (1.22-2.35)            |               | 1.57 (1.35-1.83)             |            | 1.45 (1.16-1.81)                  |               | 1.60 (1.18-2.18)            |            |
| P value                                             | p<0.01                     |            | p<0.01                      |               | p<0.01                       |            | p<0.01                            |               | p<0.01                      |            |
| aOR (95% CI)**                                      | 1.50 (1.30-1.74)           |            | 1.71 (1.22-2.41)            |               | 1.64 (1.38-1.94)             |            | 1.43 (1.14-1.81)                  |               | 1.57 (1.15-2.15)            |            |
| P value                                             | p<0.01                     |            | p<0.01                      |               | p<0.01                       |            | p<0.01                            |               | p<0.01                      |            |
|                                                     | Vascular dementia          |            | All cardiometabolic disease |               | Type 2 diabetes mellitus     |            | Hypertension                      |               | All autoimmune conditions   |            |
|                                                     | Exposed                    | Unexposed  | Exposed                     | Unexposed     | Exposed                      | Unexposed  | Exposed                           | Unexposed     | Exposed                     | Unexposed  |
| Total number of patients, n                         | 3,384                      | 12,893     | 3,384                       | 12,893        | 3,384                        | 12,893     | 3,384                             | 12,893        | 3,384                       | 12,893     |
| Number of patients with condition at baseline, n(%) | 4 (0.12)                   | 18 (0.14)  | 659 (19.47)                 | 2,221 (17.23) | 172 (5.08)                   | 529 (4.10) | 590 (17.43)                       | 2,006 (15.56) | 286 (8.45)                  | 836 (6.48) |
| OR (95% CI)*                                        | 0.85 (0.29-2.50)           |            | 1.16 (1.06-1.28)            |               | 1.25 (1.05-1.49)             |            | 1.15 (1.04-1.27)                  |               | 1.33 (1.16-1.53)            |            |
| P value                                             | p=0.76                     |            | p<0.01                      |               | p=0.01                       |            | p<0.01                            |               | p<0.01                      |            |
| aOR (95% CI)**                                      | 0.71 (0.23-2.19)           |            | 1.19 (1.06-1.34)            |               | 1.25 (1.03-1.51)             |            | 1.17 (1.04-1.32)                  |               | 1.32 (1.15-1.52)            |            |
| P value                                             | p=0.55                     |            | p<0.01                      |               | p=0.02                       |            | p<0.01                            |               | p<0.01                      |            |
|                                                     | Type 1 diabetes mellitus   |            | Rheumatoid arthritis        |               | Systemic lupus erythematosus |            | Sjogren                           |               | Vitiligo                    |            |
|                                                     | Exposed                    | Unexposed  | Exposed                     | Unexposed     | Exposed                      | Unexposed  | Exposed                           | Unexposed     | Exposed                     | Unexposed  |
| Total number of patients, n                         | 3,384                      | 12,893     | 3,384                       | 12,893        | 3,384                        | 12,893     | 3,384                             | 12,893        | 3,384                       | 12,893     |

| Number of patients with condition at baseline, n(%) | 43 (1.27)         | 79 (0.61)  | 37 (1.09)                    | 96 (0.74)     | 10 (0.30)                  | 20 (0.16)     | 4 (0.12)         | 9 (0.07)     | 13 (0.38)              | 25 (0.19)  |
|-----------------------------------------------------|-------------------|------------|------------------------------|---------------|----------------------------|---------------|------------------|--------------|------------------------|------------|
| OR (95% CI)*                                        | 2.09 (1.44-3.03)  |            | 1.47 (1.01-2.16)             |               | 1.91 (0.89-4.08)           |               | 1.69 (0.52-5.50) |              | 1.98 (1.01-3.88)       |            |
| P value                                             | p<0.01            |            | p=0.05                       |               | p=0.10                     |               | p=0.38           |              | p=0.05                 |            |
| aOR (95% CI)**                                      | 2.07 (1.42-3.02)  |            | 1.44 (0.98-2.13)             |               | 1.82 (0.84-3.93)           |               | 1.45 (0.44-4.79) |              | 1.99 (1.01-3.92)       |            |
| P value                                             | p<0.01            |            | p=0.06                       |               | p=0.13                     |               | p=0.54           |              | p=0.05                 |            |
|                                                     | Psoriasis         |            | Pernicious anaemia           |               | Inflammatory bowel disease |               | Coeliac          |              | Autoimmune thyroiditis |            |
|                                                     | Exposed           | Unexposed  | Exposed                      | Unexposed     | Exposed                    | Unexposed     | Exposed          | Unexposed    | Exposed                | Unexposed  |
| Total number of patients, n                         | 3,384             | 12,893     | 3,384                        | 12,893        | 3,384                      | 12,893        | 3,384            | 12,893       | 3,384                  | 12,893     |
| Number of patients with condition at baseline, n(%) | 125 (3.69)        | 437 (3.39) | 14 (0.41)                    | 31 (0.24)     | 36 (1.06)                  | 94 (0.73)     | 8 (0.24)         | 32 (0.25)    | 9 (0.27)               | 42 (0.33)  |
| OR (95% CI)*                                        | 1.09 (0.89-1.34)  |            | 1.72 (0.92-3.24)             |               | 1.46 (1.00-2.15)           |               | 0.95 (0.44-2.07) |              | 0.82 (0.40-1.68)       |            |
| P value                                             | p=0.39            |            | p=0.09                       |               | p=0.05                     |               | p=0.90           |              | p=0.58                 |            |
| aOR (95% CI)**                                      | 1.09 (0.89-1.34)  |            | 1.54 (0.81-2.92)             |               | 1.45 (0.98-2.14)           |               | 0.98 (0.45-2.15) |              | 0.81 (0.39-1.67)       |            |
| P value                                             | p=0.40            |            | p=0.19                       |               | p=0.06                     |               | p=0.97           |              | p=0.57                 |            |
|                                                     | Scleroderma       |            | All mental health conditions |               | Depression                 |               | Anxiety          |              | Severe mental illness  |            |
|                                                     | Exposed           | Unexposed  | Exposed                      | Unexposed     | Exposed                    | Unexposed     | Exposed          | Unexposed    | Exposed                | Unexposed  |
| Total number of patients, n                         | 3,384             | 12,893     | 3,384                        | 12,893        | 3,384                      | 12,893        | 3,384            | 12,893       | 3,384                  | 12,893     |
| Number of patients with condition at baseline, n(%) | 7 (0.21)          | 7 (0.05)   | 1,021 (30.17)                | 2,745 (21.29) | 704 (20.80)                | 1,942 (15.06) | 531 (15.69)      | 1,252 (9.71) | 70 (2.07)              | 149 (1.16) |
| OR (95% CI)*                                        | 3.82 (1.34-10.89) |            | 1.60 (1.47-1.74)             |               | 1.48 (1.35-1.63)           |               | 1.73 (1.55-1.93) |              | 1.81 (1.36-2.41)       |            |
| P value                                             | p=0.01            |            | p<0.01                       |               | p<0.01                     |               | p<0.01           |              | p<0.01                 |            |



1  
2  
3  
4  
5  
6  
7  
8  
9  
10  
11  
12  
13  
14  
15  
16  
17  
18  
19  
20  
21  
22  
23  
24  
25  
26  
27  
28  
29  
30  
31  
32  
33  
34  
35  
36  
37  
38  
39  
40  
41  
42  
43  
44  
45  
46

|                |                   |                  |                  |                  |                  |
|----------------|-------------------|------------------|------------------|------------------|------------------|
| aOR (95% CI)** | 4.18 (1.45-12.10) | 1.63 (1.49-1.78) | 1.50 (1.36-1.66) | 1.74 (1.55-1.94) | 1.83 (1.37-2.44) |
| P value        | p<0.01            | p<0.01           | p<0.01           | p<0.01           | p<0.01           |

\* Unadjusted odds ratio, OR: odds ratio, aOR: adjusted odds ratio  
 \*\* Adjusted odds ratio: adjusted for age, sex, body mass index, Townsend deprivation index, smoking status and ethnicity at baseline

For peer review only

**eTable 7. Risk of subsequent development of chronic diseases in the periodontitis only sensitivity analysis**

|                            | All cardiovascular disease |                   | Heart failure               |                   | Ischaemic heart disease  |                   | Stroke/transient-ischaemic attack |                   | Peripheral vascular disease |                   |
|----------------------------|----------------------------|-------------------|-----------------------------|-------------------|--------------------------|-------------------|-----------------------------------|-------------------|-----------------------------|-------------------|
|                            | Exposed                    | Unexposed         | Exposed                     | Unexposed         | Exposed                  | Unexposed         | Exposed                           | Unexposed         | Exposed                     | Unexposed         |
| Number of patients         | 3,029                      | 11,922            | 3,331                       | 12,773            | 3,140                    | 12,286            | 3,272                             | 12,596            | 3,325                       | 12,752            |
| Number of outcomes, n(%)   | 221 (7.30)                 | 646 (5.42)        | 57 (1.71)                   | 156 (1.22)        | 106 (3.38)               | 301 (2.45)        | 97 (2.96)                         | 311 (2.47)        | 47 (1.41)                   | 101 (0.79)        |
| Person-years               | 21,705                     | 80,954            | 24,737                      | 88,720            | 22,881                   | 84,397            | 24,127                            | 86,844            | 24,625                      | 88,567            |
| IR (per 1000 person-years) | 10.18                      | 7.98              | 2.3                         | 1.76              | 4.63                     | 3.57              | 4.02                              | 3.58              | 1.91                        | 1.14              |
| Follow-up, Median(IQR)     | 5.92 (2.63-10.83)          | 5.60 (2.30-10.26) | 6.31 (2.81-11.32)           | 5.83 (2.42-10.46) | 6.19 (2.75-11.03)        | 5.70 (2.36-10.36) | 6.23 (2.81-11.15)                 | 5.73 (2.39-10.37) | 6.29 (2.77-11.23)           | 5.83 (2.42-10.48) |
| HR (95% CI)*               | 1.27 (1.09-1.48)           |                   | 1.30 (0.96-1.77)            |                   | 1.30 (1.04-1.62)         |                   | 1.12 (0.89-1.41)                  |                   | 1.67 (1.18-2.36)            |                   |
| P value                    | p<0.01                     |                   | p=0.09                      |                   | p=0.02                   |                   | p=0.33                            |                   | p<0.01                      |                   |
| aHR (95% CI)**             | 1.31 (1.12-1.52)           |                   | 1.27 (0.94-1.73)            |                   | 1.35 (1.08-1.69)         |                   | 1.12 (0.89-1.41)                  |                   | 1.67 (1.18-2.38)            |                   |
| P value                    | p<0.01                     |                   | p=0.12                      |                   | p<0.01                   |                   | p=0.34                            |                   | p<0.01                      |                   |
|                            | Vascular dementia          |                   | All cardiometabolic disease |                   | Type 2 diabetes mellitus |                   | Hypertension                      |                   | All autoimmune conditions   |                   |
|                            | Exposed                    | Unexposed         | Exposed                     | Unexposed         | Exposed                  | Unexposed         | Exposed                           | Unexposed         | Exposed                     | Unexposed         |
| Number of patients         | 3,380                      | 12,875            | 2,725                       | 10,672            | 3,212                    | 12,364            | 2,794                             | 10,887            | 3,098                       | 12,057            |
| Number of outcomes, n(%)   | 20 (0.59)                  | 55 (0.43)         | 303 (11.12)                 | 1,133 (10.62)     | 173 (5.39)               | 449 (3.63)        | 247 (8.84)                        | 982 (9.02)        | 104 (3.36)                  | 308 (2.55)        |
| Person-years               | 25,137                     | 89,654            | 18,750                      | 68,456            | 23,111                   | 84,508            | 19,504                            | 70,497            | 19,592                      | 74,615            |
| IR (per 1000 person-years) | 0.8                        | 0.61              | 16.16                       | 16.55             | 7.49                     | 5.31              | 12.66                             | 13.93             | 5.31                        | 4.13              |
| Follow-up, Median(IQR)     | 6.31 (2.84-11.32)          | 5.86 (2.44-10.51) | 5.54 (2.38-10.38)           | 5.16 (2.12-9.61)  | 6.00 (2.65-10.90)        | 5.66 (2.34-10.32) | 5.67 (2.45-10.54)                 | 5.23 (2.14-9.72)  | 4.86 (1.93-9.57)            | 4.89 (1.89-9.45)  |
| HR (95% CI)*               | 1.27 (0.76-2.12)           |                   | 0.97 (0.86-1.10)            |                   | 1.40 (1.18-1.67)         |                   | 0.90 (0.79-1.04)                  |                   | 1.25 (1.00-1.56)            |                   |

1  
2  
3  
4  
5  
6  
7  
8  
9  
10  
11  
12  
13  
14  
15  
16  
17  
18  
19  
20  
21  
22  
23  
24  
25  
26  
27  
28  
29  
30  
31  
32  
33  
34  
35  
36  
37  
38  
39  
40  
41  
42  
43  
44  
45  
46

|                            | Type 1 diabetes mellitus |                   | Rheumatoid arthritis |                   | Systemic lupus erythematosus |                   | Sjogren           |                   | Vitiligo               |                   |
|----------------------------|--------------------------|-------------------|----------------------|-------------------|------------------------------|-------------------|-------------------|-------------------|------------------------|-------------------|
|                            | Exposed                  | Unexposed         | Exposed              | Unexposed         | Exposed                      | Unexposed         | Exposed           | Unexposed         | Exposed                | Unexposed         |
| P value                    | p=0.36                   |                   | p=0.65               |                   | p<0.01                       |                   | p=0.16            |                   | p=0.05                 |                   |
| aHR (95% CI)**             | 1.23 (0.73-2.07)         |                   | 0.96 (0.85-1.10)     |                   | 1.43 (1.20-1.71)             |                   | 0.91 (0.79-1.05)  |                   | 1.21 (0.96-1.51)       |                   |
| P value                    | p=0.44                   |                   | p=0.57               |                   | p<0.01                       |                   | p=0.20            |                   | p=0.10                 |                   |
| Number of patients         | 3,341                    | 12,814            | 3,347                | 12,797            | 3,374                        | 12,873            | 3,380             | 12,884            | 3,371                  | 12,868            |
| Number of outcomes, n(%)   | 8 (0.24)                 | 17 (0.13)         | 13 (0.39)            | 51 (0.40)         | 6 (0.18)                     | 10 (0.08)         | 6 (0.18)          | 3 (0.02)          | 8 (0.24)               | 9 (0.07)          |
| Person-years               | 24,868                   | 89,212            | 24,897               | 88,889            | 25,097                       | 89,628            | 25,152            | 89,766            | 25,066                 | 89,569            |
| IR (per 1000 person-years) | 0.32                     | 0.19              | 0.52                 | 0.57              | 0.24                         | 0.11              | 0.24              | 0.03              | 0.32                   | 0.1               |
| Follow-up, Median(IQR)     | 6.31 (2.81-11.32)        | 5.86 (2.44-10.51) | 6.31 (2.81-11.32)    | 5.83 (2.42-10.48) | 6.31 (2.84-11.32)            | 5.86 (2.44-10.51) | 6.31 (2.84-11.32) | 5.86 (2.44-10.51) | 6.31 (2.84-11.32)      | 5.85 (2.44-10.51) |
| HR (95% CI)*               | 1.71 (0.74-3.97)         |                   | 0.90 (0.49-1.66)     |                   | 2.13 (0.77-5.86)             |                   | 7.02 (1.76-28.09) |                   | 3.13 (1.21-8.13)       |                   |
| P value                    | p=0.21                   |                   | p=0.74               |                   | p=0.14                       |                   | p<0.01            |                   | p=0.02                 |                   |
| aHR (95% CI)**             | 1.62 (0.70-3.76)         |                   | 0.96 (0.52-1.77)     |                   | 2.15 (0.77-6.00)             |                   | 6.67 (1.66-26.86) |                   | 2.90 (1.11-7.61)       |                   |
| P value                    | p=0.26                   |                   | p=0.90               |                   | p=0.14                       |                   | p<0.01            |                   | p=0.03                 |                   |
|                            | Psoriasis                |                   | Pernicious anaemia   |                   | Inflammatory bowel disease   |                   | Coeliac           |                   | Autoimmune thyroiditis |                   |
|                            | Exposed                  | Unexposed         | Exposed              | Unexposed         | Exposed                      | Unexposed         | Exposed           | Unexposed         | Exposed                | Unexposed         |
| Number of patients         | 3,259                    | 12,456            | 3,370                | 12,862            | 3,348                        | 12,799            | 3,376             | 12,861            | 3,375                  | 12,851            |
| Number of outcomes, n(%)   | 49 (1.50)                | 165 (1.32)        | 13 (0.39)            | 25 (0.19)         | 13 (0.39)                    | 34 (0.27)         | 5 (0.15)          | 20 (0.16)         | 1 (0.03)               | 12 (0.09)         |
| Person-years               | 23,982                   | 85,868            | 25,033               | 89,510            | 24,901                       | 89,000            | 25,106            | 89,487            | 25,127                 | 89,498            |
| IR (per 1000 person-years) | 2.04                     | 1.92              | 0.52                 | 0.28              | 0.52                         | 0.38              | 0.2               | 0.22              | 0.04                   | 0.13              |
| Follow-up, Median(IQR)     | 6.25 (2.77-11.10)        | 5.76 (2.39-10.37) | 6.31 (2.84-11.25)    | 5.84 (2.44-10.50) | 6.31 (2.81-11.32)            | 5.85 (2.43-10.50) | 6.31 (2.82-11.32) | 5.85 (2.44-10.50) | 6.31 (2.84-11.32)      | 5.86 (2.44-10.51) |
| HR (95% CI)*               | 1.06 (0.77-1.46)         |                   | 1.85 (0.95-3.62)     |                   | 1.35 (0.71-2.57)             |                   | 0.90 (0.34-2.39)  |                   | 0.30 (0.04-2.29)       |                   |

|                            | Scleroderma       |                   | All mental health conditions |                  | Depression        |                   | Anxiety           |                   | Severe mental illness |                   |
|----------------------------|-------------------|-------------------|------------------------------|------------------|-------------------|-------------------|-------------------|-------------------|-----------------------|-------------------|
|                            | Exposed           | Unexposed         | Exposed                      | Unexposed        | Exposed           | Unexposed         | Exposed           | Unexposed         | Exposed               | Unexposed         |
| P value                    | p=0.71            |                   | p=0.07                       |                  | p=0.35            |                   | p=0.83            |                   | p=0.24                |                   |
| aHR (95% CI)**             | 1.05 (0.76-1.44)  |                   | 1.89 (0.96-3.74)             |                  | 1.35 (0.71-2.57)  |                   | 0.85 (0.32-2.28)  |                   | 0.29 (0.04-2.23)      |                   |
| P value                    | p=0.78            |                   | p=0.07                       |                  | p=0.36            |                   | p=0.75            |                   | p=0.23                |                   |
| Number of patients         | 3,377             | 12,886            | 2,363                        | 10,148           | 2,680             | 10,951            | 2,853             | 11,641            | 3,314                 | 12,744            |
| Number of outcomes, n(%)   | 2 (0.06)          | 3 (0.02)          | 287 (12.15)                  | 875 (8.62)       | 224 (8.36)        | 671 (6.13)        | 189 (6.62)        | 521 (4.48)        | 15 (0.45)             | 46 (0.36)         |
| Person-years               | 25,152            | 89,739            | 16,121                       | 65,906           | 18,839            | 72,978            | 19,995            | 77,498            | 24,744                | 88,828            |
| IR (per 1000 person-years) | 0.08              | 0.03              | 17.8                         | 13.28            | 11.89             | 9.19              | 9.45              | 6.72              | 0.61                  | 0.52              |
| Follow-up, Median(IQR)     | 6.31 (2.84-11.32) | 5.86 (2.44-10.51) | 5.59 (2.33-10.37)            | 5.24 (2.09-9.85) | 5.76 (2.54-10.52) | 5.47 (2.21-10.09) | 5.77 (2.54-10.63) | 5.50 (2.24-10.04) | 6.34 (2.86-11.32)     | 5.86 (2.44-10.51) |
| HR (95% CI)*               | 2.40 (0.40-14.36) |                   | 1.35 (1.18-1.54)             |                  | 1.30 (1.12-1.52)  |                   | 1.41 (1.19-1.66)  |                   | 1.18 (0.66-2.12)      |                   |
| P value                    | p=0.34            |                   | p<0.01                       |                  | p<0.01            |                   | p<0.01            |                   | p=0.57                |                   |
| aHR (95% CI)**             | 2.26 (0.37-13.70) |                   | 1.33 (1.16-1.52)             |                  | 1.29 (1.11-1.50)  |                   | 1.37 (1.16-1.62)  |                   | 1.24 (0.69-2.23)      |                   |
| P value                    | p=0.37            |                   | p<0.01                       |                  | p<0.01            |                   | p<0.01            |                   | p=0.47                |                   |

\* Unadjusted hazard ratio, IR: incidence rate, HR: hazard ratio, aHR: adjusted hazard ratio

\*\* Adjusted hazard ratio: adjusted for age, sex, body mass index, Townsend deprivation index, smoking status and ethnicity at baseline

**STROBE Statement—Checklist of items that should be included in reports of *cohort studies***

|                           | <b>Item No</b> | <b>Recommendation</b>                                                                                                           | <b>Reporting Location</b> |
|---------------------------|----------------|---------------------------------------------------------------------------------------------------------------------------------|---------------------------|
| <b>Title and abstract</b> | 1              | (a) Indicate the study’s design with a commonly used term in the title or the abstract                                          | Title and abstract        |
|                           |                | (b) Provide in the abstract an informative and balanced summary of what was done and what was found                             | Abstract                  |
| <b>Introduction</b>       |                |                                                                                                                                 |                           |
| Background/rationale      | 2              | Explain the scientific background and rationale for the investigation being reported                                            | Introduction              |
| Objectives                | 3              | State specific objectives, including any prespecified hypotheses                                                                | Introduction              |
| <b>Methods</b>            |                |                                                                                                                                 |                           |
| Study design              | 4              | Present key elements of study design early in the paper                                                                         | Methods                   |
| Setting                   | 5              | Describe the setting, locations, and relevant dates, including periods of recruitment, exposure, follow-up, and data collection | Methods                   |

1  
2  
3  
4  
5  
6  
7  
8  
9  
10  
11  
12  
13  
14  
15  
16  
17  
18  
19  
20  
21  
22  
23  
24  
25  
26  
27  
28  
29  
30  
31  
32  
33  
34  
35  
36  
37  
38  
39  
40  
41  
42  
43  
44  
45  
46

|                                                                                                    |                              |    |                                                                                                                                                                                      |                             |
|----------------------------------------------------------------------------------------------------|------------------------------|----|--------------------------------------------------------------------------------------------------------------------------------------------------------------------------------------|-----------------------------|
| 1<br>2<br>3<br>4<br>5<br>6<br>7<br>8<br>9<br>10<br>11<br>12<br>13<br>14<br>15                      | Participants                 | 6  | (a) Give the eligibility criteria, and the sources and methods of selection of participants.<br>Describe methods of follow-up                                                        | Methods                     |
| 16<br>17<br>18<br>19<br>20<br>21<br>22<br>23<br>24<br>25<br>26<br>27<br>28<br>29                   |                              |    | (b) For matched studies, give matching criteria and number of exposed and unexposed                                                                                                  | Methods<br>Results: Table 1 |
| 30<br>31<br>32<br>33<br>34<br>35<br>36<br>37<br>38<br>39<br>40<br>41<br>42<br>43<br>44<br>45<br>46 | Variables                    | 7  | Clearly define all outcomes, exposures, predictors, potential confounders, and effect modifiers. Give diagnostic criteria, if applicable                                             | Methods                     |
|                                                                                                    | Data sources/<br>measurement | 8* | For each variable of interest, give sources of data and details of methods of assessment (measurement). Describe comparability of assessment methods if there is more than one group | Methods                     |
|                                                                                                    | Bias                         | 9  | Describe any efforts to address potential sources of bias                                                                                                                            | Methods/discussion          |
|                                                                                                    | Study size                   | 10 | Explain how the study size was arrived at                                                                                                                                            | Methods                     |

1  
2  
3  
4  
5  
6  
7  
8  
9  
10  
11  
12  
13  
14  
15  
16  
17  
18  
19  
20  
21  
22  
23  
24  
25  
26  
27  
28  
29  
30  
31  
32  
33  
34  
35  
36  
37  
38  
39  
40  
41  
42  
43  
44  
45  
46

|                        |    |                                                                                                                              |         |
|------------------------|----|------------------------------------------------------------------------------------------------------------------------------|---------|
| Quantitative variables | 11 | Explain how quantitative variables were handled in the analyses. If applicable, describe which groupings were chosen and why | Methods |
|------------------------|----|------------------------------------------------------------------------------------------------------------------------------|---------|

|                     |    |                                                                                       |         |
|---------------------|----|---------------------------------------------------------------------------------------|---------|
| Statistical methods | 12 | (a) Describe all statistical methods, including those used to control for confounding | Methods |
|---------------------|----|---------------------------------------------------------------------------------------|---------|

|  |  |                                                                     |         |
|--|--|---------------------------------------------------------------------|---------|
|  |  | (b) Describe any methods used to examine subgroups and interactions | Methods |
|--|--|---------------------------------------------------------------------|---------|

|  |  |                                             |         |
|--|--|---------------------------------------------|---------|
|  |  | (c) Explain how missing data were addressed | Methods |
|--|--|---------------------------------------------|---------|

|  |  |                                                                |         |
|--|--|----------------------------------------------------------------|---------|
|  |  | (d) If applicable, explain how loss to follow-up was addressed | Methods |
|--|--|----------------------------------------------------------------|---------|

|  |  |                                       |         |
|--|--|---------------------------------------|---------|
|  |  | (e) Describe any sensitivity analyses | Methods |
|--|--|---------------------------------------|---------|

**Results**

|              |     |                                                                                                                                                                                                   |                     |
|--------------|-----|---------------------------------------------------------------------------------------------------------------------------------------------------------------------------------------------------|---------------------|
| Participants | 13* | (a) Report numbers of individuals at each stage of study—eg numbers potentially eligible, examined for eligibility, confirmed eligible, included in the study, completing follow-up, and analysed | Methods and results |
|--------------|-----|---------------------------------------------------------------------------------------------------------------------------------------------------------------------------------------------------|---------------------|

|                  |     |                                                                                                                                                                                                              |                       |
|------------------|-----|--------------------------------------------------------------------------------------------------------------------------------------------------------------------------------------------------------------|-----------------------|
|                  |     | (b) Give reasons for non-participation at each stage                                                                                                                                                         | N/A                   |
|                  |     | (c) Consider use of a flow diagram                                                                                                                                                                           | N/A                   |
| Descriptive data | 14* | (a) Give characteristics of study participants (eg demographic, clinical, social) and information on exposures and potential confounders                                                                     | Results               |
|                  |     | (b) Indicate number of participants with missing data for each variable of interest                                                                                                                          | Table 1               |
|                  |     | (c) Summarise follow-up time (eg, average and total amount)                                                                                                                                                  | Table 1               |
| Outcome data     | 15* | Report numbers of outcome events or summary measures over time                                                                                                                                               | Results and Table 2/3 |
| Main results     | 16  | (a) Give unadjusted estimates and, if applicable, confounder-adjusted estimates and their precision (eg, 95% confidence interval). Make clear which confounders were adjusted for and why they were included | Results and Table 2/3 |
|                  |     | (b) Report category boundaries when continuous variables were categorized                                                                                                                                    | Results and Table 2/3 |



1  
2  
3  
4  
5  
6  
7  
8  
9  
10  
11  
12  
13  
14  
15  
16  
17  
18  
19  
20  
21  
22  
23  
24  
25  
26  
27  
28  
29  
30  
31  
32  
33  
34  
35  
36  
37  
38  
39  
40  
41  
42  
43  
44  
45  
46

|                          |    |                                                                                                                                                                            |                                             |
|--------------------------|----|----------------------------------------------------------------------------------------------------------------------------------------------------------------------------|---------------------------------------------|
|                          |    | (c) If relevant, consider translating estimates of relative risk into absolute risk for a meaningful time period                                                           | N/A                                         |
| Other analyses           | 17 | Report other analyses done—eg analyses of subgroups and interactions, and sensitivity analyses                                                                             | Mentioned in results and throughout etables |
| <b>Discussion</b>        |    |                                                                                                                                                                            |                                             |
| Key results              | 18 | Summarise key results with reference to study objectives                                                                                                                   | Discussion                                  |
| Limitations              | 19 | Discuss limitations of the study, taking into account sources of potential bias or imprecision. Discuss both direction and magnitude of any potential bias                 | Discussion                                  |
| Interpretation           | 20 | Give a cautious overall interpretation of results considering objectives, limitations, multiplicity of analyses, results from similar studies, and other relevant evidence | Discussion                                  |
| Generalisability         | 21 | Discuss the generalisability (external validity) of the study results                                                                                                      | Discussion                                  |
| <b>Other information</b> |    |                                                                                                                                                                            |                                             |

---

|         |    |                                                                                                                                                               |                                                     |
|---------|----|---------------------------------------------------------------------------------------------------------------------------------------------------------------|-----------------------------------------------------|
| Funding | 22 | Give the source of funding and the role of the funders for the present study and, if applicable, for the original study on which the present article is based | Highlighted in funding and acknowledgements section |
|---------|----|---------------------------------------------------------------------------------------------------------------------------------------------------------------|-----------------------------------------------------|

---

For peer review only
